# Supplementary material for: Different prevalence and spectrum of malignancy between Chinese patients and American patients with rheumatoid arthritis: a comparative study
Source: PeerJ. 2024 Dec 18;12:e18650. doi: 10.7717/peerj.18650 (PMC11662904; doi:10.7717/peerj.18650)
Supplement: Supplemental Information 1 — The raw data shows that the prevalence of malignancy in Chinese patients with RA is nearly twice lower than that in the US (6.2% vs. 12.6%). [file peerj-12-18650-s001.xlsx]

## Sheet: Sheet2
cancer	number	sex	age	age of RA onset	age of malignancy diagnosis	pain	date of malignancy diagnosis	height	weight	BMI	smoking	RA disease duration, months	ESRmmh	CRPmgl	RF	CCP	TJC28	SJC28	PtGA	PrGA	PainVAS	CDAI	CDAI	HAQ-DI	Physical dysfunction	HBP	T2DM	CVD	Dyslipidaemia
no	1	Female	52	52		2017-10-15		156	63	25.8876	no	1	101	101	negative	negative	24	20	4	4	2	52	3	0.625	1	0	0	0	0
no	2	Female	37	37		2021-03-25		163	68.5	25.7819	no	1	104	66.8	Positive	Positive	9	9	5	5	4	28	3	0.5	1	0	0	0	0
no	3	Female	54	53.9167		2020-04-01		150	50	22.2222	no	1	84	6.66	Positive	Positive	3	2	1	1	1	7	1	0	0	1	0	0	1
no	4	Female	32	32		2020-07-26		163.5	49.2	18.4047	no	1	11	3.11	Positive	Positive	0	0	2	2	1	4	1	0	0	1	0	0	1
no	5	Female	29	28.9167		2019-09-01		163.005	53.5	20.135	no	1	20	10.3	Positive	Positive	3	1	3	3	5	10	2	0.125	1	0	0	0	1
no	6	Female	49	49		2017-09-01		162	46.4	17.6802	no	1	24	6.4	Positive	Positive	9	4	3	3	8	19	2	0.125	1	0	0	0	0
no	7	Female	36	36		2018-02-01		169	78.8	27.5901	no	1	30	3.14	Positive	Positive	4	3	6	4	4	17	2	0.125	1	0	0	0	0
no	8	Female	64	63		2020-06-01		163	67	25.2174	no	1	85	16.8	Positive	Positive	8	4	6	6	4	24	3	2.75	1	0	0	0	1
no	9	Female	54	54		2021-10-17		158	58.1	23.2735	no	1	46	8.69	Positive	Positive	9	6	4	4	4	23	3	0.375	1	0	0	0	0
no	10	Female	41	40		2021-01-24		160	46	17.9688	no	1	60	10.2	Positive	Positive	5	5	1	1	1	12	2	0.125	1	0	1	1	1
no	11	Female	46	45.8333		2019-12-01		154	60.6	25.5524	no	2	28	3.14	Positive	negative	2	3	9	9	9	23	3	1.875	1	0	1	0	1
no	12	Female	38	38		2021-02-01		162	48.3	18.4042	no	2	26	3.3	negative	negative	0	2	9	9	10	20	2	1.875	1	0	1	0	1
no	13	Female	55	54.8333		2020-05-01		157.5	53.5	21.5671	no	2	51	19.2	Positive	Positive	15	8	5	6	5	34	3	1.5	1	0	0	0	0
no	14	Female	34	34		2019-05-01		172	72.9	24.6417	no	3	32	20.4	Positive	Positive	0	0	3	3	4	6	1	0	0	0	0	0	0
no	15	Female	43	42.75		2020-03-01		163	59.6	22.4322	no	3	53	46	negative	Positive	28	28	10	10	6	76	3	0.5	1	0	0	0	0
no	16	Female	43	43		2019-03-01		157	58.2	23.6115	no	3	14	3.11	Positive	Positive	1	0	4	4	5	9	1	0.25	1	1	0	0	0
no	17	Female	68	68		2015-07-01		148	42.9	19.5855	no	3	136	65.9	Positive	Positive	12	7	7	6	7	32	3	1.12	1	0	0	0	0
no	18	Female	34	34		2015-07-01		158	46.6	18.6669	no	3	67	39.2	negative	negative	10	10	7	7	4	34	3	1.12	1	0	0	0	0
no	19	Female	53	53		2021-03-22		160	59.4	23.2031	no	3	55	63.6	Positive	negative	3	3	7	7	5	20	2	2.25	1	0	0	0	0
no	20	Female	20	20		2016-02-01		157	61	24.7475	no	3	15	66.7	negative	negative	14	12	8	8	8	42	3	2.25	1	0	0	0	0
no	21	Female	50	49		2018-08-01		162	60.1	22.9005	no	3	31	7.95	Positive	Positive	16	2	8	8	2	34	3	0.75	1	1	0	0	0
no	22	Female	64	63		2021-05-01		160	57.3	22.3828	no	3	121	118	Positive	Positive	13	8	6	8	8	35	3	2.125	1	1	0	0	1
no	23	Female	36	35		2021-04-01		165	47.7	17.5207	no	4	70	16	Positive	Positive	1	1	2	2	1	6	1	0	0	0	0	0	0
no	24	Female	28	28		2017-01-01		152	45.4	19.6503	no	4	5	3.02	negative	negative	0	0	0	0	2	0	0	0	0	0	0	0	1
no	25	Female	48	48		2015-08-01		167	65.4	23.4501	yes	4	10	8.35	Positive	negative	1	1	6	6	5	14	2	0.5	1	0	0	0	0
no	26	Female	42	42		2017-01-01		150	54.5	24.2222	no	4	21	3.11	negative	negative	1	0	2	2	2	5	1	0	0	0	0	0	1
no	27	Female	78	78		2017-03-01		145	40.5	19.2628	no	4	53	81	Positive	Positive	0	0	7	7	2	14	2	2.625	1	0	0	0	0
no	28	Female	51	51		2019-02-01		155	53.2	22.1436	no	4	15	3.13	Positive	Positive	9	3	1	1	2	14	2	0.125	1	0	1	0	1
no	29	Female	62	62		2015-09-01		160	41.4	16.1719	no	4	8	4.89	negative	negative	1	0	3	3	2	7	1	0	0	0	0	0	0
no	30	Female	47	46		2020-11-01		156	47.4	19.4773	no	4	26	3.3	Positive	Positive	8	3	2	2	3	15	2	0.125	1	1	0	1	0
no	31	Female	52	51		2021-07-10		152	51	22.0741	no	4	15	3.13	Positive	Positive	2	1	2	2	1	7	1	0	0	1	0	0	0
no	32	Female	48	48		2017-07-01		164	77.7	28.8891	no	4	69	10.2	Positive	Positive	1	1	0	0	6	2	0	0	0	1	0	0	1
no	33	Female	18	17		2015-07-01		164	49.5	18.4042	no	5	28	31.2	Positive	Positive	1	1	0	0	0	2	0	0	0	0	0	0	0
no	34	Female	41	41		2015-04-01		155	55.7	23.1842	no	5	32	3.28	Positive	Positive	4	4	2	2	2	12	2	0	0	0	0	0	0
no	35	Female	44	44		2017-02-01		160	53.4	20.8594	no	5	81	43.9	Positive	Positive	9	8	10	10	9	37	3	2.5	1	0	0	0	0
no	36	Female	35	34.5		2020-04-01		164	53.2	19.7799	no	5	2	2.98	negative	Positive	5	3	3	2	2	13	2	0.5	1	0	0	0	0
no	37	Female	51	50.25		2020-07-01		155	56.1	23.3507	no	5	111	3.3	negative	Positive	1	4	4	4	2	13	2	0.25	1	1	1	1	1
no	38	Female	48	48		2018-10-01		151	67.5	29.604	no	5	72	9.09	Positive	negative	19	5	5	5	5	34	3	1.125	1	0	0	0	0
no	39	Female	24	24		2021-06-17		160	55.5	21.6797	no	5	11	5.89	Positive	Positive	3	0	6	4	5	13	2	0.75	1	1	0	0	1
no	40	Female	33	33		2018-12-01		157	44.7	18.1346	no	6	75	3.52	Positive	negative	4	4	2	2	1	12	2	0	0	0	0	0	0
no	41	Female	36	36		2018-01-01		170	55.7	19.2734	no	6	19	3.23	Positive	Positive	8	7	2	2	2	19	2	0.125	1	0	0	0	0
no	42	Female	52	51.5		2020-01-01		155	46.1	19.1883	no	6	147	123	Positive	Positive	15	12	6	6	6	39	3	2.375	1	0	0	0	0
no	43	Female	50	50		2015-11-01		158	66.3	26.5582	no	6	26	6.84	negative	Positive	13	13	2	2	4	30	3	0.625	1	1	0	1	1
no	44	Female	58	57.4167		2019-11-01		140	42.3	21.5816	no	6	143	53.6	Positive	Positive	15	14	6	6	6	41	3	2.5	1	1	0	0	1
no	45	Female	37	37		2015-07-15		150	50.4	22.4	no	6	44	3.3	Positive	Positive	0	0	4	4	2	8	1	0.5	1	0	0	0	1
no	46	Female	65	65		2018-11-15		148	44.5	20.3159	no	6	95	55.1	Positive	Positive	4	3	6	6	7	19	2	2.5	1	1	0	0	1
no	47	Female	74	74		2015-06-01		160	59.7	23.3203	no	6	136	10.5	Positive	Positive	17	5	8	8	6	38	3	2.5	1	0	0	0	0
no	48	Female	51	50		2021-01-01		158	51.9	20.7899	no	6	38	3.3	negative	Positive	12	9	3	3	4	27	3	0.5	1	0	0	0	0
no	49	Female	52	52		2015-08-01		158	54.5	21.8314	no	6	12	18.4	Positive	Positive	2	2	4	4	4	12	2	0.875	1	1	0	1	0
no	50	Female	58	58		2020-03-14		150	66.4	29.5111	no	6	80	48.2	negative	Positive	6	0	7	7	6	20	2	1.125	1	0	0	0	0
no	51	Female	83	82		2019-02-01		159.005	48.8	19.3018	no	6	53	85.5	negative	negative	5	0	3	3	3	11	2	1.25	1	1	1	0	1
no	52	Female	65	65		2017-10-01		151	39.5	17.3238	no	6	65	18.6	Positive	Positive	23	8	6	6	6	43	3	2.25	1	0	0	0	0
no	53	Female	46	45		2016-01-01		150	57.8	25.6889	no	6	33	69.2	Positive	Positive	15	11	8	8	8	42	3	2.75	1	0	0	0	0
no	54	Female	57	56		2019-01-01		162	48	18.2899	no	7	79	11.9	Positive	Positive	6	3	6	5	2	20	2	0.75	1	1	0	0	0
yes	55	Female	71	71	65.937	2021-03-03	2016-01-01	150	52.3	23.2444	no	7	127	49.1	negative	negative	16	14	6	6	6	42	3	1.25	1	1	0	0	0
no	56	Female	60	59		2017-02-01		156	54.7	22.477	no	7	53	3.02	Positive	Positive	1	0	1	1	2	3	1	0.25	1	0	0	0	0
no	57	Female	30	29		2015-02-01		163	47.7	17.9533	no	7	12	3.28	Positive	Positive	4	4	1	1	2	10	2	0	0	0	0	0	0
no	58	Female	51	50.4167		2019-02-01		160.005	61.8	24.1391	no	7	25	3.11	Positive	Positive	3	3	3	2	2	11	2	0.125	1	1	0	1	0
no	59	Female	27	26		2015-04-01		160	59	23.0469	no	7	46	28.9	Positive	negative	7	7	3	3	2	20	2	0.12	1	1	0	0	1
no	60	Female	46	45.5		2019-12-01		160	68	26.5625	no	7	32	10.4	Positive	Positive	12	12	7	7	7	38	3	1	1	0	0	0	0
no	61	Female	51	50.4167		2020-01-03		159	58.1	22.9817	no	7	13	2.98	negative	Positive	1	0	0	0	2	1	0	0	0	0	0	0	0
no	62	Female	42	41.3333		2020-01-01		156	80.3	32.9964	no	8	10	3.11	Positive	Positive	5	3	3	3	5	14	2	0	0	0	0	0	0
no	63	Female	43	43		2016-02-01		161	53.9	20.794	no	8	15	3.16	Positive	Positive	3	5	3	3	0	14	2	0	0	0	0	0	0
no	64	Female	45	44		2017-02-01		155	56	23.3091	no	8	20	3.12	Positive	Positive	3	0	2	2	2	7	1	0	0	1	0	0	0
no	65	Female	60	59		2015-11-01		163	66.4	24.9915	no	8	11	3.16	Positive	Positive	3	2	2	2	4	9	1	0.25	1	0	0	0	0
no	66	Female	50	49		2018-05-01		160	56.2	21.9531	no	8	37	3.23	negative	negative	0	0	0	0	2	0	0	0	0	0	0	0	1
no	67	Female	36	35		2016-08-01		165	40.9	15.023	no	8	67	29	Positive	Positive	2	2	6	6	6	16	2	0.75	1	0	0	0	1
no	68	Female	58	58		2016-06-01		162	72.5	27.6254	no	8	7	3.11	negative	Positive	18	2	7	7	5	34	3	1	1	0	1	0	0
no	69	Female	25	24		2016-08-01		157	52.9	21.4613	no	8	49	12.7	Positive	Positive	3	2	1	1	4	7	1	0.375	1	0	0	0	0
no	70	Female	36	35		2015-01-01		153	56.6	24.1787	no	8	20	3.28	negative	Positive	3	1	5	4	4	13	2	0.25	1	0	0	0	0
no	71	Female	23	23		2020-07-09		148	53.1	24.2421	no	8	90	39.9	Positive	Positive	24	21	6	6	6	57	3	1.375	1	0	0	0	0
no	72	Female	33	33		2020-08-01		159	49.6	19.6195	no	9	50	33.9	Positive	negative	1	1	6	5	4	13	2	0.125	1	0	1	0	1
no	73	Female	31	30		2015-04-15		152	43.7	18.9145	no	9	43	4.67	Positive	Positive	5	1	5	5	4	16	2	0.75	1	0	0	0	1
no	74	Female	41	40.25		2019-03-01		167	55.3	19.8286	no	9	20	3.14	Positive	Positive	1	1	2	2	2	6	1	0	0	0	0	0	0
no	75	Female	51	50		2014-12-01		162	58.9	22.4432	no	9	5	3.28	Positive	Positive	0	0	2	1	1	3	1	0	0	0	0	0	0
no	76	Female	58	57		2020-05-09		159	44.5	17.6022	no	9	8	3.3	negative	Positive	0	0	0	0	0	0	0	0	0	1	0	0	1
no	77	Female	50	49		2020-04-19		159	61.4	24.287	no	9	7	3.3	negative	negative	2	0	4	4	5	10	2	0.25	1	1	0	0	1
no	78	Female	66	65		2020-03-01		152	46.7	20.213	no	9	96	67.2	negative	Positive	8	8	6	6	5	28	3	1.875	1	1	0	0	1
no	79	Female	44	44		2015-02-01		152	56.8	24.5845	yes	9	35	6.77	Positive	Positive	3	3	5	5	4	16	2	0.38	1	0	0	0	0
no	80	Female	62	61		2014-12-01		146	48.5	22.7529	no	9	22	3.28	negative	negative	3	1	0	1	2	5	1	0	0	0	0	0	0
no	81	Female	47	46		2018-05-01		153	55.4	23.6661	no	9	81	20.5	Positive	Positive	1	3	2	2	2	8	1	0	0	0	0	0	0
no	82	Female	62	62		2017-01-01		151	41.2	18.0694	no	9	18	3.02	negative	negative	2	2	2	2	2	8	1	0.375	1	0	0	0	0
no	83	Female	53	52		2019-10-12		153	49	20.9321	no	9	72	26.1	Positive	Positive	4	8	6	6	6	24	3	0.75	1	0	0	0	1
no	84	Female	49	48		2020-01-26		153	52.5	22.4273	no	9	75	25.3	Positive	Positive	3	6	4	4	2	17	2	0.625	1	1	1	0	1
no	85	Female	64	63		2019-10-12		156	56.2	23.0934	no	9	84	10.1	Positive	Positive	7	2	2	2	0	13	2	0	0	0	0	0	0
no	86	Female	38	37		2015-01-01		154	43.6	18.3842	no	9	5	3.28	negative	negative	2	2	1	1	2	6	1	0.5	1	1	1	0	0
no	87	Female	55	54		2020-04-26		156	61.8	25.3945	no	10	21	3.3	negative	Positive	3	3	5	3	2	14	2	0.625	1	0	0	0	1
no	88	Female	48	47		2015-05-01		158	53.8	21.551	no	10	67	27.4	Positive	Positive	7	8	3	4	4	22	3	0.625	1	0	0	0	1
no	89	Female	47	46		2017-05-01		160	52	20.3125	no	10	29	21.1	Positive	Positive	14	12	8	8	6	42	3	0.875	1	0	0	0	1
no	90	Female	50	49		2016-09-01		158	49.5	19.8286	no	10	87	75.4	Positive	negative	4	5	5	5	3	19	2	0.375	1	0	0	0	0
no	91	Female	51	50		2016-12-01		153	59.9	25.5884	no	10	79	122	negative	Positive	13	10	9	9	9	41	3	2.875	1	0	0	0	1
no	92	Female	54	53		2020-12-03		170	54.3	18.7889	no	10	50	5.08	negative	Positive	4	0	4	2	2	10	2	0	0	0	0	0	1
no	93	Female	32	31		2016-10-01		161	60.3	23.263	no	11	15	3.02	negative	Positive	0	0	0	0	0	0	0	0	0	0	0	0	1
no	94	Female	25	24		2016-11-01		150	50.2	22.3111	no	11	7	3.37	Positive	Positive	2	2	2	2	2	8	1	0	0	0	0	1	1
no	95	Female	27	25				158	40.8	16.3435	no	11	8	3.02	Positive	Positive	4	0	7	7	7	18	2	0.25	1	0	1	0	0
no	96	Female	61	60		2016-03-01		156	58.5	24.0385	no	11	52	11.6	Positive	Positive	6	5	5	5	4	21	2	1	1	0	0	0	0
no	97	Female	48	48		2018-07-01		154	51.8	21.8418	no	11	35	3.13	negative	negative	0	0	1	1	0	2	0	0	0	0	0	0	0
no	98	Female	51	50		2014-11-01		158	59.1	23.6741	no	11	35	3.05	Positive	Positive	1	1	1	1	2	4	1	0	0	0	0	0	0
no	99	Female	51	50		2016-07-01		155	46.4	19.3132	no	11	95	61	negative	negative	12	10	6	6	4	34	3	1.75	1	0	0	0	0
no	100	Female	51	50		2020-07-22		160	55.9	21.8359	no	11	73	4.12	Positive	Positive	1	1	6	5	4	13	2	0.25	1	0	0	0	1
no	101	Female	56	55		2014-10-01		162	88.1	33.5696	no	11	11	3.44	Positive	Positive	1	1	4	2	2	8	1	0	0	0	1	0	0
no	102	Female	38	37		2014-12-01		158	69.6	27.8801	no	11	51	13.9	negative	negative	4	4	5	5	4	18	2	0.12	1	0	0	0	0
no	103	Female	39	38		2016-05-01		153	52.2	22.2991	no	12	20	14	Positive	Positive	1	1	2	0	0	4	1	0	0	0	0	0	0
no	104	Female	56	55		2015-08-01		147	42	19.4363	no	12	45	21.2	negative	Positive	3	3	2	2	4	10	2	0	0	0	0	0	0
no	105	Female	57	56		2019-09-01		158	59.7	23.9144	no	12	21	4.76	Positive	Positive	4	4	4	4	6	16	2	0.125	1	1	0	1	1
no	106	Female	24	23		2014-09-01		163	56.9	21.4159	no	12	21	3.28	Positive	Positive	0	0	5	3	2	8	1	0	0	0	0	0	0
no	107	Female	66	65		2018-04-01		145	56.2	26.7301	no	12	28	3.13	negative	negative	5	1	5	5	6	16	2	0.125	1	0	0	0	1
no	108	Female	29	28		2018-05-01		158	48.7	19.5081	no	12	7	3.95	Positive	Positive	5	3	4	4	4	16	2	0.625	1	0	0	1	1
no	109	Female	24	23		2016-05-01		166	47.3	17.165	no	12	45	4.93	Positive	Positive	9	10	10	10	7	39	3	2.625	1	0	0	0	0
no	110	Female	37	36		2015-03-01		160	46.1	18.0078	no	12	35	11.1	Positive	Positive	10	10	2	2	2	24	3	0.125	1	1	0	0	1
no	111	Female	64	63		2015-07-01		154	42.6	17.9626	no	12	74	13.7	Positive	Positive	13	11	5	5	4	34	3	1.125	1	0	0	0	0
no	112	Female	57	56		2017-06-01		154	58.9	24.8356	no	12	37	12	Positive	Positive	3	3	7	7	4	20	2	0	0	0	0	0	1
no	113	Female	21	20		2017-07-01		163	49.4	18.5931	no	12	21	17.4	Positive	Positive	18	21	6	7	4	52	3	1.375	1	0	0	0	0
no	114	Female	59	58		2018-05-01		159	58.2	23.0212	no	12	17	3.13	Positive	Positive	22	10	6	6	3	44	3	1.375	1	1	1	0	0
no	115	Female	36	35		2014-10-01		158	45.1	18.066	no	12	25	40.2	negative	negative	7	5	4	4	4	20	2	0	0	0	0	0	1
no	116	Female	61	60		2014-12-01		168	53	18.7783	no	12	30	3.3	Positive	Positive	0	0	2	2	0	4	1	0	0	0	0	0	0
no	117	Female	39	38		2014-11-01		163	54.9	20.6632	no	12	47	3.3	negative	Positive	5	5	6	6	4	22	3	1.12	1	0	0	0	0
no	118	Female	36	35		2018-04-01		153	41.5	17.7282	no	12	70	3.13	Positive	negative	11	6	5	5	5	27	3	1.875	1	0	0	0	0
no	119	Female	59	58		2019-10-12		150	52.2	23.2	no	12	41	3.3	negative	negative	28	10	6	6	5	50	3	2	1	1	1	0	1
no	120	Female	51	49				158	72.2	28.9216	no	12	75	19.1	Positive	Positive	3	3	2	2	2	10	2	0	0	1	0	0	0
no	121	Female	69	68		2016-03-01		158	66.8	26.7585	no	12	25	7.22	Positive	Positive	7	1	6	6	4	20	2	1	1	0	0	0	1
no	122	Female	34	33		2017-03-01		158	68.6	27.4796	no	12	8	3.27	Positive	Positive	3	3	0	0	1	6	1	0	0	0	0	0	0
no	123	Female	74	73		2015-03-01		150	46.5	20.6667	no	12	104	41.7	Positive	Positive	15	12	8	8	7	43	3	1	1	1	1	1	1
no	124	Female	67	66		2017-05-01		163	56.3	21.1901	yes	12	65	8.83	Positive	negative	1	0	2	2	1	5	1	0.375	1	0	0	0	0
no	125	Female	34	33		2014-10-20		157	54.7	22.1916	no	12	15	3.28	negative	Positive	0	0	0	0	0	0	0	0	0	0	0	0	0
no	126	Female	61	60		2014-11-01		150	55.6	24.7111	no	12	72	7.24	negative	Positive	0	0	0	0	0	0	0	0	0	0	0	0	0
no	127	Female	54	53		2018-07-01		153	47.7	20.3768	no	12	26	3.11	negative	Positive	2	0	2	2	2	6	1	0	0	0	0	0	0
no	128	Female	68	67		2014-11-01		158	57.1	22.8729	no	12	42	3.3	negative	negative	1	0	5	3	4	9	1	0.38	1	0	0	0	1
no	129	Female	42	41		2016-04-01		155	60.1	25.0156	no	12	25	10.4	Positive	Positive	7	7	2	2	3	18	2	0.125	1	0	0	0	0
no	130	Female	35	33		2020-04-15		158	51	20.4294	no	12	100	86.3	Positive	Positive	6	4	5	5	6	20	2	0.875	1	1	0	1	1
no	131	Female	55	54		2020-08-03		160	59.9	23.3984	no	12	138	133	Positive	negative	9	7	1	4	2	21	2	0.875	1	0	0	0	0
no	132	Female	40	39		2019-12-01		158	39.1	15.6626	no	12	124	58.6	Positive	Positive	11	0	4	3	3	18	2	0.375	1	0	0	0	1
no	133	Female	61	60		2016-08-01		152	55.7	24.1084	no	12	26	3.02	Positive	Positive	0	0	1	1	1	2	0	0.125	1	0	0	0	0
no	134	Female	46	45		2014-12-01		160	55.8	21.7969	no	12	15	61.6	Positive	Positive	3	3	3	3	4	12	2	0.5	1	0	0	0	0
no	135	Female	45	44		2020-03-07		155	46.1	19.1883	no	13	12	0.7	Positive	Positive	1	1	5	3	2	10	2	0	0	1	1	0	0
no	136	Female	40	39		2017-06-19		154	58.2	24.5404	no	13	11	3.23	Positive	negative	1	0	2	2	2	5	1	0.25	1	1	1	0	1
no	137	Female	44	43		2019-02-01		160	58.8	22.9688	no	13	12	3.14	negative	Positive	1	0	2	2	2	5	1	0	0	0	0	0	1
no	138	Female	30	29		2014-07-11		155	52.7	21.9355	no	13	13	3.28	Positive	Positive	2	2	1	1	2	6	1	0	0	1	0	0	1
no	139	Female	70	69		2014-12-01		152	50.4	21.8144	no	14	47	4.58	Positive	Positive	3	3	4	4	4	14	2	0.5	1	0	0	0	0
no	140	Female	52	51		2014-07-01		164	53.1	19.7427	no	14	7	3.28	negative	Positive	1	0	1	1	1	3	1	0	0	0	0	0	0
no	141	Female	28	27		2014-08-01		162	44.8	17.0706	no	14	5	3.28	negative	Positive	0	0	1	1	2	2	0	0	0	0	0	0	0
no	142	Female	37	36		2017-04-01		160	54.7	21.3672	no	14	25	8.57	negative	Positive	6	6	5	5	4	22	3	0.125	1	0	0	0	0
no	143	Female	51	50		2019-09-09		155	53.8	22.3933	no	14	39	6.14	Positive	Positive	12	8	4	4	4	28	3	1.875	1	0	0	0	1
no	144	Female	50	49		2014-06-01		161	61.6	23.7645	no	15	26	3.28	Positive	Positive	0	0	0	0	2	0	0	0	0	0	0	1	1
no	145	Female	50	49		2020-08-10		150	66.1	29.3778	no	15	65	74.3	Positive	Positive	7	7	9	9	7	32	3	1.875	1	0	0	0	0
no	146	Female	27	26		2016-12-01		162	54.1	20.6142	no	15	30	13.6	negative	negative	1	1	2	2	2	6	1	0	0	0	0	0	0
no	147	Female	46	45		2018-04-06		158	57.2	22.913	no	15	19	3.11	Positive	negative	1	0	1	1	1	3	1	0	0	1	0	0	0
no	148	Female	56	55		2016-04-01		150	45.9	20.4	no	15	76	36.8	Positive	Positive	22	17	9	9	8	57	3	2.75	1	1	1	0	1
no	149	Female	33	32		2020-03-22		155	41.7	17.3569	no	15	15	5	Positive	Positive	16	14	9	8	5	47	3	1.5	1	0	0	0	0
no	150	Female	35	34		2020-06-01		158	51.3	20.5496	yes	16	50	3.13	Positive	Positive	8	3	5	4	2	20	2	0.875	1	1	1	0	1
no	151	Female	23	22				155	43.9	18.2726	no	16	12	3.28	negative	negative	0	0	1	1	2	2	0	0	0	1	0	0	1
no	152	Female	35	34				160	61.3	23.9453	no	16	9	3.13	Positive	Positive	0	1	0	0	0	1	0	0	0	0	0	0	1
no	153	Female	52	51				158	60.4	24.1948	no	17	26	3.02	Positive	Positive	2	1	7	4	5	14	2	0.875	1	0	0	0	0
yes	154	Female	47	46	42.9288	2017-02-03	2013-07-01	146	50.3	23.5973	no	17	8	3.23	negative	negative	0	0	0	0	0	0	0	0	0	0	0	0	0
no	155	Female	33	32				163	59.1	22.244	no	17	7	3.23	negative	Positive	0	0	0	0	0	0	0	0	0	1	1	1	1
no	156	Female	21	20				156	39.2	16.1078	no	18	68	52	Positive	Positive	9	9	5	5	6	28	3	2.25	1	1	0	0	0
no	157	Female	43	42				165	61	22.4059	no	18	14	3.12	negative	negative	1	5	3	3	2	12	2	0.25	1	0	0	0	0
no	158	Female	48	47				149	40.7	18.3325	no	18	28	3.11	negative	Positive	5	0	3	3	4	11	2	0.25	1	0	1	0	0
no	159	Female	40	39				162	47.7	18.1756	no	18	25	1.06	negative	Positive	1	0	0	0	2	1	0	0	0	0	0	0	1
yes	160	Female	47	46	51.2493	2016-10-11	2021-11-24	160	53.6	20.9375	no	18	93	108	negative	negative	22	28	10	10	4	70	3	1.125	1	1	0	0	0
no	161	Female	48	47				158.005	52.5	21.029	no	18	14	3.11	Positive	negative	0	0	1	1	0	2	0	0	0	0	0	0	0
no	162	Female	71	70				154	69.1	29.1364	no	18	53	41	Positive	Positive	3	1	3	3	4	10	2	0.25	1	1	0	0	0
no	163	Female	58	57				160	55.6	21.7188	no	18	14	1.1	Positive	Positive	0	0	0	0	0	0	0	0	0	0	1	0	1
no	164	Female	35	34				152	42.7	18.4816	no	18	11	3.11	Positive	Positive	1	1	1	1	1	4	1	0	0	0	0	0	0
no	165	Female	56	55				150	59.3	26.3556	no	18	22	4.73	negative	negative	1	1	0	0	2	2	0	0	0	0	0	0	0
no	166	Female	45	44				160	53.3	20.8203	no	18	26	3.28	negative	negative	0	0	0	0	0	0	0	0	0	0	0	0	0
no	167	Female	36	35				162	47.4	18.0613	no	18	6	3.3	Positive	negative	0	0	1	1	2	2	0	0	0	0	0	0	0
no	168	Female	42	40				166	57.8	20.9755	no	19	14	3.13	negative	Positive	0	0	0	0	0	0	0	0	0	1	0	0	1
no	169	Female	42	40				150	63.2	28.0889	no	19	40	3.13	negative	negative	0	0	0	0	0	0	0	0	0	0	0	0	0
no	170	Female	52	51		2014-08-01		160	58.1	22.6953	no	19	33	7.19	negative	negative	5	5	3	3	2	16	2	0	0	0	0	0	1
no	171	Female	44	42.4167				154	53.1	22.3899	no	19	10	3.11	Positive	Positive	1	1	2	2	3	6	1	0	0	1	0	0	0
no	172	Female	48	46				170	61	21.1073	no	19	8	3.02	negative	negative	0	0	2	2	2	4	1	0	0	1	1	0	0
yes	173	Female	45	43	46.4027	2014-01-01	2016-01-21	158	49.8	19.9487	no	20	5	3.28	Positive	Positive	3	2	3	3	2	11	2	0.38	1	0	0	0	1
no	174	Female	55	53				154	52.4	22.0948	no	20	92	47.4	Positive	Positive	15	15	7	7	4	44	3	1.25	1	0	0	0	0
no	175	Female	38	36				158	60.3	24.1548	no	21	38	3.28	Positive	Positive	5	3	8	8	4	24	3	0.75	1	0	0	0	0
no	176	Female	40	38.25				146	48.4	22.7059	no	21	15	3.14	negative	negative	13	6	2	3	2	24	3	0.875	1	0	0	0	0
no	177	Female	58	56		2019-04-12		153	56.8	24.2642	no	21	21	3.3	Positive	negative	0	0	0	0	2	0	0	0	0	0	0	0	0
no	178	Female	31	29.25				162	50	19.052	no	21	118	29.9	Positive	Positive	9	3	4	3	3	19	2	0.5	1	0	0	0	0
no	179	Female	32	30		2019-06-25		165	57.3	21.0468	yes	21	33	3.68	Positive	Positive	3	3	2	2	5	10	2	0	0	0	0	0	1
no	180	Female	34	33		2019-10-01		152	53.1	22.983	no	21	56	46	Positive	Positive	6	5	6	7	4	24	3	0.75	1	0	0	0	0
no	181	Female	29	27				160	46.8	18.2812	no	21	12	3.3	Positive	Positive	0	0	0	0	1	0	0	0	0	0	1	0	0
no	182	Female	64	62.1667				158	47.4	18.9873	no	22	50	3.14	Positive	Positive	2	0	2	2	2	6	1	0.375	1	0	0	0	0
no	183	Female	42	40		2019-07-21		152	44.9	19.4339	no	22	27	3.3	Positive	Positive	3	2	4	4	3	13	2	0	0	0	0	0	0
no	184	Female	30	29		2014-01-01		162	46.5	17.7183	no	22	28	3.3	negative	negative	0	0	3	3	2	6	1	0	0	0	0	0	0
no	185	Female	63	61		2019-01-01		153	45.8	19.5651	yes	22	22	3.3	negative	negative	5	4	3	3	2	15	2	1.375	1	0	0	0	1
no	186	Female	55	53				160	52.6	20.5469	no	22	53	3.13	negative	negative	5	0	2	2	3	9	1	0	0	0	0	0	0
no	187	Female	72	70		2019-04-09		153	58.9	25.1613	no	23	41	3.13	Positive	negative	2	0	4	4	4	10	2	0.375	1	1	0	0	1
no	188	Female	64	64		2014-02-01		160	68.5	26.7578	no	23	14	3.3	negative	negative	17	9	1	1	3	28	3	0	0	1	0	0	1
no	189	Female	75	73				152	57.4	24.8442	yes	23	44	11.5	Positive	Positive	0	0	2	2	2	4	1	0.12	1	1	0	0	0
no	190	Female	46	44		2019-12-03		158	47.9	19.1876	no	23	12	2.86	negative	negative	3	2	7	7	6	19	2	0	0	0	0	0	0
no	191	Female	55	53		2019-12-03		162	57	21.7193	no	23	78	11.8	Positive	negative	10	10	5	5	4	30	3	1.375	1	1	0	0	1
no	192	Female	20	18		2019-02-09		158	46	18.4265	no	23	2	3.13	negative	Positive	1	0	2	2	2	5	1	0.25	1	0	0	0	0
no	193	Female	65	63				150	50.5	22.4444	no	23	40	3.28	negative	negative	22	10	9	8	6	49	3	0.625	1	0	0	0	0
no	194	Female	50	48				155	47.1	19.6046	no	24	93	61.5	negative	negative	1	1	4	4	4	10	2	0.62	1	0	0	0	0
no	195	Female	46	44				165	64.7	23.7649	no	24	19	7.69	Positive	Positive	0	0	4	2	0	6	1	0	0	0	0	0	0
no	196	Female	46	44				157	52.6	21.3396	no	24	20	3.11	negative	Positive	23	16	5	5	6	49	3	0.875	1	0	0	0	0
no	197	Female	64	62				150	48.8	21.6889	no	24	10	3.02	negative	negative	2	2	1	1	2	6	1	0	0	0	0	0	1
no	198	Female	49	47				150	63.6	28.2667	no	24	27	5.23	Positive	Positive	6	0	2	2	2	10	2	0.125	1	1	1	0	0
no	199	Female	28	26				152	42.1	18.222	no	24	27	8.95	negative	negative	1	1	3	3	6	8	1	0.125	1	0	0	0	0
no	200	Female	52	50				148	40	18.2615	no	24	26	17.9	Positive	Positive	1	2	1	1	0	5	1	0	0	1	0	0	0
no	201	Female	69	67				155	61.9	25.7648	no	24	25	3.98	Positive	Positive	8	4	2	2	6	16	2	1	1	1	1	0	1
no	202	Female	39	37				156	48.3	19.8471	no	24	28	3.16	negative	negative	1	1	3	3	4	8	1	0.625	1	0	0	0	1
no	203	Female	69	67				150	43.5	19.3333	no	24	58	3.28	negative	Positive	5	4	2	2	2	13	2	0	0	0	0	0	0
no	204	Female	49	47				159	48.8	19.303	no	24	59	20.6	negative	Positive	9	8	1	2	2	20	2	0	0	0	0	0	0
no	205	Female	65	63		2019-05-08		148	39.7	18.1245	no	24	25	36.2	Positive	Positive	0	0	5	4	1	9	1	0	0	0	0	0	0
no	206	Female	44	42				161	55.4	21.3726	no	24	117	77.2	negative	Positive	5	1	5	3	3	14	2	0.5	1	0	0	0	0
no	207	Female	63	61				155	50.8	21.1446	no	24	64	12.7	Positive	Positive	20	18	10	10	6	58	3	1.25	1	0	0	0	0
no	208	Female	61	58				158.005	59.5	23.8328	no	24	4	3.08	negative	negative	0	0	0	0	1	0	0	0	0	0	0	0	0
no	209	Female	47	46		2014-03-01		150	50	22.2222	no	24	13	3.3	Positive	Positive	0	0	1	1	0	2	0	0	0	0	0	0	0
no	210	Female	56	54				150	53.7	23.8667	no	24	30	3.55	negative	Positive	0	1	0	0	0	1	0	0	0	1	0	0	0
no	211	Female	46	44				161	55.7	21.4884	no	24	5	3.28	Positive	Positive	0	0	3	3	2	6	1	0	0	0	0	0	0
no	212	Female	60	58				150	53.3	23.6889	no	24	61	10.3	Positive	Positive	14	9	5	5	4	33	3	0.5	1	1	0	0	0
no	213	Female	35	33				156	42.5	17.4638	no	24	10	3.28	negative	Positive	2	2	8	4	6	16	2	0.875	1	0	0	0	1
no	214	Female	37	35				159	66	26.1066	no	24	7	3.6	negative	negative	0	0	0	0	0	0	0	0	0	0	0	0	0
no	215	Female	71	69				150	46.8	20.8	no	24	125	98.1	Positive	Positive	12	6	6	6	6	30	3	1.5	1	0	0	0	0
no	216	Female	50	48				153	47.8	20.4195	no	24	97	78.7	Positive	Positive	4	4	6	6	4	20	2	0.625	1	0	0	0	1
no	217	Female	52	50				147	44.7	20.6858	no	24	75	35.3	Positive	Positive	12	7	5	4	4	28	3	0.5	1	0	0	0	0
no	218	Female	59	57		2013-02-01		150	42.7	18.9778	no	24	38	3.28	negative	Positive	3	0	4	4	2	11	2	0.625	1	1	0	0	0
no	219	Female	26	24				158	52.7	21.1104	no	24	18	8.14	negative	negative	14	9	8	8	8	39	3	2.875	1	0	0	0	0
no	220	Female	47	45				162	55.7	21.2239	no	24	20	19.8	negative	negative	1	3	0	0	2	4	1	0	0	1	0	0	0
no	221	Female	41	39				160	61	23.8281	no	24	26	3.3	Positive	negative	1	1	2	2	4	6	1	0	0	0	0	0	0
no	222	Female	46	44				156	60	24.6548	no	24	24	8.6	Positive	Positive	0	0	2	2	0	4	1	0	0	1	0	0	1
no	223	Female	52	50				155	61.9	25.7648	no	24	40	7.49	negative	Positive	7	1	3	3	4	14	2	0.62	1	1	0	1	1
no	224	Female	48	46				156	57.4	23.5865	no	24	12	3.3	negative	Positive	0	0	1	1	0	2	0	0.125	1	1	0	1	0
no	225	Female	31	29				168	65.7	23.2781	no	24	16	3.28	Positive	Positive	0	0	0	0	0	0	0	0	0	0	0	0	0
no	226	Female	56	54				155	48.7	20.2706	no	24	117	77.1	negative	Positive	5	3	3	3	4	14	2	0.625	1	0	0	0	1
no	227	Female	53	51		2019-07-24		160	56.7	22.1484	no	25	47	8	Positive	Positive	11	8	6	6	6	31	3	0.125	1	1	0	0	0
no	228	Female	33	30.9167				164	62.8	23.3492	no	25	10	3.14	Positive	Positive	2	2	2	2	2	8	1	0	0	1	0	0	0
no	229	Female	54	52				158	63.8	25.5568	no	25	47	18.2	negative	negative	8	2	3	3	2	16	2	0.25	1	0	0	0	0
no	230	Female	38	36				160	50	19.5312	no	26	14	0.16	Positive	negative	4	3	3	3	2	13	2	0.38	1	0	0	0	0
no	231	Female	59	56.75				160	67.9	26.5234	no	27	81	4.7	Positive	Positive	4	0	4	4	3	12	2	0.25	1	0	0	0	0
no	232	Female	28	26				155	45.6	18.9802	no	27	9	0.82	negative	Positive	0	0	1	1	0	2	0	0	0	1	0	0	0
no	233	Female	48	46				157	59.9	24.3012	no	27	20	3.28	Positive	Positive	0	0	1	1	0	2	0	0.12	1	1	0	0	0
no	234	Female	35	33				152	41.2	17.8324	no	27	42	18.5	negative	Positive	2	1	6	4	6	13	2	1	1	0	0	0	0
no	235	Female	64	62				145	47.4	22.5446	no	28	30	6.25	Positive	Positive	2	0	4	2	2	8	1	0	0	0	1	0	1
no	236	Female	63	61		2018-12-06		150	47.7	21.2	no	28	43	3.3	Positive	Positive	14	5	8	6	7	33	3	1	1	1	1	1	0
no	237	Female	31	29				162	53.3	20.3094	no	28	8	3.28	Positive	Positive	0	0	0	0	2	0	0	0	0	0	0	0	1
no	238	Female	69	67				156	65.1	26.7505	no	29	23	3.3	negative	Positive	0	0	2	2	2	4	1	0	0	0	0	0	0
no	239	Female	48	46				147	68.3	31.6072	no	29	20	3.13	negative	negative	2	2	0	0	0	4	1	0.125	1	1	0	0	1
no	240	Female	49	47				158	55.6	22.2721	no	30	37	3.02	negative	Positive	1	1	6	5	8	13	2	0.625	1	0	0	0	0
yes	241	Female	55	52.5	55.2849	2017-05-29	2019-11-04	159	43.7	17.2857	no	30	47	15.5	Positive	Positive	8	4	7	7	7	26	3	2.125	1	0	0	0	0
no	242	Female	39	37				161	51	19.6752	no	30	15	3.28	Positive	Positive	0	0	0	0	0	0	0	0	0	0	0	0	0
no	243	Female	24	22				158	47.4	18.9873	no	30	27	12.8	Positive	Positive	3	0	7	7	4	17	2	0.25	1	1	0	0	0
no	244	Female	32	31		2016-01-01		152	42.8	18.5249	no	30	53	27.3	negative	Positive	8	2	2	2	2	14	2	0.375	1	1	0	0	0
no	245	Female	51	49				160	50.7	19.8047	no	30	17	3.28	Positive	Positive	3	2	4	4	2	13	2	0.25	1	0	0	0	0
no	246	Female	50	48				154	51.2	21.5888	no	30	35	6.77	Positive	Positive	2	1	3	3	3	9	1	0	0	0	0	0	0
no	247	Female	58	56				150	57.8	25.6889	no	30	14	3.3	Positive	Positive	4	1	0	0	2	5	1	0	0	0	0	0	1
no	248	Female	56	54				157	59.7	24.22	no	30	21	3.3	Positive	Positive	1	0	2	2	2	5	1	0	0	0	0	0	1
no	249	Female	28	26				155	44.7	18.6056	no	30	29	12.3	Positive	Positive	5	1	1	1	2	8	1	0.125	1	0	0	0	1
no	250	Female	47	47		2013-04-01		160	69.1	26.9922	no	31	27	4.73	Positive	Positive	1	1	5	5	4	12	2	0.625	1	0	0	0	0
no	251	Female	38	35				165	71.7	26.3361	no	31	24	3.13	negative	Positive	2	1	5	5	4	13	2	0.375	1	0	0	0	0
no	252	Female	37	34				160	78.5	30.6641	no	32	13	3.16	Positive	Positive	0	0	0	0	0	0	0	0	0	1	0	0	1
no	253	Female	59	57		2019-01-12		164	60.9	22.6428	no	32	37	4.07	Positive	Positive	2	1	0	1	3	4	1	0	0	0	0	0	0
no	254	Female	53	50		2018-03-01		162	45.7	17.4135	no	33	77	14.1	Positive	Positive	7	1	2	2	1	12	2	0.125	1	1	0	0	0
no	255	Female	49	46				148	46.5	21.229	no	33	7	3.23	negative	negative	0	0	3	3	2	6	1	0	0	0	0	0	0
no	256	Female	56	53				148	45.5	20.7725	no	33	28	3.28	Positive	Positive	4	3	3	3	3	13	2	0	0	1	0	1	1
no	257	Female	50	47		2018-08-03		164	46.2	17.1773	no	33	13	3.13	Positive	Positive	0	0	0	0	0	0	0	0	0	0	0	0	0
no	258	Female	54	51.1667				158	61.3	24.5554	no	34	22	3.14	Positive	negative	5	0	3	3	1	11	2	0.25	1	0	0	0	0
no	259	Female	63	60		2018-01-01		161	59.7	23.0315	no	35	114	66.8	Positive	Positive	27	16	7	7	7	57	3	2.75	1	1	0	0	0
no	260	Female	38	35		2017-07-24		150	44.4	19.7333	no	35	40	5.93	negative	Positive	5	4	3	3	2	15	2	0	0	0	0	0	0
no	261	Female	73	70				149	52.5	23.6476	no	35	67	84.5	Positive	Positive	6	6	6	5	4	23	3	0.75	1	0	0	0	1
no	262	Female	54	51				157	48.2	19.5545	no	36	84	9.86	Positive	Positive	9	8	5	4	4	26	3	0.375	1	0	0	0	1
no	263	Female	54	51				150	63.8	28.3556	no	36	95	69.4	Positive	Positive	16	14	5	5	6	40	3	1	1	0	0	0	1
no	264	Female	56	53				154	59.8	25.215	no	36	72	35.5	Positive	Positive	12	5	7	7	6	31	3	1.375	1	0	0	0	0
no	265	Female	75	72				138	39.6	20.794	no	36	49	5.72	Positive	negative	2	1	5	5	2	13	2	0.25	1	0	0	0	0
no	266	Female	64	61				148	56.2	25.6574	no	36	18	3.28	Positive	negative	4	2	2	2	2	10	2	0	0	0	0	0	0
no	267	Female	33	30				159	57.3	22.6652	yes	36	76	14.2	Positive	Positive	2	2	5	5	4	14	2	0.5	1	0	0	0	0
no	268	Female	31	28				158	53.9	21.5911	no	36	27	3.28	Positive	Positive	0	0	2	2	4	4	1	0.25	1	0	0	1	0
no	269	Female	46	43				158	64.1	25.677	no	36	29	3.45	negative	Positive	0	0	0	0	0	0	0	0	0	0	0	0	0
no	270	Female	43	40				157	46.9	19.0271	no	36	33	5.55	Positive	Positive	5	4	3	3	2	15	2	0	0	0	0	0	0
no	271	Female	46	43				157	48.2	19.5545	no	36	4	3.3	negative	Positive	0	0	2	2	1	4	1	0	0	0	0	0	0
no	272	Female	51	48				151	50.5	22.1482	no	36	52	16	Positive	Positive	7	3	7	6	6	23	3	0.875	1	1	0	1	0
no	273	Female	35	32				155	48.3	20.1041	no	36	25	4.06	Positive	Positive	0	0	3	3	2	6	1	0	0	0	0	0	0
no	274	Female	52	49				152	42.6	18.4384	no	36	23	3.3	negative	Positive	3	2	6	4	4	15	2	0.5	1	0	0	0	1
no	275	Female	63	60		2018-11-10		156	61.4	25.2301	yes	36	25	3.91	Positive	Positive	9	3	5	1	4	18	2	0.25	1	0	0	0	0
no	276	Female	55	52				156	59.7	24.5316	no	36	51	34.2	negative	negative	5	5	2	2	2	14	2	0	0	0	0	0	0
no	277	Female	58	55				148	38.5	17.5767	no	36	26	3.28	Positive	Positive	3	0	1	1	2	5	1	0	0	0	0	0	0
no	278	Female	43	40				155	60.7	25.2653	no	36	107	9.12	Positive	Positive	14	13	7	6	3	40	3	0.75	1	0	0	0	0
no	279	Female	54	51				160	50.1	19.5703	no	36	53	5.58	Positive	Positive	4	4	8	8	8	24	3	1.375	1	0	0	0	0
no	280	Female	47	44				152	59.8	25.883	no	36	95	15.2	Positive	Positive	2	10	3	3	4	18	2	0.625	1	0	0	0	1
no	281	Female	56	53				151	63	27.6304	no	36	69	43.6	Positive	Positive	11	7	6	6	4	30	3	2.25	1	0	1	1	1
no	282	Female	56	53				158	53.1	21.2706	no	36	38	14.7	Positive	Positive	5	4	7	7	6	23	3	1.75	1	0	0	0	1
no	283	Female	57	54				155	56.5	23.5172	no	36	7	3.28	negative	negative	0	0	0	0	0	0	0	0	0	1	0	0	0
no	284	Female	65	62				163	48.4	18.2167	no	36	21	3.28	Positive	negative	4	1	5	5	3	15	2	0.375	1	1	0	0	0
no	285	Female	53	50				155	42.1	17.5234	no	36	8	3.3	Positive	negative	0	0	5	5	5	10	2	0.5	1	0	0	0	0
no	286	Female	67	64				165	76.3	28.0257	no	36	53	6.88	Positive	Positive	1	0	4	4	3	9	1	0.625	1	0	1	1	1
no	287	Female	60	57				150	45.3	20.1333	no	36	40	3.93	Positive	Positive	4	2	2	2	2	10	2	0.25	1	0	0	0	0
no	288	Female	23	20				158	37.6	15.0617	no	36	12	3.28	negative	Positive	0	0	1	1	2	2	0	0.12	1	1	0	0	1
no	289	Female	26	23				159	42.5	16.811	no	36	68	70.8	Positive	negative	8	6	2	2	4	18	2	0	0	1	1	0	1
no	290	Female	55	52				158	43.6	17.4651	no	36	8	3.3	Positive	Positive	0	0	0	0	0	0	0	0	0	0	0	0	1
yes	291	Female	66	63	65.5644	2012-11-26	2015-03-19	164	54.5	20.2632	yes	36	62	4.7	negative	Positive	0	0	0	0	0	0	0	0.12	1	1	1	0	1
no	292	Female	35	32				160	44.5	17.3828	no	36	17	3.11	Positive	Positive	1	1	2	2	2	6	1	0	0	0	0	0	0
no	293	Female	28	25				156	44.7	18.3679	no	36	13	3.14	negative	negative	2	1	1	1	1	5	1	0.125	1	1	0	1	0
no	294	Female	46	43				161	59	22.7615	no	36	23	12.6	Positive	Positive	0	0	1	1	0	2	0	0	0	0	0	0	0
no	295	Female	44	41				158	56.2	22.5124	no	36	33	3.02	negative	negative	0	0	0	0	0	0	0	0	0	1	0	0	0
no	296	Female	71	68				154	59.2	24.9621	no	36	22	4.71	Positive	Positive	1	1	0	0	0	2	0	0	0	0	0	0	0
no	297	Female	50	47				160	64	25	no	37	9	3.16	Positive	Positive	1	0	0	0	0	1	0	0	0	0	0	0	1
no	298	Female	25	22				160	50.2	19.6094	no	38	15	0.84	Positive	Positive	1	0	0	0	2	1	0	0	0	0	1	0	0
no	299	Female	37	33.75				159	51.6	20.4106	no	39	27	5.43	Positive	Positive	8	6	2	2	2	18	2	0.75	1	1	0	0	0
no	300	Female	18	15				161	41.6	16.0488	no	39	33	3.23	negative	Positive	1	0	0	0	2	1	0	0.125	1	0	0	0	1
no	301	Female	48	45				158	57.7	23.1133	no	40	44	5.32	negative	negative	4	2	7	7	4	20	2	0.5	1	0	0	0	0
no	302	Female	43	40				162	58.8	22.4051	no	40	6	3.3	Positive	Positive	1	0	1	1	2	3	1	0	0	1	1	0	1
no	303	Female	49	46				160	49.5	19.3359	no	40	35	3.3	Positive	Positive	3	3	3	3	2	12	2	0	0	1	0	0	0
no	304	Female	78	75		2017-10-09		148	42.3	19.3115	yes	41	91	6.11	Positive	Positive	9	2	5	5	4	21	2	1.125	1	1	0	0	0
no	305	Female	56	53				155	65.1	27.0968	no	41	8.17	33	negative	negative	0	0	2	2	1	4	1	0	0	0	0	0	0
no	306	Female	62	59				154	43.7	18.4264	no	42	32	4.6	Positive	negative	4	2	4	4	4	14	2	0.38	1	1	1	0	0
no	307	Female	55	51.5				158.005	63.6	25.4751	no	42	18	12.4	Positive	Positive	2	9	4	4	3	19	2	0.125	1	0	0	0	0
no	308	Female	65	62				148	42.5	19.4028	no	42	16	3.3	negative	negative	1	0	4	3	2	8	1	0.125	1	0	0	0	0
no	309	Female	66	63				161	65.3	25.1919	no	42	5	3.28	Positive	Positive	4	4	4	4	2	16	2	0	0	0	0	1	0
no	310	Female	30	27				162	68.8	26.2155	no	42	11	4.55	Positive	Positive	1	1	3	3	2	8	1	0.25	1	0	0	0	0
no	311	Female	51	48				160	48.3	18.8672	no	42	24	3.3	Positive	negative	2	2	3	3	2	10	2	0.25	1	1	0	0	1
no	312	Female	56	52.4167				148	45.4	20.7268	no	43	30	3.14	negative	negative	1	0	2	2	2	5	1	0	0	1	0	0	0
no	313	Female	42	38		2018-01-01		156	53.1	21.8195	no	43	22	3.13	Positive	negative	1	2	2	2	2	7	1	0	0	0	0	0	0
no	314	Female	56	53		2018-01-12		164	65.6	24.3902	no	43	90	38.5	Positive	Positive	3	3	6	6	6	18	2	0.5	1	0	1	0	0
no	315	Female	57	53		2017-12-01		160	64.9	25.3516	no	43	33	32.6	Positive	Positive	2	2	2	2	2	8	1	0	0	1	0	1	1
no	316	Female	51	47				152	51	22.0741	no	44	23	6.87	Positive	negative	4	1	6	5	2	16	2	0.62	1	0	0	0	0
no	317	Female	50	46				153	53.8	22.9826	no	45	24	3.28	negative	Positive	1	0	9	5	6	15	2	0.88	1	0	0	0	0
no	318	Female	57	53				163	48.6	18.292	no	45	67	0.7	Positive	Positive	3	2	4	4	5	13	2	1.625	1	1	0	0	0
no	319	Female	46	42				158	66.3	26.5582	no	46	36	7.34	Positive	Positive	2	2	2	4	4	10	2	0.375	1	0	0	0	0
no	320	Female	37	33				158	56.3	22.5525	no	46	27	20.8	Positive	Positive	4	4	5	5	4	18	2	0.38	1	0	0	0	1
no	321	Female	58	54		2016-05-21		146	45.4	21.2986	no	47	125	87.1	Positive	Positive	6	2	8	8	7	24	3	0.875	1	0	1	0	0
no	322	Female	56	52				155	61	25.3902	no	47	7	3.08	negative	negative	0	0	0	0	0	0	0	0	0	0	0	0	0
no	323	Female	62	58.0833				145	35.2	16.742	no	47	130	56.7	Positive	Positive	9	0	6	6	3	21	2	2.125	1	0	0	0	0
no	324	Female	50	46				146	44.2	20.7356	no	48	52	15.8	Positive	Positive	3	3	2	2	1	10	2	0	0	0	0	1	1
no	325	Female	20	16				147	32.8	15.1789	no	48	41	13.3	Positive	Positive	2	2	4	4	4	12	2	0.75	1	1	1	0	1
no	326	Female	46	42				159	70.6	27.9261	no	48	129	104	negative	Positive	14	5	7	7	4	33	3	0.75	1	0	0	0	0
no	327	Female	36	32				155	41	17.0656	no	48	23	3.28	negative	Positive	1	0	0	0	2	1	0	0	0	1	0	0	0
no	328	Female	49	45				160	69.4	27.1094	no	48	19	3.28	Positive	Positive	4	0	5	3	2	12	2	0.5	1	1	0	0	0
no	329	Female	59	55				148	53.8	24.5617	no	48	25	3.28	negative	negative	2	0	2	2	2	6	1	0.38	1	0	0	0	1
no	330	Female	30	26				153	49.5	21.1457	no	48	34	3.02	Positive	Positive	0	0	0	0	0	0	0	0	0	0	0	0	0
no	331	Female	28	24				166	50.3	18.2537	no	48	6	3.3	negative	Positive	1	2	2	2	2	7	1	0.25	1	0	0	0	0
no	332	Female	54	50				153	59.7	25.503	no	48	21	3.13	Positive	Positive	4	5	7	7	6	23	3	0.375	1	0	0	0	0
no	333	Female	25	21				163	58.8	22.1311	no	48	14	3.3	Positive	Positive	1	0	0	0	0	1	0	0	0	0	0	0	1
no	334	Female	54	50		2016-12-26		158	52.2	20.9101	no	48	10	3.3	negative	Positive	5	2	4	3	2	14	2	0.625	1	0	0	0	1
no	335	Female	43	39				165	69.2	25.4178	no	48	40	4.89	negative	negative	12	2	6	6	6	26	3	1.375	1	1	0	0	0
no	336	Female	76	72				150	47.3	21.0222	yes	48	87	32	Positive	negative	2	3	8	8	4	21	2	1.25	1	0	0	1	0
no	337	Female	40	36				150	54.6	24.2667	no	48	12	3.13	negative	negative	1	0	0	0	1	1	0	0	0	0	0	0	0
no	338	Female	56	52				144	48.2	23.2446	no	48	78	77.7	Positive	Positive	21	17	8	8	4	54	3	2.125	1	0	0	0	1
no	339	Female	62	58				155	51.3	21.3528	no	48	59	14.9	Positive	Positive	0	0	6	6	4	12	2	0.75	1	0	0	0	1
no	340	Female	54	50				152	55.8	24.1517	no	48	30	3.16	Positive	Positive	0	0	0	0	0	0	0	0.125	1	1	0	0	0
no	341	Female	50	46				160	53.1	20.7422	no	48	1	3.11	negative	negative	0	0	0	0	0	0	0	0	0	0	0	0	1
no	342	Female	46	42				160	54.6	21.3281	no	48	14	0.82	Positive	Positive	0	0	0	0	2	0	0	0	0	1	0	0	0
no	343	Female	44	40				157	46.2	18.7432	yes	48	63	52.8	Positive	Positive	1	1	1	1	1	4	1	0.25	1	0	0	0	0
no	344	Female	29	25				153	48.3	20.6331	no	48	17	3.13	negative	Positive	4	4	2	2	3	12	2	0.125	1	0	0	0	0
no	345	Female	55	51				159	54	21.3599	no	48	42	3.39	Positive	Positive	8	7	0	0	4	15	2	0.25	1	0	0	0	0
no	346	Female	52	48				155	49	20.3954	no	48	35	14.6	negative	negative	7	5	3	3	3	18	2	0	0	0	0	0	0
no	347	Female	61	57				158	49.9	19.9888	no	48	23	3.02	Positive	Positive	0	0	0	0	0	0	0	0	0	0	0	0	0
no	348	Female	47	43				158	52.3	20.9502	no	48	26	1.68	negative	Positive	1	0	0	0	2	1	0	0.125	1	1	0	0	0
no	349	Female	61	57				164	73	27.1416	no	48	20	53.2	Positive	Positive	1	3	6	6	4	16	2	0.125	1	1	1	0	0
no	350	Female	58	54				158	49.1	19.6683	no	48	26	3.28	Positive	negative	4	2	2	2	2	10	2	0.12	1	0	1	0	0
no	351	Female	51	47				163	67	25.2174	no	50	47	7.12	Positive	Positive	9	1	7	7	3	24	3	1	1	1	0	0	0
no	352	Female	52	47.8333				163	60.5	22.7709	no	50	95	79.4	Positive	Positive	9	6	4	4	5	23	3	1.5	1	0	1	0	1
no	353	Female	55	51				150	78	34.6667	no	52	24	3.02	Positive	Positive	1	0	3	3	4	7	1	0.125	1	1	0	0	1
no	354	Female	42	38				158	64.3	25.7571	no	53	37	40.8	negative	negative	0	0	0	0	1	0	0	0	0	0	0	0	0
no	355	Female	42	38				158	56.7	22.7127	no	54	8	3.3	negative	Positive	1	0	0	0	0	1	0	0	0	0	0	0	0
no	356	Female	43	39				155	57.2	23.8085	no	54	22	3.3	Positive	Positive	0	0	0	0	2	0	0	0	0	1	0	0	0
no	357	Female	36	32				168	49.6	17.5737	no	54	28	22.3	Positive	negative	2	2	5	5	4	14	2	0.125	1	0	0	0	1
no	358	Female	67	63		2016-07-23		158	54.6	21.8715	no	55	121	99.3	Positive	Positive	5	4	6	6	3	21	2	0.625	1	1	0	0	0
no	359	Female	75	70		2016-03-09		138	36.5	19.1661	no	56	79	69.3	Positive	negative	2	6	5	5	2	18	2	2.125	1	0	0	0	0
no	360	Female	52	47.25				159.005	53	20.963	no	57	42	3.48	Positive	Positive	14	7	6	6	5	33	3	1.75	1	0	0	0	1
no	361	Female	67	62		2017-01-01		150	44.4	19.7333	no	57	60	13.6	Positive	Positive	5	4	5	5	7	19	2	0.875	1	1	0	0	0
no	362	Female	54	49		2016-07-06		159	55.7	22.0324	no	57	17	3.3	negative	negative	0	1	2	2	2	5	1	0	0	0	0	0	0
no	363	Female	57	52				148	44.4	20.2703	no	57	74	67.3	Positive	negative	0	0	1	4	4	5	1	1.5	1	0	0	0	0
no	364	Female	61	56		2016-08-01		149	51.2	23.062	no	58	16	3.13	Positive	Positive	3	1	7	7	4	18	2	1.75	1	1	0	0	1
no	365	Female	63	58				156	56.8	23.3399	no	58	3	3.28	negative	negative	5	1	6	5	4	17	2	0.875	1	0	0	1	1
no	366	Female	32	27				155	50	20.8117	no	60	21	13.1	negative	negative	16	10	3	3	4	32	3	0.62	1	0	0	0	1
no	367	Female	45	40				158	67.4	26.9989	no	60	34	3.45	Positive	Positive	0	0	0	0	0	0	0	0	0	0	0	0	1
no	368	Female	62	57				153	57	24.3496	no	60	27	7.62	negative	Positive	0	0	0	0	0	0	0	0.125	1	1	0	0	0
no	369	Female	34	29				160	52.3	20.4297	no	60	12	3.28	negative	Positive	1	1	0	0	0	2	0	0	0	0	0	0	0
no	370	Female	77	72				147	40.3	18.6496	no	60	15	3.11	Positive	negative	22	11	5	5	3	43	3	1.125	1	1	0	1	0
no	371	Female	52	47				158	43.9	17.5853	no	60	21	3.28	negative	negative	2	2	4	2	2	10	2	0	0	0	0	0	1
no	372	Female	53	48				155	39.9	16.6077	no	60	25	3.02	negative	Positive	0	2	0	0	0	2	0	0	0	0	0	0	0
no	373	Female	65	60				154	70.5	29.7268	no	60	55	5.55	Positive	Positive	0	0	0	0	0	0	0	0	0	0	0	0	1
no	374	Female	53	48				160	67.9	26.5234	no	60	26	3.3	Positive	Positive	8	11	3	3	2	25	3	0.625	1	0	1	0	0
no	375	Female	51	46				152	52.2	22.5935	no	60	15	3.23	Positive	Positive	0	0	0	0	0	0	0	0.125	1	0	0	0	0
no	376	Female	59	54				155	53.8	22.3933	no	60	42	22.2	negative	Positive	2	2	1	1	2	6	1	0.75	1	1	1	0	0
no	377	Female	62	57				156	38.3	15.738	yes	60	83	20.9	Positive	Positive	0	0	0	0	0	0	0	0	0	0	0	0	0
no	378	Female	54	49				159	56.5	22.3488	no	60	22	3.11	Positive	Positive	0	0	0	0	0	0	0	0	0	0	0	0	1
no	379	Female	54	49				155	48.1	20.0208	no	60	9	3.14	Positive	Positive	0	0	0	0	0	0	0	0	0	0	0	0	1
no	380	Female	45	40				150	45.8	20.3556	no	60	27	9.88	Positive	negative	8	7	3	3	4	21	2	0.375	1	1	0	0	0
no	381	Female	49	44				156	52	21.3675	no	60	26	9.02	Positive	Positive	22	17	8	8	8	55	3	1.75	1	0	0	0	0
no	382	Female	50	45				160	52.2	20.3906	no	60	17	3.3	negative	negative	0	0	0	0	0	0	0	0	0	0	0	0	0
no	383	Female	52	47				165	64.9	23.8384	no	60	11	3.3	Positive	Positive	0	0	3	3	3	6	1	0.125	1	1	0	0	1
no	384	Female	42	37				154	55.1	23.2333	no	60	22	3.23	negative	negative	3	0	2	2	2	7	1	0.875	1	0	0	1	0
no	385	Female	25	20				154	45.5	19.1854	no	60	7	3.3	Positive	Positive	0	0	0	0	0	0	0	0	0	0	0	0	0
no	386	Female	52	47				155	49.2	20.4787	no	60	9.74	11	negative	Positive	2	2	1	1	2	6	1	0	0	0	0	0	0
no	387	Female	50	45				156	59.1	24.285	no	60	15	3.28	Positive	Positive	0	0	0	0	0	0	0	0	0	0	0	0	0
no	388	Female	32	27				168	72.2	25.5811	no	60	5	3.3	Positive	Positive	0	0	0	0	0	0	0	0	0	1	0	0	1
no	389	Female	76	71				160	69.6	27.1875	no	60	68	10.6	negative	Positive	1	1	2	2	4	6	1	0.25	1	0	0	0	0
no	390	Female	52	47				155	66.8	27.8044	no	60	24	10.4	negative	negative	4	2	5	5	2	16	2	1.125	1	0	0	0	0
no	391	Female	67	67				156	54.3	22.3126	no	60	10	0.08	Positive	negative	0	0	0	0	0	0	0	0	0	0	0	0	0
no	392	Female	58	53				154	48.6	20.4925	no	60	50	37.6	negative	Positive	1	1	2	2	4	6	1	0.25	1	1	0	0	1
no	393	Female	55	50				158	60.2	24.1147	no	60	100	3.96	Positive	Positive	21	20	8	8	5	57	3	1.625	1	0	1	0	0
no	394	Female	57	51.9167				149	35.9	16.1704	no	61	58	29.7	Positive	Positive	7	5	6	6	8	24	3	0	0	0	0	0	0
no	395	Female	53	48				154	64	26.986	no	61	36	3.28	Positive	negative	10	8	4	3	3	25	3	0.25	1	0	0	0	0
no	396	Female	48	43		2016-01-16		158	54.4	21.7914	no	61	53	44.2	Positive	Positive	9	3	6	6	6	24	3	1.75	1	0	0	0	1
no	397	Female	55	50		2016-06-13		152	57.7	24.974	no	62	20	3.3	Positive	Positive	0	0	0	0	0	0	0	0	0	0	0	0	0
no	398	Female	40	34.8333				158	50.2	20.109	no	62	14	2.98	negative	Positive	0	0	1	1	0	2	0	0	0	0	0	0	0
no	399	Female	50	45				157	70.1	28.4393	no	63	20	3.28	Positive	negative	1	1	0	0	4	2	0	0	0	0	0	0	0
no	400	Female	26	21				150	42.7	18.9778	no	64	19	7.99	negative	negative	0	0	0	0	0	0	0	0	0	0	0	0	0
no	401	Female	54	49				152	64.6	27.9605	no	64	37	7.18	negative	Positive	1	0	3	2	1	6	1	0.125	1	0	0	0	0
no	402	Female	34	28				159	48.5	19.1844	no	67	15	3.23	negative	negative	1	1	2	2	0	6	1	0	0	0	0	0	0
no	403	Female	63	57		2015-06-24		158	43.7	17.5052	no	68	8	3.3	Positive	Positive	4	3	5	5	5	17	2	0.875	1	0	0	0	1
no	404	Female	62	56.3333				158	51.2	20.5095	no	68	50	8.52	Positive	Positive	4	0	4	4	5	12	2	1	1	1	1	1	1
no	405	Female	45	39.25				156	55.7	22.8879	no	69	42	9.77	negative	Positive	21	8	4	4	4	37	3	0	0	0	0	0	0
no	406	Female	52	46		2014-12-21		159	47.5	18.7888	no	69	22	3.3	Positive	Positive	1	1	2	2	3	6	1	0	0	1	1	1	0
no	407	Female	58	52		2015-07-09		158	36.9	14.7813	no	70	56	27	Positive	Positive	6	4	5	5	5	20	2	0	0	0	0	0	0
no	408	Female	39	33		2016-01-01		159	46.7	18.4724	no	70	57	13.8	Positive	Positive	7	4	1	1	2	13	2	0	0	0	0	0	0
no	409	Female	53	47		2015-08-13		160	53.9	21.0547	no	70	30	5.91	Positive	Positive	7	7	5	5	4	24	3	1.375	1	1	1	0	0
no	410	Female	38	32		2015-05-31		163	43.3	16.2972	no	70	15	3.3	Positive	Positive	0	0	0	0	0	0	0	0	0	0	0	0	1
no	411	Female	31	25				160	50.3	19.6484	no	71	4	3.13	Positive	Positive	1	0	1	1	2	3	1	0.375	1	1	0	0	1
no	412	Female	63	57		2015-12-03		155	56.3	23.4339	no	71	19	6.27	Positive	Positive	2	0	5	5	5	12	2	0.125	1	0	0	0	0
no	413	Female	49	43		2014-07-31		153	58.5	24.9904	no	71	92	19.2	negative	negative	2	2	5	5	5	14	2	1.625	1	1	0	0	1
no	414	Female	34	28				152	53.2	23.0263	no	72	20	3.13	Positive	Positive	1	0	4	3	4	8	1	0	0	0	0	0	1
no	415	Female	47	41				148	49.8	22.7356	no	72	91	3.23	Positive	Positive	4	0	9	9	8	22	3	1.25	1	0	0	0	0
no	416	Female	29	23				162	57	21.7193	yes	72	23	8.05	Positive	Positive	2	2	7	5	4	16	2	0	0	0	0	0	1
no	417	Female	36	30				159	51.6	20.4106	no	72	80	36.3	Positive	Positive	13	12	8	8	9	41	3	1.25	1	0	0	0	0
no	418	Female	48	42				152	46.7	20.213	no	72	12	3.28	Positive	negative	9	8	5	5	5	27	3	0.25	1	0	0	0	0
no	419	Female	61	55				153	48.8	20.8467	no	72	127	43.9	negative	negative	9	9	4	4	6	26	3	1.5	1	1	0	0	1
no	420	Female	28	22				152	42.9	18.5682	no	72	76	36.4	Positive	Positive	5	7	3	3	4	18	2	0.25	1	0	0	0	1
no	421	Female	25	19				164	55.1	20.4863	no	72	16	13.6	Positive	Positive	0	0	0	0	2	0	0	0	0	0	0	0	0
no	422	Female	48	42				158	55	22.0317	no	72	77	59	negative	Positive	7	7	3	3	4	20	2	0.25	1	1	0	0	0
no	423	Female	61	55				150	34	15.1111	no	72	29	18.1	Positive	Positive	1	0	7	5	4	13	2	0.88	1	0	0	0	0
no	424	Female	32	26				154	43.8	18.4685	no	72	8	3.28	negative	negative	3	0	0	0	2	3	1	0	0	1	0	0	1
no	425	Female	62	56				155	59.4	24.7242	no	72	27	3.12	negative	negative	0	0	0	0	0	0	0	0.125	1	0	0	0	1
no	426	Female	56	50				154	47.5	20.0287	no	72	16	3.02	Positive	Positive	0	0	0	0	0	0	0	0	0	0	0	0	1
no	427	Female	37	31				152	65.6	28.3934	no	72	26	7.22	negative	negative	1	0	2	2	2	5	1	0.12	1	1	0	0	1
no	428	Female	45	39				150	38.1	16.9333	no	72	10	3.23	negative	Positive	1	0	4	4	4	9	1	1.125	1	0	0	0	0
no	429	Female	47	41				150	51.8	23.0222	no	72	13	3.23	negative	Positive	2	0	0	0	2	2	0	0	0	0	0	0	0
no	430	Female	53	47				167.005	39.3	14.0907	no	72	44	19.9	Positive	Positive	13	7	10	6	7	36	3	1.625	1	1	0	0	1
no	431	Female	45	39				157	47.3	19.1894	no	72	12	3.02	negative	Positive	0	0	2	2	2	4	1	0	0	0	0	0	0
no	432	Female	63	57				148.005	54.4	24.834	no	72	6	3.13	negative	Positive	0	0	2	2	2	4	1	0	0	0	0	0	1
no	433	Female	44	38				152	54.5	23.589	no	72	36	3.28	negative	Positive	0	0	1	1	0	2	0	0	0	0	0	0	0
no	434	Female	34	28				157	45	18.2563	no	72	13	3.28	negative	negative	3	0	1	1	1	5	1	0	0	0	0	0	0
no	435	Female	41	35				156	43.3	17.7926	no	73	53	8.71	negative	negative	0	0	2	2	1	4	1	0	0	0	0	0	0
no	436	Female	49	43		2014-01-20		150	55	24.4444	no	74	55	3.11	Positive	negative	7	2	5	5	5	19	2	0.75	1	0	0	0	0
no	437	Female	49	43		2015-05-12		152	69.8	30.2112	no	75	32	34.1	Positive	Positive	1	1	6	6	6	14	2	0.625	1	0	0	0	0
no	438	Female	57	51				150	54	24	no	75	18	10.8	negative	negative	2	2	2	2	3	8	1	0.5	1	0	0	0	0
no	439	Female	51	44.5833				156	45.8	18.8199	no	77	24	3.11	Positive	negative	1	0	2	2	2	5	1	0	0	0	0	0	0
no	440	Female	50	44				152	75.9	32.8515	no	78	27	5.03	Positive	Positive	6	0	3	2	2	11	2	0	0	0	0	0	1
no	441	Female	43	37				155	52	21.6441	no	78	44	43	Positive	Positive	3	2	0	0	2	5	1	0.125	1	0	1	1	0
no	442	Female	50	44				155	50.2	20.8949	no	78	11	3.28	Positive	Positive	4	2	4	4	4	14	2	0.88	1	0	0	0	1
yes	443	Female	59	52	45.8521	2009-01-01	2002-01-01	160	60.2	23.5156	no	79	4	3.28	Positive	Positive	1	0	3	3	2	7	1	0.25	1	0	0	0	0
no	444	Female	41	34				158	58.6	23.4738	no	79	24	6.1	negative	Positive	0	0	9	9	8	18	2	0.375	1	0	0	0	0
no	445	Female	43	36		2014-10-15		156	56.8	23.3399	no	79	8	3.13	Positive	Positive	0	0	5	4	2	9	1	0.125	1	0	0	0	0
no	446	Female	57	50				161	55	21.2183	no	80	30	5.4	Positive	Positive	2	1	5	3	6	11	2	0.125	1	1	0	0	0
no	447	Female	59	52				150	53	23.5556	no	80	41	3.23	negative	Positive	5	2	2	2	2	11	2	0.25	1	0	0	0	0
no	448	Female	61	55		2012-10-01		152.005	48.9	21.1638	no	81	15	3.02	negative	Positive	9	3	1	1	2	14	2	0	0	0	0	0	0
no	449	Female	48	41.1667				157.005	55.9	22.677	no	82	35	3.14	negative	Positive	4	2	4	2	2	12	2	0.125	1	0	0	0	0
no	450	Female	70	63		2014-01-01		148	42.6	19.4485	yes	82	121	26.1	Positive	Positive	8	7	5	4	4	24	3	1.875	1	0	0	0	0
no	451	Female	64	57				150	63.1	28.0444	no	83	5	3.28	negative	negative	0	0	2	2	2	4	1	0	0	0	0	0	0
no	452	Female	50	43		2008-04-01		152	50.2	21.7278	no	83	5	3.28	Positive	Positive	1	1	5	3	4	10	2	0.62	1	1	1	0	0
no	453	Female	52	45		2013-10-14		148	53	24.1965	no	83	32	9.46	negative	negative	12	6	5	6	5	29	3	1.25	1	0	0	0	0
no	454	Female	49	42		2014-09-19		168	62	21.9671	yes	83	35	4.6	Positive	Positive	5	8	7	7	6	27	3	0.875	1	0	0	0	1
no	455	Female	56	49				162.005	52.3	19.9271	no	84	73	53.7	negative	negative	22	8	7	6	6	43	3	1.125	1	1	1	1	0
no	456	Female	41	34				170	63.4	21.9377	no	84	30	3.28	negative	Positive	3	1	0	0	0	4	1	0	0	0	0	0	0
no	457	Female	47	40				153	46.3	19.7787	no	84	28	3.3	negative	negative	1	1	9	5	3	16	2	0.5	1	0	0	0	1
no	458	Female	61	54				135	32.3	17.7229	no	84	40	6.11	negative	Positive	17	5	5	5	5	32	3	0	0	1	0	1	0
no	459	Female	56	49				157	59.5	24.1389	no	84	112	36.5	Positive	Positive	10	10	8	8	8	36	3	2.375	1	1	0	0	1
no	460	Female	43	36				155	42.6	17.7315	no	84	35	3.13	Positive	negative	4	2	0	0	2	6	1	0.375	1	0	0	0	1
no	461	Female	51	44				160	45.2	17.6562	no	84	37	1.54	negative	Positive	0	0	3	3	2	6	1	0.12	1	0	0	0	0
no	462	Female	26	19				158	52.5	21.0303	no	84	10	3.3	negative	negative	1	0	0	0	0	1	0	0	0	0	0	0	0
no	463	Female	66	59				154	57.1	24.0766	no	84	62	31.8	negative	negative	17	11	5	4	5	37	3	0	0	0	0	0	0
no	464	Female	48	41				158	53.3	21.3507	no	84	18	19	negative	negative	12	11	4	4	1	31	3	0.75	1	1	0	0	0
no	465	Female	56	49				159	51.4	20.3315	no	84	26	3.28	negative	negative	2	0	5	3	2	10	2	0.5	1	1	1	0	0
no	466	Female	50	43				159	58.2	23.0212	no	84	57	13.6	Positive	Positive	3	5	3	3	3	14	2	0.75	1	0	1	0	0
no	467	Female	62	55				155	58.9	24.5161	no	84	20	4.69	negative	Positive	0	2	0	0	0	2	0	0.125	1	1	0	1	0
no	468	Female	49	42				155	45.4	18.897	no	84	13	3.13	negative	negative	9	9	5	5	4	28	3	0	0	0	0	0	1
no	469	Female	61	54				150	52.6	23.3778	no	84	54	5.31	Positive	Positive	2	0	2	2	2	6	1	0.375	1	0	1	0	1
no	470	Female	62	55				150	47.2	20.9778	no	84	10	3.3	Positive	negative	0	0	0	0	1	0	0	0.12	1	0	0	0	0
no	471	Female	36	29				153	39.7	16.9593	no	84	12	3.3	negative	negative	0	0	1	1	0	2	0	0	0	1	1	0	0
no	472	Female	46	39				150	54.8	24.3556	no	84	82	5.98	Positive	Positive	4	4	6	6	6	20	2	1	1	0	0	0	0
no	473	Female	51	44				155	48.1	20.0208	no	84	128	19.8	Positive	Positive	9	8	4	4	3	25	3	0.875	1	0	0	0	0
no	474	Female	37	30				155	56.5	23.5172	no	84	21	3.3	Positive	Positive	1	0	0	0	0	1	0	0	0	1	1	1	1
no	475	Female	59	52				150	43	19.1111	no	84	25	3.92	Positive	Positive	1	1	5	4	2	11	2	0.38	1	1	0	0	0
no	476	Female	61	54				155	70.9	29.5109	no	84	48	3.28	negative	Positive	3	1	3	4	2	11	2	0.75	1	0	0	0	0
no	477	Female	35	28				154	40.5	17.0771	no	84	22	3.14	Positive	Positive	20	14	2	2	2	38	3	0.125	1	0	0	0	0
no	478	Female	19	12				143	45.4	22.2016	no	86	31	30	negative	Positive	2	1	5	5	4	13	2	0.375	1	1	1	0	1
no	479	Female	60	53				153	49.6	21.1884	no	87	32	3.28	negative	negative	0	0	0	0	0	0	0	0	0	0	0	0	0
no	480	Female	39	32				156	51.7	21.2442	no	88	60	3.28	Positive	negative	7	2	6	5	3	20	2	1.5	1	1	0	0	1
no	481	Female	48	41				153	43.5	18.5826	no	88	32	6.65	Positive	Positive	0	0	0	0	0	0	0	0	0	1	0	1	0
no	482	Female	46	39				157	52	21.0962	no	88	50	37.7	Positive	Positive	6	2	5	5	5	18	2	0.25	1	0	0	0	0
no	483	Female	48	41				158	38.4	15.3822	no	89	68	74.9	Positive	Positive	8	8	8	8	7	32	3	2.5	1	1	0	0	0
no	484	Female	53	46				165	68.1	25.0138	no	89	17	3.3	Positive	Positive	5	3	4	4	4	16	2	0.625	1	0	0	0	1
no	485	Female	51	43.5833				156	75.6	31.0651	no	89	11	3.3	Positive	Positive	0	0	0	0	0	0	0	0	0	0	0	0	0
no	486	Female	48	41				155	52.8	21.9771	no	90	38	32.3	Positive	Positive	3	2	4	4	0	13	2	0.125	1	0	0	0	0
no	487	Female	53	46				160	67.7	26.4453	no	90	41	28.7	Positive	Positive	1	1	0	0	2	2	0	0	0	0	0	0	1
no	488	Female	44	37				154	41.1	17.3301	no	90	14	3.16	Positive	negative	3	3	4	4	4	14	2	0	0	0	0	0	1
no	489	Female	65	58		2013-01-14		150	41.8	18.5778	no	92	55	3.11	Positive	Positive	1	2	2	2	2	7	1	0	0	0	0	0	0
no	490	Female	37	30		2013-03-23		160	51.7	20.1953	no	92	28	3.3	Positive	Positive	7	4	6	6	4	23	3	1.625	1	0	0	0	0
no	491	Female	63	55		2013-06-25		146	48	22.5183	no	93	52	19.4	negative	negative	3	3	7	7	7	20	2	1	1	0	1	1	0
no	492	Female	51	43.1667				153	39.8	17.002	no	94	32	3.3	negative	Positive	6	0	2	2	2	10	2	0	0	0	0	0	0
no	493	Female	37	29				163	57.3	21.5665	no	95	6	3.28	negative	Positive	4	3	4	4	4	15	2	0.38	1	0	0	0	0
no	494	Female	60	52		2013-04-09		148	41	18.718	no	95	132	135	Positive	Positive	3	4	5	5	6	17	2	1.125	1	0	0	1	1
no	495	Female	52	44		2013-09-01		150	61.2	27.2	no	95	24	3.66	Positive	Positive	10	0	4	4	4	18	2	0.25	1	0	0	0	0
no	496	Female	54	47		2013-12-17		155	49.5	20.6035	no	95	20	3.28	Positive	negative	4	1	1	2	3	8	1	0	0	1	0	0	0
no	497	Female	51	43		2013-03-29		155	54.5	22.6847	no	95	27	14.7	Positive	Positive	7	4	5	5	7	21	2	0.625	1	0	0	0	1
no	498	Female	50	43		2013-08-01		160	65.8	25.7031	no	95	24	3.13	Positive	Positive	0	1	0	0	0	1	0	0	0	0	0	0	0
no	499	Female	60	52				152	53	22.9398	yes	96	125	66.6	Positive	Positive	10	7	5	5	6	27	3	1.125	1	1	0	0	0
no	500	Female	64	56				148	40.8	18.6267	no	96	41	3.61	Positive	Positive	0	0	1	1	0	2	0	0.12	1	0	0	0	0
no	501	Female	43	35				153	44.6	19.0525	no	96	18	3.23	Positive	Positive	3	0	2	2	1	7	1	0	0	1	1	0	0
no	502	Female	64	56				158	59.8	23.9545	no	96	53	3.14	negative	negative	0	0	0	0	0	0	0	0	0	0	0	0	1
no	503	Female	44	36				148	44.2	20.179	no	96	22	3.02	Positive	Positive	3	3	6	5	3	17	2	0.5	1	0	0	0	0
no	504	Female	58	50				142	33.8	16.7625	no	96	21	3.13	Positive	Positive	1	1	1	1	2	4	1	0	0	0	0	0	0
no	505	Female	34	26				160	54.3	21.2109	no	96	44	3.02	negative	negative	3	1	1	1	2	6	1	0	0	0	0	0	0
no	506	Female	66	58				150	38.1	16.9333	no	96	77	37.9	negative	negative	3	2	4	4	4	13	2	0.5	1	0	0	0	0
no	507	Female	53	45				158	52.3	20.9502	no	96	71	6.5	negative	Positive	3	1	6	6	6	16	2	0.875	1	0	0	0	1
no	508	Female	62	54				156	65.5	26.9149	no	96	9	3.11	Positive	Positive	14	6	5	5	4	30	3	1	1	0	0	0	0
no	509	Female	51	43				160	49.3	19.2578	no	96	21	2.75	Positive	Positive	9	4	1	1	2	15	2	0.38	1	0	0	0	0
no	510	Female	51	43		2012-12-01		155	56.1	23.3507	no	96	65	16.8	Positive	Positive	4	1	3	2	2	10	2	0.375	1	0	0	0	0
no	511	Female	52	44				158	64.5	25.8372	no	96	45	7.06	negative	Positive	14	13	5	5	4	37	3	1	1	0	0	0	0
no	512	Female	31	23				147	49.7	22.9997	no	96	127	67.9	negative	negative	27	7	6	6	5	46	3	1.75	1	0	1	0	0
no	513	Female	54	46				157	56.9	23.0841	no	96	34	8.35	negative	Positive	0	0	0	0	0	0	0	0	0	1	0	0	0
no	514	Female	67	59				160	68.5	26.7578	no	96	67	76.3	Positive	Positive	6	3	4	4	2	17	2	0.25	1	0	0	0	0
no	515	Female	65	57				155	59	24.5578	no	96	12	3.3	negative	negative	4	0	2	2	2	8	1	0.375	1	0	0	0	0
no	516	Female	69	61				150	53.7	23.8667	no	96	15	3.28	Positive	Positive	0	2	0	0	2	2	0	0	0	0	0	0	0
no	517	Female	65	57		2012-11-01		160	53.4	20.8594	no	97	42	15.7	Positive	Positive	14	8	4	3	2	29	3	1	1	0	0	0	0
no	518	Female	47	39				155	52	21.6441	no	97	53	22.1	Positive	Positive	11	4	2	2	2	19	2	0.25	1	0	0	0	0
no	519	Female	64	55.8333				145	51.9	24.6849	no	98	47	13.7	negative	Positive	2	0	2	2	2	6	1	0.125	1	1	1	0	0
no	520	Female	50	42				159	52.4	20.727	no	100	31	12.1	Positive	Positive	7	6	8	8	6	29	3	0.88	1	0	0	0	0
no	521	Female	44	35.5833				160	50.3	19.6484	no	101	7	3.11	negative	negative	3	1	8	8	5	20	2	0.375	1	1	1	0	0
no	522	Female	50	41		2012-04-11		160	74.7	29.1797	no	101	30	9.74	Positive	Positive	18	9	3	3	2	33	3	0.75	1	1	0	0	1
no	523	Female	60	51.5833				155	58.5	24.3496	no	101	40	3.14	Positive	Positive	0	5	2	2	2	9	1	0.25	1	0	0	0	0
no	524	Female	58	50				155	52.9	22.0187	no	102	11	3.28	negative	Positive	1	0	5	5	4	11	2	0.75	1	0	0	0	0
no	525	Female	48	39		2013-01-01		160	41.6	16.25	no	102	18	3.13	Positive	Positive	19	2	5	6	5	32	3	1	1	0	1	0	0
no	526	Female	34	25		2012-08-23		158	50.7	20.3092	no	102	71	10.7	Positive	Positive	9	7	10	10	10	36	3	2.125	1	0	1	0	0
no	527	Female	58	50				160	59.5	23.2422	no	102	39	33.9	negative	negative	7	0	7	7	4	21	2	1.125	1	0	0	0	0
no	528	Female	42	33.4167				153	38.4	16.4039	no	103	80	42.5	Positive	Positive	4	5	5	5	3	19	2	0.5	1	0	0	0	0
no	529	Female	26	17.4167				174.005	48.9	16.1505	no	103	31	8.06	negative	Positive	3	2	6	6	4	17	2	0.5	1	0	0	0	0
no	530	Female	72	64		2013-04-09		151	55.5	24.341	no	103	74	6.48	Positive	Positive	1	0	5	2	4	8	1	0	0	1	0	0	0
no	531	Female	40	31				147	41.9	19.3901	no	105	2	0.16	negative	negative	2	1	1	1	2	5	1	0	0	0	0	0	0
no	532	Female	31	22		2011-10-12		166	60	21.7738	no	106	81	53.2	negative	negative	2	2	3	3	2	10	2	0.5	1	0	0	0	0
no	533	Female	25	16		2013-01-01		168	63.6	22.534	no	107	11.8	10.5	negative	negative	10	8	5	5	3	28	3	0.25	1	0	0	0	0
no	534	Female	54	45		2012-01-03		160	51.5	20.1172	no	107	52	14.2	Positive	Positive	10	11	2	1	2	24	3	0	0	1	0	0	0
no	535	Female	67	58				160	48.1	18.7891	no	108	27	4.58	Positive	Positive	1	1	5	3	3	10	2	0.25	1	0	0	0	0
no	536	Female	25	16				145	46.4	22.069	no	108	21	3.8	negative	negative	2	2	5	5	3	14	2	0.62	1	1	0	0	0
yes	537	Female	46	37	50.3151	2008-09-12	2021-11-13	154	55.7	23.4863	no	108	9	3.02	Positive	Positive	0	0	0	0	0	0	0	0	0	0	0	0	1
no	538	Female	51	42				152	60.8	26.3158	no	108	22	3.28	negative	negative	0	0	2	2	2	4	1	0.25	1	0	0	0	0
no	539	Female	24	15				158	58.3	23.3536	no	108	30	4.75	Positive	Positive	1	0	0	0	1	1	0	0	0	1	1	0	0
no	540	Female	36	27		2012-01-01		165	59.2	21.7447	no	108	50	3.13	Positive	Positive	12	7	10	6	8	35	3	1	1	1	0	0	0
no	541	Female	51	42				160	52.6	20.5469	no	108	15	4.62	Positive	Positive	0	0	0	0	2	0	0	0	0	0	0	0	0
no	542	Female	47	38				155	51	21.2279	no	108	10	3.14	negative	Positive	2	2	0	0	2	4	1	0	0	0	0	0	0
no	543	Female	58	49				157	40.7	16.5118	no	108	70	24.3	Positive	Positive	0	0	3	3	2	6	1	0.38	1	0	1	0	0
no	544	Female	46	37				150	40.2	17.8667	no	108	53	3.13	Positive	Positive	0	0	0	0	0	0	0	0	0	1	0	0	0
no	545	Female	33	24				158	43.5	17.4251	no	109	6	3.11	Positive	Positive	4	1	3	2	3	10	2	0.625	1	0	0	1	0
no	546	Female	49	39.8333				148	63.3	28.8988	no	110	32	4.37	Positive	Positive	2	0	0	0	2	2	0	0	0	0	0	0	0
no	547	Female	54	44		2011-04-12		153	59.1	25.2467	no	111	12	3.11	negative	negative	4	4	4	4	2	16	2	1.375	1	0	0	0	0
no	548	Female	44	35				152	42.4	18.3518	no	112	166	8.72	Positive	Positive	4	0	5	5	2	14	2	0.25	1	0	0	0	0
no	549	Female	60	51				158	53.9	21.5911	no	113	60	10.6	Positive	Positive	2	1	3	3	3	9	1	0.125	1	0	0	0	1
no	550	Female	39	29.5833				168	60.8	21.542	no	113	26	8.04	negative	Positive	0	0	0	0	0	0	0	0	0	0	0	0	0
no	551	Female	45	36				163	65	24.4646	no	114	26	3.14	Positive	negative	0	0	0	0	0	0	0	0	0	0	0	0	0
no	552	Female	48	39				152	59.4	25.7098	no	114	18	25.8	Positive	Positive	2	1	3	3	2	9	1	0	0	1	0	0	0
no	553	Female	56	46.4167				163	70.9	26.6852	no	115	33	3.14	negative	Positive	0	0	2	1	0	3	1	0	0	0	0	1	1
no	554	Female	56	47		2012-02-01		145	38.7	18.4067	no	116	57	12.9	Positive	Positive	9	4	7	6	3	26	3	1.625	1	1	0	0	0
no	555	Female	36	26				153	46.7	19.9496	no	116	79	22.2	Positive	Positive	0	0	1	1	2	2	0	0	0	0	1	0	1
no	556	Female	56	46		2011-06-25		165	62.8	23.067	no	117	107	56.8	Positive	negative	11	9	8	8	8	36	3	1.875	1	1	0	0	1
no	557	Female	38	28		2011-10-01		157	49.9	20.2442	no	118	46	41.4	negative	negative	2	0	4	4	4	10	2	0.375	1	1	1	1	1
no	558	Female	31	21.0833				157	47.8	19.3923	no	119	10	28.7	negative	Positive	3	3	6	6	5	18	2	0.125	1	1	0	1	0
no	559	Female	73	63		2011-04-25		160	55.8	21.7969	yes	119	82	3.13	negative	Positive	3	2	6	4	3	15	2	0.625	1	0	0	0	0
no	560	Female	49	39		2011-03-23		160	52.3	20.4297	no	119	33	6.58	negative	Positive	2	2	1	0	2	5	1	0	0	1	0	1	0
no	561	Female	59	49		2010-08-13		158	54	21.6311	no	119	80	26.2	Positive	Positive	5	9	4	4	3	22	3	1.875	1	0	0	0	0
no	562	Female	53	43				143	45.8	22.3972	no	120	12	3.11	Positive	Positive	8	3	5	5	4	21	2	1.625	1	0	0	0	0
no	563	Female	51	41				165	59	21.6713	no	120	21	0.35	Positive	Positive	0	0	1	1	2	2	0	0.12	1	0	0	0	1
no	564	Female	56	46				155	47.3	19.6878	no	120	32	9	Positive	Positive	1	1	4	4	6	10	2	0.625	1	0	0	0	0
no	565	Female	55	45				162	65.5	24.9581	no	120	27	3.23	Positive	negative	1	1	5	5	3	12	2	0.25	1	0	0	1	1
no	566	Female	26	16				158	54.5	21.8314	no	120	60	45.9	negative	Positive	0	1	0	0	0	1	0	0	0	0	0	0	0
no	567	Female	32	22				166	64	23.2254	no	120	30	3.28	negative	negative	1	1	3	3	4	8	1	0	0	0	0	0	0
no	568	Female	74	64				157	41.5	16.8364	no	120	56	6.46	Positive	negative	2	0	4	4	2	10	2	0.5	1	0	0	0	1
no	569	Female	63	53				155	47.1	19.6046	no	120	32	6.91	Positive	Positive	2	0	5	4	2	11	2	0.12	1	1	1	0	1
no	570	Female	61	51				150	51.3	22.8	no	120	18	0.5	Positive	Positive	0	0	2	2	2	4	1	0.38	1	0	0	0	0
no	571	Female	55	45				162	61.4	23.3958	no	120	56	3.3	Positive	Positive	0	0	0	0	2	0	0	0	0	0	1	0	0
no	572	Female	44	34				160	52.6	20.5469	no	120	28	3.3	negative	negative	0	0	3	3	4	6	1	0.5	1	0	0	0	0
no	573	Female	55	45				157	46	18.662	no	120	140	123	Positive	Positive	21	12	5	5	2	43	3	0.625	1	0	0	1	0
no	574	Female	62	52				156	50.4	20.7101	no	120	88	20.5	Positive	Positive	7	3	2	2	2	14	2	0.12	1	1	1	1	0
no	575	Female	61	51				160	46.7	18.2422	no	120	135	65.1	negative	negative	6	2	8	8	7	24	3	2.375	1	0	0	0	1
no	576	Female	52	42				155	61.3	25.5151	no	120	47	3.3	Positive	Positive	0	0	0	0	0	0	0	0	0	1	0	0	0
no	577	Female	48	38				148	58.8	26.8444	no	120	63	19.8	Positive	Positive	13	7	5	5	4	30	3	1.5	1	1	1	0	1
no	578	Female	63	53				152	51.1	22.1174	no	120	45	61.1	Positive	Positive	7	7	8	8	8	30	3	2.125	1	0	0	0	0
no	579	Female	57	47				159	56.1	22.1906	no	120	29	3.23	Positive	Positive	0	0	0	0	0	0	0	0.125	1	0	0	0	0
no	580	Female	53	43				158	51.4	20.5896	no	120	39	11.8	Positive	Positive	4	1	3	3	2	11	2	0.25	1	0	0	0	0
no	581	Female	57	47				160	66.6	26.0156	no	120	11	3.12	negative	negative	1	0	2	2	2	5	1	0.5	1	0	0	0	0
no	582	Female	26	16				152	39.6	17.1399	no	120	105	53.7	Positive	Positive	2	0	7	5	4	14	2	0.5	1	0	0	0	0
no	583	Female	27	17				162	51.2	19.5092	no	120	7	3.28	Positive	Positive	3	0	2	2	2	7	1	0	0	1	0	0	0
no	584	Female	42	32				152	52.1	22.5502	no	120	11	3.28	Positive	Positive	0	0	0	0	0	0	0	0	0	0	0	0	1
no	585	Female	47	37				149	43.1	19.4135	no	120	17	3.14	negative	Positive	0	0	0	0	0	0	0	0	0	0	0	1	0
no	586	Female	44	34				165	43.5	15.978	no	120	28	2.26	Positive	Positive	5	0	5	5	2	15	2	0.62	1	1	1	0	0
no	587	Female	67	57				158	58.3	23.3536	no	120	18	3.23	negative	negative	2	0	5	5	2	12	2	0	0	0	0	0	0
no	588	Female	62	52				160	53.4	20.8594	no	120	16	3.3	negative	Positive	0	0	0	0	2	0	0	0	0	1	1	0	0
no	589	Female	55	45				156	53.2	21.8606	no	120	3	3.3	negative	Positive	0	0	1	1	3	2	0	0.12	1	0	0	0	1
yes	590	Female	52	42	46.9397	2006-01-27	2010-01-01	158	63.3	25.3565	no	120	9	3.3	Positive	Positive	0	0	0	0	0	0	0	0	0	0	0	0	0
no	591	Female	25	15				165	47.3	17.3737	no	120	23	3.84	Positive	Positive	4	0	10	7	3	21	2	1	1	0	0	0	0
no	592	Female	79	69				147	42.6	19.714	no	120	80	24.5	Positive	Positive	0	0	4	3	3	7	1	0.375	1	0	0	0	0
no	593	Female	49	39				164	63.9	23.7582	no	120	3	3.16	negative	negative	0	0	3	3	4	6	1	0.25	1	0	0	0	0
no	594	Female	61	51				158	70	28.0404	no	120	45	5.03	negative	negative	0	0	0	0	0	0	0	0.125	1	1	0	0	0
no	595	Female	48	38				152	55.1	23.8487	no	120	98	62.7	Positive	Positive	10	2	6	6	6	24	3	1.625	1	0	0	0	0
no	596	Female	51	41				150	44.8	19.9111	no	120	20	3.13	Positive	Positive	0	1	2	2	2	5	1	0.5	1	1	1	0	0
no	597	Female	62	52				157	54.8	22.2321	no	121	48	4.71	Positive	Positive	6	6	6	6	6	24	3	1.25	1	0	0	0	0
no	598	Female	20	10				155	46.7	19.4381	no	121	10	5.66	Positive	Positive	3	1	3	3	2	10	2	0.125	1	1	0	0	0
no	599	Female	47	37				159	59.2	23.4168	no	121	7	0.27	negative	Positive	1	0	1	1	1	3	1	0.12	1	1	0	0	0
no	600	Female	42	32				159	56.5	22.3488	no	122	33	3.28	Positive	Positive	3	0	3	2	2	8	1	0.62	1	0	0	0	0
no	601	Female	57	47		2011-08-10		158	70.7	28.3208	no	123	13	3.3	negative	negative	0	0	0	0	0	0	0	0	0	0	0	0	0
no	602	Female	68	58				160	45.5	17.7734	no	125	122	89.2	Positive	Positive	4	4	9	8	3	25	3	2.25	1	0	0	0	0
no	603	Female	65	54.5				146.005	52.9	24.8153	no	126	9	4.6	negative	negative	3	2	8	8	7	21	2	1.5	1	1	1	0	0
no	604	Female	50	39.5				158.005	65.9	26.3963	yes	126	31	4.35	Positive	Positive	21	18	5	5	5	49	3	2.25	1	1	0	0	1
no	605	Female	49	38				164	52.8	19.6312	no	127	50	8.4	negative	Positive	1	0	4	4	4	9	1	0.25	1	0	0	0	0
no	606	Female	61	51		2010-04-06		157	49.9	20.2442	no	127	125	184	Positive	Positive	15	13	8	8	6	44	3	1	1	0	0	0	0
no	607	Female	53	42.4167				157.005	61.2	24.827	no	127	9	3.14	Positive	Positive	0	0	0	0	0	0	0	0	0	1	0	0	1
no	608	Female	54	43		2011-01-01		153	60.7	25.9302	no	127	17	3.13	Positive	Positive	1	0	6	4	5	11	2	0	0	0	0	0	0
no	609	Female	64	53				168	57.3	20.3019	no	128	135	35.6	Positive	Positive	4	4	2	4	4	14	2	1.125	1	0	0	0	0
no	610	Female	70	59				155	58.2	24.2248	no	128	115	45.5	negative	negative	1	0	0	0	0	1	0	0	0	0	1	0	1
no	611	Female	57	46.3333				150	50.5	22.4444	no	128	68	13.9	Positive	Positive	7	8	4	3	2	22	3	0.625	1	1	1	1	1
no	612	Female	27	16				159	43.7	17.2857	no	129	20	27.7	Positive	Positive	1	1	3	3	2	8	1	0.375	1	0	0	0	0
no	613	Female	49	39				155	48	19.9792	no	129	29	9.81	negative	Positive	12	6	8	8	4	34	3	1.625	1	0	0	0	0
no	614	Female	44	33		2010-06-25		164	69.3	25.7659	no	130	145	114	Positive	Positive	22	16	10	10	9	58	3	2.75	1	0	0	0	0
no	615	Female	62	51				155	46.6	19.3965	no	132	22	3.23	negative	Positive	0	0	0	0	0	0	0	0.125	1	1	0	1	0
no	616	Female	54	43				164	61.7	22.9402	no	132	89	23	Positive	Positive	16	2	9	9	6	36	3	1	1	0	0	0	0
no	617	Female	33	22				158	53.8	21.551	no	132	17	3.47	negative	negative	2	2	2	2	3	8	1	0.125	1	1	0	0	1
no	618	Female	51	40				146	43.2	20.2665	no	132	68	72.7	Positive	negative	7	1	4	4	2	16	2	0.5	1	0	0	0	1
no	619	Female	54	43				145	39	18.5493	no	132	11	5.58	negative	Positive	5	11	4	4	4	24	3	0.875	1	1	1	0	1
no	620	Female	67	56				150	49.2	21.8667	no	132	68	3.13	Positive	Positive	1	1	0	0	1	2	0	0	0	0	0	0	0
no	621	Female	57	46				162	66.2	25.2248	no	132	96	38.8	Positive	Positive	9	10	6	6	4	31	3	0.88	1	0	0	0	0
no	622	Female	62	51				153	39.2	16.7457	no	132	8	3.11	negative	negative	7	4	5	5	4	21	2	2.5	1	0	0	0	0
no	623	Female	40	29				156	69.5	28.5585	no	132	34	5.09	Positive	Positive	0	0	0	0	0	0	0	0	0	0	0	0	1
no	624	Female	39	28				158	50.4	20.1891	no	132	35	3.16	Positive	Positive	1	1	2	2	2	6	1	0	0	0	0	0	0
no	625	Female	43	32				164	60.8	22.6056	no	132	47	35.5	Positive	Positive	4	4	7	7	6	22	3	0.625	1	0	1	0	0
no	626	Female	68	57		2010-06-17		133	35.4	20.0124	no	134	6	3.2	negative	negative	0	0	3	3	5	6	1	0.125	1	1	0	1	0
no	627	Female	29	17.8333				156	53.5	21.9839	no	134	9	3.3	Positive	Positive	3	1	1	1	2	6	1	0.125	1	1	0	0	0
no	628	Female	52	40		2010-01-01		157.5	56.6	22.8168	no	138	5	3.13	Positive	Positive	0	0	0	0	0	0	0	0	0	1	0	0	1
no	629	Female	59	48		2010-01-01		159	64.2	25.3946	no	138	48	3.13	negative	Positive	0	0	3	2	0	5	1	0	0	0	0	0	1
no	630	Female	37	25.5				171	66.5	22.742	no	138	8	3.11	Positive	Positive	1	0	1	1	1	3	1	0	0	0	0	0	0
no	631	Female	73	61		2010-01-01		155	57.2	23.8085	no	139	72	3.77	Positive	Positive	13	13	7	7	7	40	3	1.875	1	0	0	0	0
no	632	Female	54	43		2010-01-01		163	60.3	22.6956	no	139	27	3.13	Positive	Positive	1	1	2	2	2	6	1	0.125	1	0	0	0	0
no	633	Female	48	36.3333				156	55.6	22.8468	no	140	6	3.14	Positive	Positive	0	0	1	1	1	2	0	0	0	1	1	1	1
no	634	Female	35	23		2009-07-22		160	56.7	22.1484	no	140	63	8.78	Positive	Positive	4	3	3	4	5	14	2	0.125	1	1	0	0	1
no	635	Female	52	40		2009-12-17		160	56.1	21.9141	no	141	82	14.5	Positive	Positive	3	2	6	6	4	17	2	2.375	1	0	0	0	0
no	636	Female	67	55		2009-05-05		157	52	21.0962	no	142	30	3.55	negative	negative	6	0	3	2	1	11	2	0	0	1	0	0	1
no	637	Female	60	48				161	67.7	26.1178	no	144	24	3.3	Positive	negative	3	2	2	2	2	9	1	0.25	1	1	1	0	0
no	638	Female	67	55				150	54.6	24.2667	no	144	80	16.7	negative	Positive	4	4	8	8	3	24	3	1.625	1	0	0	0	0
no	639	Female	56	44				140	36.6	18.6735	no	144	36	3.11	Positive	Positive	5	6	9	9	8	29	3	3	1	0	0	0	0
no	640	Female	77	65				165	54.1	19.8714	no	144	94	5.28	Positive	Positive	0	0	0	0	0	0	0	0	0	0	0	0	1
no	641	Female	53	41				153	50.9	21.7438	no	144	3	4.09	negative	Positive	0	0	2	2	4	4	1	0.25	1	0	0	0	0
no	642	Female	63	51				161	52.6	20.2924	no	144	40	3.3	Positive	Positive	2	2	2	2	2	8	1	0.25	1	0	0	0	0
no	643	Female	52	40				160	56.6	22.1094	no	144	32	3.28	Positive	Positive	0	0	2	2	4	4	1	0	0	0	0	0	0
no	644	Female	53	41				156	48.2	19.806	no	144	64	6.24	Positive	Positive	20	20	8	8	6	56	3	1.38	1	0	0	0	0
no	645	Female	53	41				158	53.4	21.3908	no	144	19	3.23	Positive	Positive	0	0	1	1	1	2	0	0	0	0	0	0	0
no	646	Female	34	22				157	48.6	19.7168	no	144	18	3.3	Positive	Positive	0	0	0	0	0	0	0	0	0	0	0	0	0
no	647	Female	52	40				159	57.4	22.7048	no	144	90	37.1	Positive	Positive	10	2	7	7	8	26	3	2.125	1	0	0	0	1
no	648	Female	40	28				157	35.9	14.5645	no	144	9	5.54	negative	negative	6	10	6	6	4	28	3	1.875	1	1	0	0	1
no	649	Female	74	62				154	51.3	21.631	no	144	16	3.28	Positive	Positive	2	1	6	5	4	14	2	0.75	1	0	0	0	0
no	650	Female	46	34				170	58.6	20.2768	no	144	13	3.12	Positive	Positive	4	5	5	5	3	19	2	0.25	1	1	0	0	0
no	651	Female	52	39.6667				153	50.5	21.5729	no	148	55	13.9	Positive	Positive	0	0	1	1	1	2	0	0	0	0	0	0	0
no	652	Female	45	33				154	56.4	23.7814	no	149	36	6	Positive	Positive	6	4	2	2	3	14	2	0.5	1	0	0	0	0
no	653	Female	48	36				158	63.1	25.2764	no	150	14	3.16	Positive	negative	2	2	4	4	2	12	2	0	0	0	0	0	0
no	654	Female	47	34		2009-01-01		150	51.2	22.7556	no	151	24	32.4	Positive	Positive	3	0	5	4	5	12	2	0.75	1	0	0	0	1
no	655	Female	29	16		2008-07-08		159	58.5	23.1399	no	154	8	3.3	negative	Positive	1	1	4	4	3	10	2	0.375	1	0	0	0	0
no	656	Female	60	47		2008-07-21		158.5	69.1	27.5055	no	154	50	7.42	negative	Positive	9	4	7	7	5	27	3	1.125	1	0	0	0	0
no	657	Female	40	27		2007-08-06		159	61.1	24.1683	no	155	6	3.11	Positive	Positive	2	0	4	3	4	9	1	0	0	0	0	0	0
no	658	Female	67	54		2008-01-30		168	81.6	28.9116	no	155	40	10.2	Positive	Positive	10	10	3	2	2	25	3	0.75	1	0	0	0	0
no	659	Female	38	25				158	65.3	26.1577	yes	155	22	19.7	Positive	Positive	9	3	6	5	4	23	3	0.88	1	0	0	0	0
no	660	Female	69	56				142	44.2	21.9203	no	156	16	3.23	Positive	Positive	14	10	6	7	7	37	3	1.375	1	0	0	0	0
no	661	Female	48	35				152	65	28.1337	no	156	18	3.28	negative	negative	0	0	0	0	0	0	0	0	0	1	1	0	0
no	662	Female	50	37				155	66	27.4714	yes	156	45	19.5	Positive	Positive	12	11	9	9	8	41	3	2.875	1	0	0	0	0
no	663	Female	62	49				160	65.8	25.7031	no	156	40	20	Positive	negative	3	0	3	3	2	9	1	0.38	1	0	0	0	0
no	664	Female	50	37				161	54.6	21.064	no	156	75	56.4	Positive	Positive	6	4	5	5	4	20	2	0.62	1	1	0	0	0
no	665	Female	54	41				161	45.7	17.6305	no	156	28	3.28	Positive	Positive	2	0	3	3	2	8	1	0.75	1	1	0	0	1
no	666	Female	39	26				153	52.6	22.47	no	159	122	3.28	negative	negative	0	0	0	0	0	0	0	0	0	1	0	0	0
no	667	Female	66	52				155	45.2	18.8137	no	164	107	25.2	Positive	Positive	16	13	9	9	8	47	3	2.5	1	0	0	0	0
no	668	Female	59	45		2008-01-01		153	41.9	17.8991	no	167	103	56.1	Positive	negative	9	7	5	6	4	27	3	0	0	0	0	0	0
no	669	Female	38	24		2007-12-17		160	53.8	21.0156	no	167	135	114	Positive	Positive	28	24	10	10	10	72	3	2.5	1	1	1	0	1
no	670	Female	57	43				154	64.1	27.0282	no	168	39	13.8	negative	negative	23	22	8	8	8	61	3	2.5	1	1	0	0	1
yes	671	Female	45	31	47.6904	2005-02-15	2021-06-02	155	49.2	20.4787	no	168	27	27.2	Positive	negative	0	0	0	0	0	0	0	0	0	0	0	0	0
no	672	Female	49	35				150	46.4	20.6222	no	168	88	77.7	Positive	Positive	17	16	8	8	8	49	3	1.875	1	0	0	0	0
no	673	Female	42	28				155	52.1	21.6857	no	168	55	12.9	Positive	Positive	9	6	7	7	6	29	3	0.88	1	0	0	0	1
no	674	Female	76	62				138	47.3	24.8372	no	168	116	71.7	Positive	Positive	4	4	7	6	3	21	2	0.625	1	0	1	0	0
no	675	Female	48	33.3333				158	34.1	13.6597	no	176	18	20.7	Positive	Positive	2	2	3	3	3	10	2	0.375	1	0	0	0	1
no	676	Female	52	37				155	44.6	18.564	no	176	43	12.5	Positive	negative	12	9	6	6	6	33	3	1.5	1	0	0	0	0
no	677	Female	35	20.1667				161	62.5	24.1117	no	178	24	10.6	negative	Positive	11	8	6	6	6	31	3	2	1	0	0	0	0
no	678	Female	62	47		2006-08-11		159	58.3	23.0608	no	179	35	3.13	Positive	Positive	4	0	5	3	3	12	2	0.375	1	0	1	0	0
no	679	Female	59	44				145	44.3	21.0702	no	180	30	4.24	Positive	Positive	0	0	2	2	0	4	1	0.75	1	0	1	0	1
no	680	Female	68	53				161	53.3	20.5625	no	180	36	3.28	Positive	Positive	0	0	0	0	0	0	0	0	0	0	0	0	0
no	681	Female	45	30				158	69.7	27.9202	no	180	108	13.6	Positive	Positive	5	5	2	2	2	14	2	0.12	1	1	0	1	0
no	682	Female	53	38				155	51	21.2279	no	180	102	30.9	Positive	Positive	9	8	8	8	4	33	3	1.75	1	1	0	0	0
no	683	Female	25	10				163	46.6	17.5392	no	180	9	0.53	Positive	Positive	2	2	4	4	3	12	2	0.125	1	0	0	0	1
no	684	Female	62	47				164	55.8	20.7466	no	180	37	5.41	Positive	negative	0	1	4	4	4	9	1	0.25	1	0	1	1	0
no	685	Female	49	34				156	51.7	21.2442	no	180	51	12.2	Positive	negative	2	2	3	5	6	12	2	1.375	1	0	0	0	0
no	686	Female	53	38				155	49.5	20.6035	no	180	43	3.28	Positive	Positive	0	0	0	0	0	0	0	0	0	0	0	0	0
no	687	Female	69	54				146	35.9	16.8418	no	180	76	19.1	Positive	Positive	22	11	4	4	4	41	3	1.25	1	0	0	0	0
no	688	Female	60	45		2005-05-23		158	36.9	14.7813	no	182	127	56.2	Positive	Positive	18	16	5	5	6	44	3	2.625	1	0	0	0	0
no	689	Female	47	31.5				158	49.4	19.7885	no	186	4	3.13	negative	negative	3	2	2	2	2	9	1	0	0	0	0	0	0
no	690	Female	41	25		2004-11-11		163	50	18.8189	yes	191	23	3.3	negative	negative	0	0	0	0	0	0	0	0	0	0	0	0	0
no	691	Female	52	36				153.005	45.6	19.4784	no	192	70	33.2	Positive	Positive	2	2	3	5	6	12	2	1.75	1	0	0	0	0
yes	692	Female	57	41	51.4438	2003-07-25	2014-01-01	163.005	53.5	20.135	no	192	14	0.06	Positive	Positive	5	2	1	1	2	9	1	0.25	1	0	0	0	0
no	693	Female	64	48				150	60.7	26.9778	no	192	34	3.02	negative	negative	21	16	8	8	5	53	3	2.375	1	0	0	0	0
no	694	Female	28	12				152	48.7	21.0786	no	192	25	3.23	negative	Positive	0	1	2	2	0	5	1	0.125	1	0	0	0	1
no	695	Female	28	12				153	43.3	18.4972	no	192	16	3.16	negative	Positive	1	0	4	4	2	9	1	0.5	1	1	0	0	0
no	696	Female	54	37		2005-01-01		159	51.8	20.4897	no	194	6	6.46	Positive	negative	8	6	4	3	3	21	2	0.125	1	1	0	0	0
no	697	Female	37	21				155	43.6	18.1478	no	195	7	3.02	negative	Positive	5	4	5	4	1	18	2	0	0	0	0	0	0
no	698	Female	35	19				161	48.4	18.6721	no	198	9	3.28	negative	Positive	0	0	0	0	0	0	0	0	0	0	0	0	0
no	699	Female	55	38				156.005	52.6	21.6127	no	200	47	11.6	Positive	Positive	0	0	1	1	1	2	0	0	0	0	0	0	1
no	700	Female	44	27		2005-01-01		155	51.9	21.6025	no	200	12	3.13	Positive	Positive	16	13	8	9	8	46	3	2.625	1	0	0	0	0
no	701	Female	62	45.1667				154	58.3	24.5826	no	202	82	2.98	Positive	negative	0	0	1	1	0	2	0	0	0	0	0	0	0
no	702	Female	57	40		2003-05-21		150	63.9	28.4	no	203	123	32.1	Positive	negative	16	10	6	6	5	38	3	2	1	0	0	0	0
no	703	Female	62	45				150	49.4	21.9556	no	203	20	3.13	Positive	negative	0	0	3	3	4	6	1	0.75	1	0	0	0	1
no	704	Female	58	41				165	60.1	22.0753	no	203	25	5.98	Positive	Positive	2	2	0	0	1	4	1	0	0	1	0	0	1
no	705	Female	63	46				156	55.1	22.6414	no	204	35	4.75	Positive	negative	2	0	5	5	4	12	2	1	1	0	0	0	0
no	706	Female	37	20				153	42.8	18.2836	no	204	116	23.5	Positive	Positive	6	6	10	8	9	30	3	1.25	1	1	0	0	0
no	707	Female	77	59		2002-01-01		153.005	67	28.6196	no	214	50	3.66	Positive	Positive	2	1	4	3	4	10	2	0.5	1	0	0	0	0
no	708	Female	55	37		2003-03-29		156	49.5	20.3402	no	215	41	8.7	negative	Positive	18	8	5	5	4	36	3	1.375	1	0	0	0	0
no	709	Female	40	22				161	49.7	19.1736	no	216	10	3.3	negative	negative	3	3	3	3	2	12	2	0	0	0	0	0	0
no	710	Female	64	46		2003-02-01		157	56.7	23.003	no	216	107	47.8	Positive	Positive	6	4	4	4	4	18	2	1	1	0	0	0	0
no	711	Female	51	33				160	66.3	25.8984	no	216	17	24.4	negative	negative	10	3	7	7	6	27	3	0.625	1	0	0	0	1
no	712	Female	55	37				150	56	24.8889	no	216	36	3.51	Positive	Positive	4	2	0	0	2	6	1	0	0	0	1	0	0
no	713	Female	49	31				163	78.5	29.5457	no	216	20	4.98	Positive	Positive	18	14	4	4	4	40	3	1.375	1	0	0	0	0
no	714	Female	38	19				156	45.8	18.8199	no	229	7	3.11	negative	negative	22	3	10	9	2	44	3	1.75	1	1	0	0	1
no	715	Female	35	15.9167				151.005	35.8	15.7	no	229	16	3.14	negative	Positive	13	6	2	3	2	24	3	0.875	1	0	1	0	1
no	716	Female	70	51		2001-03-11		155	43.4	18.0645	no	235	45	18.7	Positive	negative	3	13	4	3	1	23	3	1.375	1	0	0	1	0
no	717	Female	48	28.3333				165	55.4	20.3489	no	236	49	3.3	Positive	Positive	0	0	1	1	1	2	0	0	0	0	1	0	0
no	718	Female	49	29.3333				152	58.9	25.4934	no	236	22	20.2	Positive	Positive	1	1	2	3	3	7	1	0.5	1	1	0	1	0
no	719	Female	57	37		2001-01-30		164	61.8	22.9774	no	238	11	3.3	negative	negative	0	0	2	1	0	3	1	0.375	1	0	0	0	0
no	720	Female	59	39		2001-03-29		161	49.9	19.2508	no	239	8	3.13	Positive	Positive	0	0	0	0	0	0	0	0	0	1	0	0	0
no	721	Female	51	31		2001-09-12		159	56.5	22.3488	no	239	108	12.3	Positive	Positive	2	2	4	4	2	12	2	0.375	1	1	1	1	1
no	722	Female	57	37		2001-02-23		144	38.2	18.4221	no	239	63	3.3	Positive	Positive	18	5	7	7	6	37	3	1.75	1	0	0	0	0
no	723	Female	60	40		2000-10-12		156	48.2	19.806	no	239	28	2.98	Positive	Positive	0	0	0	0	0	0	0	0	0	1	0	0	1
no	724	Female	71	51				147	45.9	21.2411	yes	240	47	87.4	Positive	Positive	21	5	8	8	7	42	3	2.5	1	1	0	0	0
no	725	Female	66	46				160	65.4	25.5469	no	240	63	3.76	Positive	Positive	9	4	2	2	3	17	2	0.5	1	0	1	0	0
no	726	Female	60	40				156	47.5	19.5184	no	240	12	3.28	negative	negative	2	1	0	0	4	3	1	0	0	0	1	0	0
no	727	Female	50	30				155	55.5	23.1009	no	240	33	3.18	Positive	Positive	0	0	0	0	0	0	0	0	0	1	0	0	0
no	728	Female	48	28				158	72.2	28.9216	no	240	11	3.28	negative	Positive	1	1	2	2	3	6	1	0	0	0	0	0	0
no	729	Female	61	41				150	54.2	24.0889	no	240	45	4.06	negative	Positive	9	8	8	8	4	33	3	1.88	1	0	0	0	0
no	730	Female	52	32				163	60.9	22.9214	no	240	88	14.4	Positive	Positive	10	15	10	10	5	45	3	2.375	1	1	0	0	1
no	731	Female	60	40				155	60.4	25.1405	no	240	70	88.6	negative	negative	0	0	2	2	0	4	1	0	0	0	0	0	1
no	732	Female	48	28				153	38.7	16.5321	no	240	91	24.6	Positive	Positive	18	18	4	4	4	44	3	1.125	1	0	0	0	0
no	733	Female	66	46				152	49.4	21.3816	no	240	34	3.3	Positive	Positive	11	8	7	8	6	34	3	0.75	1	0	0	0	0
no	734	Female	58	38				150	48.2	21.4222	no	240	32	3.26	negative	negative	2	1	10	9	2	22	3	1.845	1	1	0	0	1
no	735	Female	68	48				150.005	53.1	23.5984	no	240	120	31.4	Positive	Positive	22	20	10	10	7	62	3	2	1	0	0	0	0
no	736	Female	51	31				158	58.7	23.5139	no	240	72	30.6	Positive	Positive	11	11	5	6	8	33	3	2.125	1	1	0	0	0
no	737	Female	63	43				160	60.9	23.7891	no	240	68	30.2	Positive	Positive	10	6	10	8	2	34	3	1.62	1	0	0	0	0
no	738	Female	60	40				143	51	24.9401	no	240	82	23.7	Positive	negative	0	0	6	6	5	12	2	1.125	1	0	0	0	0
no	739	Female	63	43				153	49.9	21.3166	no	240	11	3.14	Positive	Positive	4	2	5	4	2	15	2	0.625	1	0	0	0	0
no	740	Female	42	42		1997-01-01		156	48.1	19.765	no	245	43	10.7	Positive	Positive	3	0	6	6	5	15	2	0.5	1	1	0	1	0
no	741	Female	67	47				148	44.9	20.4985	no	246	5	3.28	negative	Positive	1	1	2	2	4	6	1	0.25	1	0	0	0	0
yes	742	Female	69	49	59.9808	2000-03-11	2011-01-01	164	64.4	23.9441	no	247	120	40.6	Positive	Positive	26	25	6	6	6	63	3	1.5	1	1	0	0	0
no	743	Female	62	42		2000-07-22		152	55.7	24.1084	no	248	63	20.2	Positive	Positive	2	2	8	8	6	20	2	2.5	1	0	0	0	1
no	744	Female	64	43		2000-12-03		155	50.8	21.1446	no	250	59	14	Positive	negative	8	7	6	6	5	27	3	0.625	1	0	0	1	0
no	745	Female	64	43		2000-11-03		153	51.4	21.9574	no	251	98	49.4	Positive	Positive	8	8	3	3	2	22	3	0.125	1	0	0	0	0
no	746	Female	66	45		2000-01-13		150	44.8	19.9111	no	251	75	30	negative	Positive	7	3	3	5	5	18	2	1	1	0	0	0	0
no	747	Female	63	42		2000-01-09		152	37.9	16.4041	no	251	110	24.5	Positive	Positive	6	4	8	8	6	26	3	2.25	1	0	0	0	0
no	748	Female	64	43				158	55.5	22.232	no	252	58	22.3	Positive	Positive	10	3	9	8	3	30	3	1.375	1	0	0	0	0
no	749	Female	57	35.3333				155	53.3	22.1852	no	260	23	3.14	Positive	Positive	7	4	2	2	2	15	2	0.375	1	1	1	0	0
no	750	Female	60	38				151	44.5	19.5167	no	264	25	42.3	Positive	Positive	20	18	6	6	9	50	3	1.875	1	1	0	1	0
no	751	Female	44	22				157	50	20.2848	no	264	22	3.23	Positive	Positive	0	0	0	0	0	0	0	0	0	0	0	0	0
no	752	Female	53	31				149	62.5	28.1519	no	267	42	11.9	Positive	Positive	2	2	5	5	4	14	2	0.25	1	1	0	0	0
no	753	Female	40	17		1998-01-01		158	54.3	21.7513	no	273	18	2.98	negative	negative	4	1	3	3	3	11	2	0	0	0	0	0	0
no	754	Female	65	42				150	54.9	24.4	no	276	73	15.4	Positive	Positive	15	3	3	3	0	24	3	1	1	0	0	0	0
no	755	Female	63	40		1997-06-30		151	48.6	21.3149	no	282	10	3.3	Positive	Positive	2	2	0	0	2	4	1	0	0	0	0	0	0
no	756	Female	62	37				142	42	20.8292	no	303	26	3.28	Positive	Positive	5	3	4	4	2	16	2	0.625	1	1	0	0	1
no	757	Female	60	34				161	51.4	19.8295	no	308	16	3.28	Positive	Positive	0	0	1	1	2	2	0	0	0	0	0	0	0
no	758	Female	46	18				158	51.7	20.7098	no	336	35	7.39	Positive	negative	2	1	6	7	6	16	2	0.125	1	0	0	0	1
no	759	Female	58	30				158	59.6	23.8744	no	336	23	3.28	Positive	Positive	1	1	4	4	2	10	2	0.75	1	0	0	0	0
no	760	Female	60	30				153	40.6	17.3438	no	360	108	13.6	Positive	Positive	13	10	5	5	4	33	3	0.88	1	0	0	0	1
no	761	Female	71	41				148	58.5	26.7075	no	360	32	3.28	negative	negative	16	15	8	8	7	47	3	1.62	1	0	0	0	0
no	762	Female	61	31				158	42.6	17.0646	no	360	50	18.1	negative	negative	0	0	8	8	2	16	2	2	1	0	1	0	0
no	763	Female	78	47		1990-03-03		150	41.4	18.4	yes	369	74	4.13	Positive	Positive	27	7	9	8	8	51	3	2.375	1	1	1	1	1
no	764	Female	65	32		1988-06-13		162	68.1	25.9488	no	385	130	59.6	Positive	Positive	3	5	3	3	2	14	2	0.125	1	0	0	0	0
no	765	Female	62	29.5				150	39.2	17.4222	no	390	31	3.08	Positive	Positive	0	0	7	5	1	12	2	0.875	1	0	0	0	0
no	766	Female	55	22		1988-02-09		155	52.2	21.7274	no	397	93	30.5	Positive	Positive	2	1	3	3	2	9	1	0.25	1	0	0	0	0
no	767	Female	60	23		1983-09-12		158	72.1	28.8816	no	443	31	3.11	negative	negative	1	0	3	2	2	6	1	0.125	1	1	0	0	1
no	768	Female	61	21				150	50.3	22.3556	no	480	50	3.84	Positive	negative	0	0	2	2	2	4	1	0	0	0	0	0	0
no	769	Female	73	33				155	47.9	19.9376	no	480	115	50.1	Positive	Positive	1	1	5	5	2	12	2	1.5	1	0	0	0	0
no	770	Female	69	29				148	44.8	20.4529	no	480	57	19.2	Positive	negative	6	2	8	8	8	24	3	2.625	1	0	0	0	0
no	771	Female	71	31				172	72	24.3375	no	480	7	3.98	negative	negative	1	1	4	4	4	10	2	0.875	1	1	0	1	1
no	772	Female	66	25		1980-12-03		155	53.4	22.2268	no	490	60	40.9	Positive	Positive	3	2	6	6	6	17	2	1	1	0	0	0	0
no	773	Female	66	22				158	42.8	17.1447	no	528	55	61.2	negative	negative	23	11	4	5	3	43	3	2.375	1	1	0	0	0
no	774	Female	75	29		1975-01-01		152	64.5	27.9172	no	559	48	43.9	Positive	negative	16	0	4	5	4	25	3	1.25	1	0	0	0	0
no	775	Female	71	70				143	54.1	26.4561	no	18	25	3.13	negative	Positive	3	3	4	4	8	14	2	1.875	1	0	0	1	0
no	776	Female	25	23				152	38.7	16.7503	no	26	21	6.16	negative	negative	0	0	0	0	0	0	0	0	0	0	0	0	0
no	777	Female	44	41				152	40.9	17.7026	no	36	36	5.9	Positive	Positive	7	7	3	2	2	19	2	0	0	0	0	0	1
no	778	Female	30	27				164	52.8	19.6312	no	37	14	3.28	Positive	negative	1	1	2	2	4	6	1	0.25	1	0	0	1	0
no	779	Female	47	44				155	43.9	18.2726	no	37	33	25.1	Positive	Positive	2	1	6	6	3	15	2	0.125	1	1	0	0	0
no	780	Female	35	31				162	53.1	20.2332	no	48	5	3.13	negative	Positive	10	0	4	4	6	18	2	0.25	1	1	1	1	0
no	781	Female	59	53		2015-01-01		159	55.8	22.0719	no	59	29	5.29	negative	negative	0	2	1	1	2	4	1	0	0	0	0	0	1
no	782	Female	44	39		2015-09-15		160	47.9	18.7109	no	59	50	14.3	Positive	negative	8	0	5	5	1	18	2	0.75	1	0	0	0	0
no	783	Female	49	44				162	64	24.3865	no	60	26	4.84	negative	negative	13	0	3	3	2	19	2	0.25	1	0	0	0	0
no	784	Female	69	64				150	39.8	17.6889	no	60	18	3.28	Positive	negative	3	1	5	3	2	12	2	0	0	0	0	0	0
no	785	Female	69	64				160	64.3	25.1172	no	60	46	9.78	Positive	negative	0	0	2	2	0	4	1	0.125	1	1	0	1	0
no	786	Female	25	19				170	53.3	18.4429	no	74	12	3.3	Positive	negative	0	0	8	7	5	15	2	0.12	1	0	0	0	0
no	787	Female	40	33				163	65.8	24.7657	no	90	16	1.44	Positive	Positive	0	0	0	0	0	0	0	0	0	0	0	0	0
no	788	Female	54	45				155	49.2	20.4787	no	108	77	83.42	Positive	negative	10	10	8	8	6	36	3	1.5	1	1	1	0	0
no	789	Female	55	46				160	60.8	23.75	no	108	122	32.7	Positive	Positive	8	8	7	7	6	30	3	1.25	1	0	0	0	0
no	790	Female	66	56				148	45.4	20.7268	no	120	132	48.7	Positive	Positive	10	6	6	6	6	28	3	2	1	1	0	0	1
no	791	Female	54	44				156	48.1	19.765	no	120	60	3.3	Positive	Positive	3	1	0	0	1	4	1	0	0	0	0	0	0
no	792	Female	62	52				156	52.6	21.6141	no	120	23	4.25	negative	negative	0	0	3	3	2	6	1	0.375	1	1	0	0	1
no	793	Female	42	31		2011-01-01		160	52	20.3125	no	130	33	13.1	Positive	Positive	2	2	1	1	2	6	1	0.125	1	0	0	0	0
no	794	Female	62	49				154	81.7	34.4493	no	153	53	10.2	Positive	Positive	0	0	3	2	2	5	1	0	0	0	0	0	1
no	795	Female	60	40		2001-07-06		155	53	22.0604	no	237	11	3.13	Positive	Positive	0	0	7	5	0	12	2	1.375	1	0	0	0	0
no	796	Female	55	20				150	51.2	22.7556	no	420	64	3.13	Positive	Positive	10	16	5	5	6	36	3	0.625	1	0	0	0	0
no	797	Female	65	65		2021-10-01		161	56.7	21.8742	no	#REF!	72	3.13	Positive	Positive	1	0	0	1	3	2	0	0	0	1	1	0	1
no	798	Female	55	29		1996-01-01		160	60.3	23.5547	no	#REF!	52	3.3	Positive	Positive	10	9	7	7	4	33	3	0.875	1	0	0	0	0
no	799	Female	59	49		2012-08-01		157	53.6	21.7453	no	#REF!	37	3.3	Positive	Positive	0	0	8	6	8	14	2	0.5	1	1	1	0	0
no	800	Female	30	24		2015-07-25		157	50.7	20.5688	no	#REF!	16	3.3	Positive	Positive	0	0	0	0	0	0	0	0	0	1	1	0	0
no	801	Female	56	56		2021-11-04		148	51.8	23.6486	no	#REF!	59	87.1	negative	negative	7	5	3	3	2	18	2	0.25	1	1	0	1	0
no	802	Female	50	47				158	56.1	22.4724	no	36	45	3.3	Positive	Positive	1	1	5	5	5	12	2	0.375	1	0	0	0	0
no	803	Female	72	71		2021-04-01		148	47.3	21.5942	no	#REF!	38	5.88	negative	negative	28	24	7	5	7	64	3	2.25	1	0	0	0	0
no	804	Female	18	15		2020-10-01		153	37.3	15.934	no	#REF!	40	2.86	Positive	negative	1	0	5	3	1	9	1	0.5	1	0	1	0	1
no	805	Female	45	45		2021-05-01		154	51.6	21.7575	no	#REF!	9	4.79	Positive	Positive	6	6	7	7	5	26	3	0.625	1	0	0	0	1
no	806	Female	43	40		2019-04-11		159	58	22.9421	no	#REF!	29	3.3	Positive	Positive	1	0	3	2	2	6	1	0.375	1	0	0	0	0
no	807	Female	59	57		2020-01-11		160	81	31.6406	no	#REF!	75	33.5	Positive	Positive	13	13	8	7	7	41	3	1.875	1	1	0	1	1
no	808	Female	49	46		2019-02-11		153	40.2	17.1729	no	#REF!	150	75.1	Positive	Positive	26	0	8	5	6	39	3	1.625	1	1	0	0	1
no	809	Female	18	14		2021-10-11		161	46.4	17.9005	no	#REF!	130	94	Positive	Positive	24	9	6	4	5	43	3	1.375	1	0	1	0	0
no	810	Female	35	23		2010-03-11		158	58.3	23.3536	no	#REF!	54	16.1	Positive	Positive	5	2	6	6	6	19	2	1.25	1	0	0	0	0
no	811	Female	57	52		2016-09-11		161	54.2	20.9097	no	#REF!	45	3.3	negative	Positive	2	2	5	5	4	14	2	1	1	0	0	0	0
no	812	Female	56	52		2017-09-01		150	45.3	20.1333	no	#REF!	63	11.5	Positive	Positive	0	2	3	2	0	7	1	0.5	1	0	0	0	1
no	813	Female	55	52		2019-09-01		151	44.6	19.5605	no	#REF!	8	3.3	Positive	negative	1	1	0	0	1	2	0	0	0	0	0	0	1
no	814	Female	36	36		2021-12-24		162	60.3	22.9767	no	#REF!	25	14.8	Positive	Positive	6	2	2	2	2	12	2	1.625	1	1	1	0	0
no	815	Female	62	52		2012-03-25		155	51.4	21.3944	no	#REF!	64	3.3	Positive	Positive	2	2	2	2	5	8	1	0.375	1	0	1	0	1
no	816	Female	47	37		2012-01-01		150	41.2	18.3111	no	#REF!	55	9.14	Positive	Positive	8	6	8	7	8	29	3	2.25	1	1	0	0	0
no	817	Female	59	48		2010-09-25		155	54.9	22.8512	no	#REF!	23	15	Positive	negative	6	2	2	2	1	12	2	0	0	0	0	0	1
no	818	Female	70	59		2011-12-01		145	37.8	17.9786	no	#REF!	22	10.6	negative	Positive	9	3	1	1	1	14	2	0.125	1	0	0	0	0
no	819	Female	72	64		2014-07-01		143	41.5	20.2944	no	#REF!	51	17.8	Positive	Positive	10	0	2	2	2	14	2	0.5	1	0	0	0	0
no	820	Female	34	33		2021-12-01		156	60.1	24.6959	no	#REF!	45	3.34	Positive	Positive	6	4	0	0	1	10	2	0	0	0	0	0	0
no	821	Female	37	37		2022-01-01		173	57.8	19.3124	no	#REF!	38	16.3	negative	negative	12	10	4	4	5	30	3	1	1	1	0	0	0
no	822	Female	47	42		2017-01-01		153	57.3	24.4778	no	#REF!	55	44.1	Positive	Positive	7	4	6	4	5	21	2	0.75	1	1	0	0	0
no	823	Female	28	20		2015-01-01		157	44.7	18.1346	no	#REF!	60	21.3	Positive	negative	15	3	2	2	2	22	3	0.125	1	0	0	0	1
no	824	Female	61	59		2020-06-01		155	53.2	22.1436	no	#REF!	16	3.3	negative	Positive	4	0	1	1	1	6	1	0.125	1	1	0	0	0
no	825	Female	55	45		2012-01-25		157	53.3	21.6236	no	#REF!	23	4.65	Positive	Positive	18	4	6	4	5	32	3	0.625	1	0	0	0	0
yes	826	Female	55	51	44.4082	2018-04-25	2011-01-01	150	40.5	18	no	#REF!	14	3.3	Positive	Positive	8	3	4	2	2	17	2	0	0	0	0	0	1
no	827	Female	43	33		2012-04-26		151	45.3	19.8675	no	#REF!	13	3.3	negative	negative	0	0	0	0	0	0	0	0	0	1	0	0	1
no	828	Female	56	45		2011-04-01		158	55.2	22.1118	no	#REF!	27	3.3	Positive	Positive	16	3	4	2	2	25	3	0	0	1	0	0	0
no	829	Female	53	38		2007-04-01		156	47.7	19.6006	no	#REF!	18	6.38	negative	negative	28	24	8	4	4	64	3	1	1	0	0	0	0
no	830	Female	59	56		2019-04-26		156	55.6	22.8468	no	#REF!	10	3.3	negative	Positive	1	1	1	1	1	4	1	0	0	0	0	0	0
no	831	Female	38	36		2021-01-26		160	56.1	21.9141	no	#REF!	26	3.3	Positive	Positive	0	0	0	0	0	0	0	0	0	0	0	1	0
no	832	Female	60	25		1987-04-26		160	57.3	22.3828	no	#REF!	100	27.1	Positive	negative	1	1	8	8	5	18	2	0.875	1	0	0	0	0
no	833	Female	35	31		2017-12-26		157	49.9	20.2442	no	#REF!	81	14.8	Positive	Positive	7	0	5	5	4	17	2	0.75	1	0	0	1	0
no	834	Female	30	25		2017-03-28		158	50.7	20.3092	no	#REF!	14	3.3	negative	negative	0	0	1	0	0	1	0	0	0	1	0	0	1
no	835	Female	66	62		2018-04-28		152	62.2	26.9217	no	#REF!	38	5.21	Positive	Positive	1	0	4	4	4	9	1	0.625	1	0	0	0	1
no	836	Female	73	69		2018-08-01		160	61.4	23.9844	no	#REF!	20	3.3	Positive	Positive	0	0	5	3	0	8	1	1	1	0	0	0	0
no	837	Female	49	25		1998-01-09		160	54.2	21.1719	no	#REF!	52	5.71	Positive	Positive	0	0	3	2	1	5	1	0.5	1	0	1	0	1
no	838	Female	32	25		2015-11-01		163	48.2	18.1414	no	#REF!	27	15.7	negative	negative	4	0	4	2	2	10	2	0.375	1	0	0	0	1
no	839	Female	67	47		2002-01-01		155	57.6	23.975	no	#REF!	27	3.3	negative	negative	9	1	4	4	4	18	2	0.875	1	0	0	1	1
no	840	Female	64	58		2016-06-01		150	44.2	19.6444	no	#REF!	33	3.3	negative	negative	5	1	4	2	4	12	2	0	0	0	0	0	0
no	841	Female	65	47		2004-05-30		151	48.4	21.2271	no	#REF!	44	3.3	Positive	Positive	10	2	4	4	4	20	2	0.5	1	1	0	0	0
no	842	Female	70	60		2012-05-01		164.014	48.6741		no	#REF!	116	17	negative	negative	11	10	8	8	6	37	3	1.625	1	0	0	0	0
no	843	Female	45	41		2018-11-01		156	57.4	23.5865	no	#REF!	27	15.8	Positive	Positive	5	1	2	2	2	10	2	0.25	1	0	0	0	0
no	844	Female	53	53		2022-03-17		165	52	19.1001	no	#REF!	59	16.9	negative	negative	12	10	4	4	2	30	3	0.75	1	1	1	1	0
no	845	Female	56	54		2020-06-01		160	48.7	19.0234	no	#REF!	73	7.43	Positive	Positive	8	4	2	2	2	16	2	0.75	1	1	1	0	0
no	846	Female	32	29		2019-05-01		167	52.6	18.8605	no	#REF!	27	3.3	Positive	Positive	5	0	6	5	2	16	2	0.875	1	1	0	0	0
no	847	Female	57	57		2021-12-01		154	51.2	21.5888	no	#REF!	47	15.3	Positive	Positive	1	0	1	1	1	3	1	0.125	1	1	0	0	0
no	848	Female	64	21		1978-06-13		159	58.4	23.1004	no	#REF!	57	11.8	Positive	Positive	4	4	6	6	5	20	2	0.5	1	0	0	0	0
no	849	Female	51	34		2005-02-08		150	56.7	25.2	no	#REF!	98	12.1	Positive	Positive	6	5	7	6	7	24	3	0.875	1	0	0	0	1
no	850	Female	54	53		2021-08-17		152	46	19.91	no	#REF!	74	13.9	Positive	Positive	9	2	6	4	4	21	2	0.5	1	0	0	0	0
no	851	Female	58	55		2019-05-17		168	78	27.6361	no	#REF!	61	38.8	negative	Positive	23	20	8	8	7	59	3	1.625	1	0	0	0	0
no	852	Female	34	28		2016-07-01		160	57	22.2656	no	#REF!	10	3.3	Positive	Positive	2	1	4	3	2	10	2	0.375	1	1	1	0	0
no	853	Female	51	51		2022-02-17		150	51.8	23.0222	no	#REF!	23	3.3	Positive	negative	2	0	2	2	2	6	1	0	0	0	0	0	0
no	854	Female	52	49		2019-02-01		160	65.9	25.7422	no	#REF!	24	3.3	Positive	negative	2	0	0	0	2	2	0	0	0	0	0	0	0
no	855	Female	47	44				60	58.8	163.333	no	36	40	10.4	Positive	negative	2	2	5	2	2	11	2	0	0	1	0	0	0
no	856	Female	39	27		2009-08-01		156.255	37.4488		no	#REF!	34	1.29	Positive	negative	6	2	6	6	6	20	2	0.875	1	0	0	0	1
no	857	Female	66	64		2020-06-01		163	62.9	23.6742	no	#REF!	95	50.1	Positive	negative	3	3	5	5	6	16	2	0.75	1	0	0	1	0
no	858	Female	49	36		2009-06-20		146	57.3	26.8812	no	#REF!	18	3.3	Positive	negative	0	0	3	3	4	6	1	0	0	0	0	0	1
no	859	Female	20	17		2019-07-01		153	42.2	18.0273	no	#REF!	65	21.2	negative	negative	0	1	4	2	0	7	1	0	0	0	0	0	0
no	860	Female	47	46		2021-12-22		156	48.2	19.806	no	#REF!	39	31.1	negative	negative	10	10	5	5	6	30	3	0.625	1	0	0	0	1
no	861	Female	59	39		2002-07-01		154	44.9	18.9324	no	#REF!	5	3.34	Positive	Positive	5	3	4	4	2	16	2	0.75	1	1	0	1	1
no	862	Female	64	64		2022-02-01		150	56.8	25.2444	no	#REF!	127	37.9	Positive	Positive	8	8	5	5	2	26	3	0.25	1	0	0	0	0
no	863	Female	77	75		2020-07-08		155	43.2	17.9813	no	#REF!	90	46.7	Positive	Positive	4	3	5	5	4	17	2	1.125	1	0	0	0	1
no	864	Female	44	42		2020-12-08		158	64.3	25.7571	no	#REF!	18	3.3	Positive	negative	1	0	0	0	1	1	0	0	0	0	0	0	0
no	865	Female	67	67		2022-05-08		159	50.2	19.8568	no	#REF!	82	5.11	Positive	Positive	5	2	5	4	2	16	2	0.375	1	0	0	0	0
no	866	Female	54	42		2010-07-20		161	75.3	29.0498	no	#REF!	33	5.38	negative	Positive	1	3	6	6	6	16	2	1.125	1	0	0	0	0
no	867	Female	51	50		2021-10-01		160	63.1	24.6484	no	#REF!	13	3.3	Positive	Positive	2	1	0	0	1	3	1	0	0	0	0	0	0
no	868	Female	57	53		2018-07-08		152	50.4	21.8144	no	#REF!	81	9.33	Positive	Positive	5	2	7	6	7	20	2	1.25	1	1	0	0	0
no	869	Female	67	64		2019-07-14		144	60.3	29.0799	no	#REF!	30	3.34	Positive	negative	9	1	2	2	0	14	2	0	0	0	0	0	0
no	870	Female	55	35		2002-07-13		152	56.3	24.3681	no	#REF!	99	13.4	Positive	Positive	14	2	10	7	8	33	3	2	1	0	0	0	0
no	871	Female	68	68		2022-01-01		148	55.5	25.3378	no	#REF!	16	3.34	negative	negative	7	3	4	4	2	18	2	1	1	1	0	0	0
no	872	Female	47	36		2011-07-13		160	43.4	16.9531	no	#REF!	62	3.34	Positive	Positive	0	2	2	4	1	8	1	1	1	0	0	0	0
no	873	Female	53	52		2021-06-01		155	45.1	18.7721	no	#REF!	80	9.66	Positive	Positive	1	1	2	1	1	5	1	0	0	0	0	0	0
yes	874	Female	52	32	49.2959	2002-07-14	2019-08-06	160	78.6	30.7031	no	#REF!	22	4.1	Positive	Positive	0	1	2	2	1	5	1	0.125	1	0	1	0	1
no	875	Female	49	45		2018-07-14		155	51.6	21.4776	no	#REF!	17	3.3	Positive	Positive	4	0	1	1	1	6	1	0.125	1	0	0	0	0
no	876	Female	56	34		2000-07-14		158	40.5	16.2234	no	#REF!	18	3.34	Positive	negative	14	5	4	2	2	25	3	0	0	0	0	0	0
no	877	Female	85	79		2016-07-15		161.535	64.551		no	#REF!	9	3.34	negative	negative	0	0	0	0	0	0	0	0	0	0	0	0	0
no	878	Female	53	45		2013-10-15		150	37.4	16.6222	no	#REF!	5	3.34	Positive	Positive	0	0	3	1	0	4	1	0.25	1	0	0	0	0
no	879	Female	56	52		2018-07-28		157	59.7	24.22	no	#REF!	33	5.68	Positive	negative	0	0	0	0	0	0	0	0	0	1	0	1	0
no	880	Female	51	51		2022-02-01		149	43.9	19.7739	no	#REF!	70	10.5	Positive	Positive	7	7	5	5	2	24	3	1.125	1	1	0	0	1
no	881	Female	37	36		2020-09-27		163	79	29.7339	no	#REF!	17	3.34	Positive	Positive	0	0	0	0	0	0	0	0	0	1	0	1	1
no	882	Female	63	60		2020-01-01		150	66.1	29.3778	no	#REF!	35	3.34	Positive	negative	1	0	6	4	6	11	2	0.125	1	1	0	0	0
no	883	Female	51	51		2018-01-01		152	74.7	32.3321	no	#REF!	11	3.3	negative	negative	20	15	10	10	0	55	3	2.125	1	0	0	0	0
no	884	Female	40	40		2021-07-03		165	54.7	20.0918	no	#REF!	55	35.7	Positive	Positive	12	0	4	4	4	20	2	1	1	0	0	0	0
no	885	Female	65	55		2001-07-15		150.555	48.0513		no	#REF!	90	50.6	Positive	negative	11	14	7	7	5	39	3	2	1	0	0	0	1
no	886	Female	54	51		2009-05-01		165.718	54.7381		no	36	18	7.33	Positive	negative	3	3	4	3	2	13	2	0.15	1	0	0	0	0
no	887	Female	71	69		2009-06-01		155.391	45.24		no	24	107	22.3	Positive	Positive	15	25	6	6	8	52	3	2.2	1	0	0	0	1
no	888	Female	40	40		2011-03-01		157	66	26.7759	no	#REF!	43	16.7	Positive	Positive	4	2	6	6	3	18	2	0.85	1	1	0	0	0
no	889	Female	65	65		2011-05-01		143.648	50.503		no	3	130	42.8	Positive	Positive	10	10	7	7	7	34	3	1.2	1	0	0	0	0
no	890	Female	60	59		2013-03-01		160.981	43.6021		no	11	105	63.2	Positive	Positive	15	7	7	7	7	36	3	1.75	1	0	0	0	0
no	891	Female	46	35		2003-01-01		154.617	50.2615		no	108	63	3.36	negative	Positive	13	11	6	6	6	36	3	0.75	1	0	0	0	0
no	892	Female	69	69		2014-02-01		159.836	45.0293		no	#REF!	60	39.2	negative	Positive	4	5	4	4	3	17	2	1	1	1	0	0	0
no	893	Female	39	30		2005-03-01		172.205	59.8944		no	108	97	66.4	Positive	Positive	6	7	5	5	3	23	3	0.875	1	1	0	1	1
no	894	Female	65	55		2004-03-01		148.322	39.6185		no	#REF!	93	124	Positive	Positive	10	10	7	7	7	34	3	2.375	1	0	0	0	0
no	895	Female	59	58		2013-03-01		154	50	21.0828	no	12	67	64.8	Positive	Positive	8	5	3	3	6	19	2	1	1	0	0	0	0
no	896	Female	58	56		2014-01-01		167.884	72.3961		no	18	52	14.1	Positive	Positive	8	5	6	6	6	25	3	1.25	1	0	0	0	0
no	897	Female	78	70		2006-06-01		168.402	51.9068		no	96	74	31.9	Positive	Positive	0	2	6	6	0	14	2	1.25	1	0	0	0	0
no	898	Female	46	41		2009-06-01		168.178	68.7845		no	60	57	36.2	Positive	Positive	17	14	7	7	7	45	3	2.25	1	0	0	0	0
no	899	Female	55	45		2004-04-01		151.58	40.2598		no	#REF!	61	12.7	Positive	Positive	28	0	7	7	7	42	3	2.75	1	0	0	0	0
no	900	Female	50	43		2007-01-01		171.65	69.4092		no	84	124	122	Positive	negative	11	19	7	7	7	44	3	1.875	1	1	0	0	0
no	901	Female	59	59		2014-07-01		154	50	21.0828	no	#REF!	46	3.23	negative	negative	5	0	3	3	3	11	2	0	0	0	0	1	1
no	902	Female	55	54		2013-08-01		152	46	19.91	no	#REF!	94	28.4	Positive	Positive	23	12	8	8	8	51	3	1.625	1	0	0	0	0
no	903	Female	70	70		2014-07-01		156.565	68.8929		no	1	37	11.7	Positive	Positive	9	1	6	6	7	22	3	0.125	1	0	0	0	0
no	904	Female	48	28		1994-01-01		155.661	50.5684		no	240	88	30.5	Positive	Positive	27	24	7	7	7	65	3	1.875	1	0	0	0	0
no	905	Female	63	53		2004-07-01		152.109	60.8636		no	#REF!	28	10.1	negative	negative	0	0	3	3	2	6	1	0.375	1	0	0	0	0
no	906	Female	64	49		2009-10-01		165.924	71.9034		no	180	80	15.3	Positive	Positive	17	13	2	2	4	34	3	0	0	1	0	0	0
no	907	Female	29	21		2007-09-01		164.352	43.9229		no	#REF!	18	3.16	negative	Positive	0	0	0	0	0	0	0	0	0	1	0	0	0
no	908	Female	56	46		2004-12-01		155.393	50.1593		no	120	106	85.2	Positive	Positive	17	9	9	8	8	43	3	2.125	1	0	0	0	0
no	909	Female	66	53		2002-01-01		160.007	52.0178		no	156	110	60.1	Positive	Positive	15	9	7	7	7	38	3	1.75	1	1	0	0	1
no	910	Female	51	47		2011-02-01		161.316	75.8409		no	#REF!	65	30.1	negative	Positive	3	3	6	4	3	16	2	0.375	1	0	0	0	0
no	911	Female	47	46		2014-08-01		149	50	22.5215	no	#REF!	84	54.1	Positive	Positive	10	10	6	6	6	32	3	0.25	1	1	0	1	1
no	912	Female	56	56		2015-03-01		163	68	25.5937	no	#REF!	29	3.28	Positive	Positive	8	8	3	3	6	22	3	0.25	1	0	0	0	0
no	913	Female	66	51		2000-05-01		147.143	43.3567		no	#REF!	127	89.1	Positive	Positive	3	9	7	6	6	25	3	1.125	1	0	0	0	0
no	914	Female	64	44		1995-06-01		148.666	51.9441		no	#REF!	88	76.8	Positive	negative	15	24	9	8	6	56	3	2.125	1	0	0	0	0
no	915	Female	30	19		2004-04-01		157.851	56.9377		no	#REF!	31	22.4	Positive	negative	4	2	7	6	5	19	2	1.125	1	0	0	0	0
no	916	Female	34	32		2013-07-01		156.104	39.0983		no	#REF!	62	38.1	Positive	negative	1	1	1	1	2	4	1	0	0	0	0	0	0
no	917	Female	70	57		2002-04-01		151.865	42.4868		no	#REF!	86	39.7	Positive	Positive	6	4	5	5	3	20	2	1	1	0	0	0	0
no	918	Female	36	30		2009-11-21		158	60.3	24.1548	no	#REF!	12	6.22	Positive	Positive	1	0	0	0	1	1	0	0	0	0	0	0	0
no	919	Female	50	49		2015-08-01		143.341	35.2783		no	6	15	4.81	Positive	negative	1	1	1	1	2	4	1	0.125	1	0	1	0	0
no	920	Female	66	56		2006-05-01		153.475	52.1923		no	#REF!	58	8.62	Positive	Positive	20	18	5	7	6	50	3	1.75	1	0	0	0	0
no	921	Female	78	63		2000-09-01		158.332	53.4104		no	#REF!	62	40	negative	Positive	8	8	8	8	8	32	3	1.375	1	1	0	1	0
no	922	Female	38	36		2014-03-01		162.787	62.5824		no	24	17	3.34	Positive	Positive	0	0	0	0	0	0	0	0	0	0	0	0	0
no	923	Female	68	68		2016-01-01		146	42	19.7035	no	#REF!	105	111	Positive	Positive	13	12	8	8	8	41	3	1.25	1	0	0	0	0
no	924	Female	65	63		2014-04-01		152.855	44.5621		no	#REF!	143	152	Positive	Positive	15	15	8	8	8	46	3	1.875	1	0	0	0	0
no	925	Female	70	69		2016-01-01		156.37	57.7094		no	#REF!	35	4.75	negative	negative	22	15	4	6	6	47	3	0.625	1	0	1	0	1
no	926	Female	61	60		2015-12-01		158.18	67.9799		no	5	53	4.43	negative	Positive	6	4	8	8	8	26	3	1.875	1	1	1	0	0
no	927	Female	49	39		2006-06-17		153.069	54.8002		no	#REF!	8	3.3	negative	Positive	0	0	0	0	0	0	0	0	0	0	0	0	0
no	928	Female	57	55		2014-04-01		171.102	71.0866		no	#REF!	29	6.89	negative	negative	22	18	8	8	8	56	3	2.125	1	1	0	0	0
no	929	Female	77	77		2016-01-01		165	65	23.8751	yes	#REF!	85	147	Positive	Positive	10	12	5	5	6	32	3	1.5	1	1	1	0	0
no	930	Female	57	47		2006-04-01		156.475	52.143		no	#REF!	85	78.5	Positive	negative	16	14	7	7	6	44	3	1.875	1	0	0	0	0
no	931	Female	44	38		2010-04-01		149.989	53.2532		no	72	35	9.94	Positive	Positive	5	6	4	4	4	19	2	0.875	1	0	0	0	0
no	932	Female	38	37		2015-05-01		168.564	76.6547		no	12	7	3.16	Positive	negative	0	0	0	0	0	0	0	0	0	0	0	0	0
no	933	Female	51	48		2013-05-25		154.454	65.5958		no	#REF!	114	63.7	negative	negative	0	0	2	2	2	4	1	0.375	1	0	0	0	0
no	934	Female	60	40		1996-05-01		164.421	56.6015		no	#REF!	108	28.5	Positive	Positive	4	4	8	8	6	24	3	3	1	0	0	0	0
no	935	Female	70	53		1999-08-22		171.615	65.261		no	#REF!	19	3.3	Positive	Positive	8	2	3	3	2	16	2	0.5	1	0	0	0	0
no	936	Female	66	56		2006-06-01		155.618	53.5689		no	#REF!	35	8.34	Positive	Positive	3	3	5	5	3	16	2	1	1	0	0	0	0
no	937	Female	80	70		2006-06-01		162.79	63.8267		yes	#REF!	105	54.3	Positive	Positive	16	14	6	5	5	41	3	1.875	1	0	0	0	0
no	938	Female	54	54		2016-03-01		153.775	50.9145		no	#REF!	46	11.9	Positive	Positive	11	9	8	8	8	36	3	2.375	1	0	0	0	0
no	939	Female	56	51		2011-06-01		165.802	57.3531		no	60	35	22.1	Positive	Positive	7	7	5	5	4	24	3	0.75	1	0	0	0	1
no	940	Female	31	25		2010-06-01		142.321	42.2127		no	72	54	45.2	Positive	negative	3	2	1	1	4	7	1	0.25	1	0	0	0	0
no	941	Female	51	42		2007-06-01		157.728	61.0024		no	#REF!	21	1.15	negative	Positive	10	2	4	4	4	20	2	1.25	1	0	0	0	0
no	942	Female	53	33		1996-06-01		159.885	43.6853		no	#REF!	52	12.5	Positive	Positive	14	13	5	4	4	36	3	1.125	1	0	0	0	0
no	943	Female	68	67		2015-06-01		168	90	31.8878	no	#REF!	81	48.9	Positive	Positive	10	6	8	8	6	32	3	1.25	1	0	0	0	0
no	944	Female	75	75		2016-01-01		158	48	19.2277	no	7	94	44.2	Positive	Positive	0	0	2	2	2	4	1	0.125	1	0	1	1	0
no	945	Female	50	46		2012-08-03		149.481	46.539		no	#REF!	101	38.6	Positive	Positive	6	5	5	4	4	20	2	0.125	1	1	0	0	1
no	946	Female	51	40		2005-07-01		143.733	58.5198		no	#REF!	23	23.7	Positive	Positive	5	1	4	4	4	14	2	1	1	0	0	0	0
yes	947	Female	62	60	62.1315	2014-07-01	2016-07-22	150.224	53.3062		no	24	94	32.8	Positive	Positive	1	1	3	3	4	8	1	0.625	1	0	0	1	0
no	948	Female	59	54		2011-02-01		159.813	74.1851		no	66	40	3.71	Positive	Positive	2	2	4	4	4	12	2	0.25	1	0	1	0	1
no	949	Female	67	60		2010-01-01		146.931	42.1075		no	#REF!	70	52.3	Positive	Positive	1	0	4	4	4	9	1	0.875	1	0	0	1	1
no	950	Female	45	20		1992-08-01		147.376	54.4054		no	#REF!	47	4.44	Positive	negative	10	5	6	6	6	27	3	1.375	1	0	0	0	0
no	951	Female	57	47		2006-08-01		157.147	55.5132		no	#REF!	108	63.9	Positive	Positive	3	4	4	4	6	15	2	0.625	1	0	0	0	0
no	952	Female	42	40		2014-09-01		165.633	56.469		no	23	47	9.42	negative	Positive	23	9	5	5	2	42	3	0.125	1	0	1	0	1
no	953	Female	61	49		2004-05-01		168.68	64.5455		no	#REF!	45	9.84	negative	Positive	2	2	4	4	4	12	2	1.375	1	0	0	0	0
no	954	Female	43	39		2014-09-01		157.345	51.1604		no	47	37	3.59	Positive	Positive	0	0	0	0	4	0	0	0	0	1	0	1	1
no	955	Female	86	56		1986-08-01		154.294	50.3684		no	#REF!	57	49.7	Positive	Positive	7	6	6	6	8	25	3	1.875	1	0	0	0	0
no	956	Female	61	58		2013-11-01		161.228	52.5265		no	#REF!	2	23.6	negative	negative	0	0	0	0	0	0	0	0	0	1	0	0	0
no	957	Female	63	53		2006-08-01		151.251	69.5813		no	#REF!	54	10.5	Positive	Positive	18	6	8	8	8	40	3	1.875	1	0	1	0	1
no	958	Female	78	78		2016-06-01		157.953	48.6762		no	#REF!	68	32.3	Positive	Positive	3	3	3	3	4	12	2	0.625	1	0	0	0	1
no	959	Female	72	70		2014-09-01		159.232	50.8365		no	24	35	3.86	Positive	Positive	8	2	5	5	6	20	2	1.75	1	1	0	1	1
no	960	Female	43	42		2014-09-01		145.889	37.2726		no	24	35	11.7	Positive	Positive	3	3	7	5	6	18	2	0.25	1	0	0	0	0
no	961	Female	62	58		2012-09-01		158.536	58.9632		no	#REF!	5	3.16	negative	negative	0	0	0	0	2	0	0	0.125	1	0	0	1	0
no	962	Female	78	68		2006-09-01		147.84	55.1736		no	120	17	16.2	Positive	negative	2	2	4	4	6	12	2	0.125	1	0	0	0	0
no	963	Female	83	63		1996-09-01		153.064	62.4754		no	240	85	7.44	negative	negative	23	0	8	7	6	38	3	1.125	1	1	0	0	0
no	964	Female	55	35		1996-10-01		171.614	74.8741		no	#REF!	84	27.4	Positive	negative	4	8	8	8	4	28	3	3	1	0	0	0	0
no	965	Female	54	44		2006-11-09		169.385	60.9617		no	#REF!	76	67.8	Positive	Positive	4	3	6	5	6	18	2	0.75	1	1	0	0	0
no	966	Female	69	38		1986-10-01		159.169	66.1225		no	#REF!	71	26.5	Positive	Positive	17	20	8	8	8	53	3	1.625	1	1	0	0	0
no	967	Female	58	43		2002-01-07		144.953	47.3116		no	#REF!	105	10.6	Positive	Positive	0	0	0	0	0	0	0	0	0	0	1	0	0
no	968	Female	56	54		2014-10-01		171.183	59.472		no	#REF!	88	11.1	Positive	Positive	11	4	6	6	4	27	3	1.875	1	0	1	0	0
no	969	Female	62	62		2016-10-01		154	50	21.0828	no	5	85	40.4	Positive	Positive	5	4	5	7	4	21	2	2	1	0	0	0	1
no	970	Female	61	41		1996-12-01		155.017	67.7341		no	240	15	3.11	negative	negative	19	14	6	6	8	45	3	0.75	1	0	0	0	0
no	971	Female	51	50		2016-02-01		160.03	52.5386		no	10	110	43.8	Positive	Positive	11	8	7	7	6	33	3	0.875	1	0	1	0	1
no	972	Female	61	56		2011-08-01		164.262	67.1684		no	63	15	3.11	Positive	negative	0	0	0	0	2	0	0	0	0	0	0	0	0
no	973	Female	73	43		1986-12-01		162.232	68.545		no	#REF!	125	52.8	negative	Positive	12	6	7	8	9	33	3	2	1	0	0	0	1
no	974	Female	39	31		2008-10-01		157.315	61.1268		no	#REF!	48	3.11	Positive	Positive	0	0	4	3	4	7	1	0.375	1	0	0	0	0
no	975	Female	66	47		1998-05-01		134.622	37.2199		no	#REF!	54	16.9	Positive	Positive	28	10	6	4	6	48	3	0.5	1	0	0	0	1
no	976	Female	62	35		1991-01-01		150.365	72.1314		no	312	19	3.11	negative	negative	24	19	2	2	6	47	3	0.25	1	1	0	0	0
no	977	Female	61	57		2013-01-01		153.24	28.4822		no	48	29	5.41	negative	negative	13	3	2	2	2	20	2	0	0	0	0	0	0
no	978	Female	61	58		2014-01-01		162.298	63.1886		no	#REF!	69	16.8	negative	Positive	8	4	10	10	6	32	3	2.375	1	0	0	0	0
no	979	Female	32	27		2012-01-01		161.002	49.0718		no	60	35	17.5	Positive	Positive	8	6	8	8	6	30	3	0.625	1	0	0	1	1
no	980	Female	30	28		2015-01-01		161.909	56.5483		no	26	2	7.74	negative	negative	2	4	4	4	0	14	2	0	0	0	0	0	1
no	981	Female	62	38		1993-01-01		145.852	57.0294		no	#REF!	68	3.11	negative	Positive	26	16	8	8	8	58	3	2.625	1	0	0	0	1
no	982	Female	60	60		2017-01-18		146.27	48.1957		no	24	58	6.58	negative	Positive	1	1	8	8	6	18	2	2.125	1	1	1	1	1
no	983	Female	51	50		2016-03-01		166.165	60.9321		no	12	65	47.2	Positive	Positive	9	9	4	4	6	26	3	1.25	1	1	1	1	0
no	984	Female	29	27		2015-03-01		162.349	59.4946		no	48	11	3.11	Positive	Positive	1	1	2	2	2	6	1	0	0	0	0	0	0
no	985	Female	64	52		2005-04-01		164.648	54.6232		no	136	8	3.02	negative	negative	2	2	0	0	2	4	1	0.125	1	0	0	0	0
no	986	Female	54	45		2008-04-01		155	49.2	20.4787	no	#REF!	77	83.42	Positive	negative	10	10	8	8	6	36	3	1.5	1	0	0	0	0
no	987	Female	40	35		2012-05-01		166.16	67.0561		no	#REF!	18	20.5	Positive	Positive	8	2	4	4	4	18	2	0.25	1	0	0	0	0
no	988	Female	72	25		1970-07-21		142.139	49.1472		no	#REF!	32	5.93	Positive	Positive	2	2	6	6	6	16	2	1.625	1	1	0	0	0
no	989	Female	77	76		2016-06-01		145.882	61.2655		no	#REF!	98	28	Positive	Positive	11	9	8	8	8	36	3	2.375	1	1	0	0	1
no	990	Female	37	17		1997-06-01		155.745	55.8785		no	#REF!	93	31.3	negative	negative	15	8	5	5	3	33	3	0.875	1	0	0	0	0
no	991	Female	62	23		1978-01-11		152.388	46.5759		no	#REF!	72	18.2	Positive	Positive	4	4	6	6	4	20	2	1.875	1	0	0	0	0
no	992	Female	39	38		2017-07-01		162.656	54.6584		no	11	36	3.02	negative	Positive	5	5	5	5	2	20	2	0.375	1	0	0	0	0
no	993	Female	68	64		2013-06-01		151.196	57.0912		no	#REF!	37	3.02	Positive	Positive	3	2	0	0	4	5	1	0	0	0	0	0	0
no	994	Female	71	61		2007-07-01		155.685	63.732		no	#REF!	67	15	Positive	Positive	2	2	2	2	2	8	1	0.25	1	0	0	0	0
no	995	Female	70	63		2010-10-01		180.528	61.3819		no	#REF!	24	3.02	Positive	Positive	2	0	2	2	2	6	1	0.375	1	0	0	0	0
no	996	Female	65	58		2007-08-01		155.224	47.2467		no	84	118	25	Positive	Positive	2	1	8	8	6	19	2	0.75	1	0	0	0	1
no	997	Female	44	35		2008-03-01		162.121	63.92		no	#REF!	77	11.8	Positive	Positive	6	5	5	5	6	21	2	0.5	1	1	0	0	0
no	998	Female	33	30		2014-09-23		148.157	41.3671		no	#REF!	40	3.72	Positive	Positive	2	0	1	1	2	4	1	0	0	1	0	0	0
no	999	Female	42	12		1987-08-01		164.54	58.5221		no	#REF!	8	3.02	negative	negative	0	0	0	0	0	0	0	0	0	0	0	0	0
no	1000	Female	57	42		2002-12-06		164.642	56.7154		no	#REF!	31	3.02	Positive	negative	0	0	1	1	4	2	0	0.5	1	0	0	0	0
no	1001	Female	58	57		2017-04-01		152.005	61.9679		no	#REF!	23	3.12	Positive	Positive	3	2	5	5	3	15	2	0.5	1	0	0	0	0
no	1002	Female	46	46		2017-05-01		146.741	61.7536		no	#REF!	32	3.12	Positive	Positive	2	0	9	5	9	16	2	1	1	0	0	0	0
no	1003	Female	74	33		1977-10-01		151.959	54.0515		no	#REF!	110	38.9	Positive	Positive	28	3	10	10	8	51	3	3	1	0	0	0	0
no	1004	Female	42	32		2007-12-25		144.796	54.8595		no	#REF!	49	4.61	Positive	Positive	3	1	4	4	4	12	2	0.625	1	1	1	1	0
no	1005	Female	71	69		2016-11-01		143	54.1	26.4561	no	#REF!	25	3.13	negative	Positive	3	3	4	4	8	14	2	1.875	1	0	0	0	0
no	1006	Female	59	57		2016-02-01		161.395	63.5605		no	#REF!	28	3.13	Positive	Positive	16	6	4	4	3	30	3	0.375	1	0	0	0	1
no	1007	Female	54	54		2017-07-01		157	65	26.3702	no	#REF!	47	19.6	negative	Positive	7	2	3	3	3	15	2	0.8	1	1	0	0	1
no	1008	Female	53	52		2016-10-01		171.93	65.2488		no	#REF!	20	12.5	Positive	Positive	7	4	5	5	8	21	2	1.125	1	0	0	0	0
no	1009	Female	57	53		2013-12-01		146.257	43.7404		no	48	125	58	negative	negative	0	0	2	2	0	4	1	0	0	0	0	0	0
no	1010	Female	39	39		2017-10-01		160	57	22.2656	no	#REF!	60	16.2	Positive	Positive	19	6	8	8	4	41	3	1.75	1	0	0	0	0
no	1011	Female	53	51		2015-10-01		161.98	60.2545		no	#REF!	16	3.13	negative	negative	9	7	5	5	4	26	3	0.125	1	0	1	1	0
no	1012	Female	32	32		2017-02-01		157	50	20.2848	no	#REF!	81	30	Positive	Positive	9	2	5	5	4	21	2	0.875	1	0	0	1	0
no	1013	Female	47	42		2015-01-01		141.16	55.9864		no	60	77	3.13	negative	Positive	16	7	2	2	2	27	3	0.875	1	0	0	0	1
no	1014	Female	46	46		2017-04-01		151.928	54.1879		no	8	43	19.6	Positive	Positive	9	6	10	8	6	33	3	0.875	1	0	0	0	1
no	1015	Female	35	34		2017-02-01		156.645	45.898		no	#REF!	53	11.5	Positive	Positive	6	5	4	4	2	19	2	0	0	0	0	0	0
no	1016	Female	49	44		2013-02-01		150	53.9	23.9556	no	#REF!	5	3.14	negative	negative	8	8	5	5	2	26	3	0.5	1	0	1	0	0
no	1017	Female	75	73		2016-03-01		160.144	64.9957		no	#REF!	100	13.7	Positive	Positive	7	2	10	8	6	27	3	0.875	1	1	0	0	0
no	1018	Female	42	29		2005-06-01		146.666	52.8295		no	#REF!	40	5.91	negative	Positive	6	6	10	10	8	32	3	1.375	1	0	0	0	0
no	1019	Female	46	45		2017-05-29		161.613	72.6123		no	#REF!	3	3.5	negative	Positive	11	19	5	5	4	40	3	0.625	1	1	0	0	1
yes	1020	Female	49	47	49.3753	2016-08-01	2018-03-20	158.021	53.4781		no	19	39	3.14	Positive	Positive	4	3	3	3	2	13	2	0	0	0	0	0	0
no	1021	Female	62	61		2017-04-28		148	58	26.4792	no	#REF!	41	3.55	negative	negative	0	2	0	0	2	2	0	0.25	1	0	0	0	0
no	1022	Female	49	45		2014-12-01		152.717	40.9302		no	#REF!	36	3.14	negative	Positive	1	0	3	3	2	7	1	0	0	0	0	0	0
no	1023	Female	48	46		2017-02-01		161.952	59.3691		no	#REF!	16	3.14	negative	Positive	0	0	0	0	2	0	0	0.25	1	1	0	1	0
no	1024	Female	47	22		1993-02-11		155.748	52.0945		no	#REF!	24	3.14	Positive	Positive	8	3	2	2	2	15	2	0.375	1	0	0	0	0
no	1025	Female	71	69		2016-04-01		153.294	48.3003		no	24	11	3.14	Positive	negative	5	0	2	2	2	9	1	0.125	1	0	0	0	0
no	1026	Female	63	60		2016-04-01		164.514	64.2466		no	#REF!	125	9.38	Positive	Positive	5	4	2	2	2	13	2	0.875	1	0	0	0	0
no	1027	Female	19	19		2018-03-01		159.076	39.9391		no	2	48	3.14	Positive	Positive	6	0	4	4	2	14	2	0.125	1	0	0	0	0
no	1028	Female	38	32		2012-05-01		155.344	52.4917		no	72	35	3.73	negative	Positive	5	6	2	2	2	15	2	0	0	1	0	0	1
no	1029	Female	62	52		2008-05-01		160.335	49.2335		no	#REF!	40	20.4	Positive	Positive	16	8	4	4	4	32	3	0.75	1	1	0	0	0
no	1030	Female	46	46		2018-02-01		161.908	59.8414		no	4	16	6.02	Positive	negative	0	0	0	0	0	0	0	0	0	0	0	0	0
no	1031	Female	52	26		1992-11-08		160	60.1	23.4766	no	#REF!	89	4.97	Positive	negative	3	10	5	5	5	23	3	0.125	1	1	0	0	0
no	1032	Female	52	42		2008-06-01		158.068	53.1201		no	#REF!	110	39.3	Positive	Positive	12	6	7	7	4	32	3	0.125	1	0	0	0	0
no	1033	Female	56	55		2017-07-01		157.407	59.0442		no	12	22	3.23	negative	Positive	6	0	5	5	5	16	2	0.625	1	0	0	0	0
no	1034	Female	52	52		2018-06-06		147.437	52.4822		no	#REF!	50	14.8	negative	negative	0	0	10	7	10	17	2	0.375	1	0	0	0	1
no	1035	Female	46	45		2018-06-01		158	50	20.0288	no	#REF!	140	111	Positive	Positive	11	10	10	9	8	40	3	2.5	1	0	0	0	1
no	1036	Female	64	62		2016-07-01		164.541	57.1149		no	#REF!	120	17.6	Positive	Positive	12	13	7	7	7	39	3	1.5	1	0	0	0	0
no	1037	Female	62	59		2016-01-01		157.851	45.2089		no	#REF!	83	28.8	Positive	Positive	5	5	8	8	6	26	3	1.75	1	0	0	0	0
no	1038	Female	37	31		2012-07-01		155.843	65.5878		no	72	73	10.6	negative	Positive	6	5	6	6	7	23	3	0.375	1	0	0	0	0
no	1039	Female	53	39		2004-10-11		153.35	38.0532		no	#REF!	110	16.5	Positive	Positive	21	10	10	8	4	49	3	1.625	1	0	0	0	1
no	1040	Female	28	22		2013-01-01		168.817	44.6358		no	68	70	41.4	negative	Positive	6	6	3	3	4	18	2	0.125	1	0	0	0	1
no	1041	Female	57	56		2017-08-06		154	51	21.5045	no	#REF!	119	68.1	negative	negative	28	26	10	10	10	74	3	3	1	0	0	0	1
no	1042	Female	50	43		2011-09-13		159.239	55.244		no	#REF!	128	77	Positive	Positive	5	11	6	6	4	28	3	2.125	1	0	0	0	1
no	1043	Female	53	51		2016-08-01		160.758	66.4573		no	24	12	3.23	negative	negative	0	0	2	2	2	4	1	0.125	1	1	0	0	0
no	1044	Female	58	45		2003-08-01		153.258	54.9148		no	156	31	3.23	Positive	Positive	0	0	3	2	2	5	1	0	0	0	0	0	0
no	1045	Female	47	45		2017-04-01		154.04	63.714		no	17	35	3.23	Positive	Positive	1	1	2	2	2	6	1	0	0	0	0	0	0
no	1046	Female	77	74		2015-03-12		153	55.2	23.5807	no	#REF!	17	3.23	negative	negative	22	5	2	2	2	31	3	1.125	1	0	0	0	0
no	1047	Female	78	76		2016-09-27		170.194	55.5578		no	#REF!	45	4.82	Positive	Positive	4	5	5	5	2	19	2	0	0	1	0	0	0
no	1048	Female	37	35		2017-08-01		167	47.5	17.0318	no	#REF!	15	8.67	Positive	Positive	4	3	10	8	4	25	3	0.25	1	0	0	0	1
no	1049	Female	58	58		2018-05-05		148.861	50.7261		yes	5	26	3.23	negative	negative	2	0	2	2	2	6	1	0	0	0	0	0	0
no	1050	Female	34	33		2018-03-01		156.893	46.7945		no	8	57	7.47	Positive	Positive	19	14	3	3	3	39	3	1	1	0	0	0	0
no	1051	Female	70	55		2003-12-01		151.35	41.4414		no	180	87	28.8	negative	Positive	9	4	9	9	6	31	3	1.75	1	0	0	0	0
no	1052	Female	69	14		1964-01-01		156.146	56.442		no	#REF!	42	20.6	Positive	negative	2	1	2	2	4	7	1	0.125	1	1	0	0	0
no	1053	Female	56	55		2019-05-01		160.713	56.2574		no	7	36	17.8	negative	negative	0	0	1	1	0	2	0	0	0	1	0	0	1
no	1054	Female	61	60		2017-10-31		151.053	56.4047		no	#REF!	15	3.13	Positive	Positive	0	0	2	2	0	4	1	0	0	0	0	0	0
no	1055	Female	75	72		2016-02-01		147.563	41.0588		no	#REF!	158	68.4	negative	negative	4	4	6	6	6	20	2	1.75	1	0	0	0	0
no	1056	Female	50	47		2016-06-01		163.769	56.0818		no	#REF!	50	8.27	negative	negative	8	4	6	6	3	24	3	1.25	1	0	0	0	0
no	1057	Female	38	38		2019-04-01		153.311	50.2784		no	2	14	3.13	Positive	Positive	1	0	3	3	4	7	1	0.125	1	1	0	0	1
no	1058	Female	53	52		2018-08-28		151	62	27.1918	no	#REF!	111	63	negative	negative	6	6	4	5	6	21	2	1.5	1	0	0	0	0
no	1059	Female	77	36		1979-06-01		148.747	44.6073		no	#REF!	52	48.8	Positive	Positive	10	6	8	8	6	32	3	2.75	1	1	0	0	0
no	1060	Female	54	38		2003-05-28		149.829	43.9783		no	#REF!	63	13.7	Positive	Positive	27	7	2	2	6	38	3	0.875	1	0	1	1	1
no	1061	Female	50	44		2013-07-01		146.243	51.4415		no	#REF!	16	3.02	negative	Positive	2	1	5	2	3	10	2	0.625	1	1	0	0	0
no	1062	Female	41	35		2013-07-01		154.238	50.1443		no	#REF!	76	16.8	Positive	negative	8	0	4	3	2	15	2	0	0	1	0	1	0
no	1063	Female	66	65		2018-02-01		167.739	64.3361		no	#REF!	105	195	Positive	Positive	27	1	10	9	4	47	3	2.875	1	1	0	1	0
no	1064	Female	59	54		2015-05-15		162.894	59.7363		no	#REF!	70	72.3	Positive	Positive	26	18	9	7	7	60	3	1.5	1	1	0	0	0
no	1065	Female	31	20		2008-09-01		143.022	44.6769		no	#REF!	27	3.3	negative	negative	0	0	0	0	0	0	0	0	0	1	0	0	0
no	1066	Female	54	44		2009-09-01		153.744	61.5081		no	#REF!	14	3.11	Positive	negative	2	1	10	10	6	23	3	2.5	1	0	0	0	0
no	1067	Female	71	65		2013-08-02		148.155	44.9572		no	#REF!	50	3.11	Positive	Positive	4	2	3	3	3	12	2	1.5	1	1	0	0	0
no	1068	Female	64	60		2015-04-01		153.123	58.4557		no	#REF!	127	26.4	Positive	Positive	28	24	7	7	7	66	3	2.375	1	0	0	0	1
no	1069	Female	57	48		2011-04-25		147.539	45.9774		no	#REF!	27	7.87	Positive	Positive	2	2	8	6	7	18	2	1.375	1	0	0	0	0
no	1070	Female	61	56		2014-11-01		143.019	46.3933		yes	#REF!	122	153	Positive	Positive	14	2	4	4	3	24	3	0.5	1	0	0	0	0
no	1071	Female	68	63		2014-10-15		161.828	54.4796		no	#REF!	98	54.6	Positive	Positive	16	0	5	4	3	25	3	0.625	1	0	0	0	1
no	1072	Female	58	54		2015-04-01		161.728	54.7175		no	#REF!	18	3.11	negative	Positive	17	4	5	5	6	31	3	0.75	1	0	0	0	1
no	1073	Female	67	60		2012-10-14		160.377	58.4078		no	#REF!	47	3.14	Positive	Positive	0	0	10	8	4	18	2	1.25	1	1	0	0	0
no	1074	Female	68	65		2017-04-11		152.333	55.2781		no	#REF!	72	25.6	negative	negative	5	2	5	4	4	16	2	0.375	1	1	0	0	1
no	1075	Female	24	21		2017-02-02		168.343	53.9588		no	#REF!	36	25	Positive	Positive	2	3	2	2	2	9	1	0	0	1	1	1	1
no	1076	Female	72	70		2018-09-01		158.398	62.4819		no	#REF!	115	92.1	Positive	Positive	4	0	6	5	3	15	2	1	1	0	0	0	0
no	1077	Female	48	48		2020-01-30		162.47	46.3361		no	#REF!	67	21.7	negative	negative	7	1	5	5	4	18	2	0.125	1	1	0	0	1
no	1078	Female	50	48		2018-08-11		160	42.4	16.5625	no	#REF!	75	15.7	negative	Positive	7	6	7	7	6	27	3	0.875	1	0	1	0	1
no	1079	Female	60	59		2020-01-12		158.5	58.6	23.3259	no	#REF!	7	3.14	negative	negative	7	4	1	1	2	13	2	0	0	0	0	0	0
no	1080	Female	64	61		2017-05-08		162.261	54.0123		no	#REF!	27	7.02	Positive	Positive	3	2	3	3	2	11	2	0.125	1	0	0	0	0
no	1081	Female	55	40		2005-03-08		163.444	56.4759		no	#REF!	11	2.98	negative	negative	0	0	0	0	0	0	0	0	0	0	0	0	0
no	1082	Female	56	46		2010-05-13		158.322	53.2617		no	#REF!	10	3.14	Positive	negative	7	0	2	2	2	11	2	0.25	1	0	0	0	0
no	1083	Female	38	34		2015-11-19		151.675	51.1767		no	#REF!	38	8.01	Positive	Positive	6	3	4	4	2	17	2	0.625	1	0	1	0	1
no	1084	Female	55	35		2000-01-01		159.317	69.9139		no	#REF!	67	24.8	negative	negative	9	5	4	4	2	22	3	1	1	0	0	0	0
no	1085	Female	66	54		2008-07-01		160.651	58.8143		no	#REF!	35	11.7	Positive	Positive	0	0	2	2	2	4	1	0.75	1	0	1	0	0
yes	1086	Female	69	58	43.7315	2009-10-01	1995-01-01	148.021	58.8638		no	#REF!	71	24.8	Positive	Positive	1	0	2	2	2	5	1	0	0	0	0	1	0
no	1087	Female	19	7		2008-05-21		160.062	62.1003		no	#REF!	40	35.5	negative	negative	1	1	7	7	3	16	2	1	1	1	0	0	0
no	1088	Female	24	16		2012-05-21		135.547	35.3342		no	#REF!	3	3.14	negative	negative	0	0	0	0	0	0	0	0	0	0	0	0	0
no	1089	Female	41	34		2013-05-29		161.279	50.266		no	#REF!	39	3.14	Positive	Positive	0	0	0	0	0	0	0	0	0	0	0	0	1
no	1090	Female	66	56		2010-05-01		157.811	43.7832		no	#REF!	36	6.75	negative	Positive	6	1	4	4	4	15	2	0.25	1	0	0	0	0
no	1091	Female	50	48		2017-12-10		156.308	46.5957		no	#REF!	58	13.5	Positive	Positive	12	6	4	4	4	26	3	1.5	1	1	0	0	1
no	1092	Female	40	26		2006-10-10		164.189	59.5907		no	#REF!	64	5.1	Positive	Positive	20	6	2	4	4	32	3	0.875	1	1	0	0	0
no	1093	Female	41	40		2019-07-17		171.741	57.198		no	#REF!	13	2.98	negative	Positive	4	1	2	2	4	9	1	0.125	1	0	0	0	0
no	1094	Female	73	45		1992-07-17		160	53.6	20.9375	no	#REF!	39	3.38	Positive	Positive	0	0	3	2	3	5	1	0.125	1	1	0	0	0
no	1095	Female	50	49		2019-06-17		152	58.7	25.4069	no	#REF!	60	31	Positive	negative	0	0	0	0	1	0	0	0	0	0	0	0	0
no	1096	Female	57	50		2013-05-17		152.929	54.6975		no	#REF!	55	14.6	Positive	Positive	2	0	2	2	1	6	1	0	0	0	0	1	1
no	1097	Female	60	57		2017-01-17		157.649	61.7558		no	#REF!	12	3.32	Positive	negative	0	0	0	0	0	0	0	0	0	0	0	0	0
no	1098	Female	67	62		2015-01-24		167.785	73.4798		no	#REF!	23	3.57	negative	negative	1	0	0	0	1	1	0	0	0	1	0	0	1
no	1099	Female	60	59		2019-07-30		165.217	57.4684		no	#REF!	15	2.98	negative	Positive	0	0	0	0	0	0	0	0	0	0	0	0	0
no	1100	Female	36	26		2011-01-13		156	66	27.1203	no	#REF!	26	3.11	negative	negative	3	4	4	3	3	14	2	0.25	1	0	1	1	0
no	1101	Female	76	73		2017-07-06		159.02	60.2441		no	#REF!	127	9.52	Positive	negative	1	0	1	1	1	3	1	1.25	1	0	0	0	0
no	1102	Female	79	67		2008-04-23		150.556	59.2422		no	#REF!	21	3.13	Positive	Positive	1	0	0	0	1	1	0	0.625	1	0	0	0	1
no	1103	Female	54	53		2020-01-22		150	51	22.6667	no	#REF!	100	32	Positive	Positive	2	2	3	3	3	10	2	0	0	0	1	0	1
no	1104	Female	68	62		2014-06-06		165.782	67.5145		no	#REF!	42	3.3	Positive	Positive	1	1	0	0	1	2	0	0	0	1	0	0	0
no	1105	Female	65	65		2021-03-09		143.827	55.3863		no	1	40	13.7	Positive	Positive	3	1	2	1	2	7	1	0.5	1	1	0	0	0
no	1106	Female	44	35		2012-05-25		153.408	63.3815		no	#REF!	68	4.34	Positive	negative	2	2	7	5	5	16	2	0.75	1	1	0	0	0
no	1107	Female	27	26		2020-05-21		163	48	18.0662	no	#REF!	65	25.7	Positive	Positive	11	9	8	8	7	36	3	2	1	1	1	0	1
no	1108	Female	58	57		2020-08-23		150	49	21.7778	no	#REF!	57	6.23	negative	negative	7	1	7	8	6	23	3	2	1	0	0	0	1
no	1109	Female	45	34		2010-07-16		152.308	40.3688		no	#REF!	20	3.13	Positive	Positive	1	0	1	1	1	3	1	0	0	0	0	0	0
no	1110	Female	78	78		2021-03-22		148	48	21.9138	no	#REF!	80	30.5	Positive	Positive	2	1	4	3	4	10	2	0.625	1	0	0	0	0
no	1111	Female	39	28		2010-04-01		155.54	42.0893		no	#REF!	15	3.13	negative	negative	1	0	3	3	4	7	1	0.125	1	0	0	0	0
no	1112	Female	45	43		2020-06-01		156	66.4	27.2847	no	#REF!	31	5.68	Positive	Positive	0	0	3	2	0	5	1	0	0	0	0	0	0
no	1113	Female	58	56		2019-09-06		168.316	52.9587		no	#REF!	55	4.76	Positive	Positive	2	10	6	6	8	24	3	0.625	1	0	0	1	0
no	1114	Female	58	43		2006-12-03		148.564	45.9461		no	#REF!	67	5.62	Positive	Positive	10	4	0	10	10	24	3	3	1	0	0	0	0
no	1115	Female	78	25		1969-01-01		137.845	54.0965		no	#REF!	110	12.1	negative	negative	6	2	8	8	8	24	3	1.875	1	0	0	0	1
no	1116	Female	65	58		2016-01-01		150	43.3	19.2444	no	#REF!	16	5	Positive	Positive	0	0	0	0	0	0	0	0	0	1	1	0	0
no	1117	Female	68	40		1995-01-01		151	52.9	23.2007	no	#REF!	27	3.3	Positive	Positive	1	0	4	3	2	8	1	0.625	1	0	0	0	0
no	1118	Female	36	35		2021-01-01		153	48.1	20.5477	no	#REF!	8	3.3	negative	Positive	0	0	1	1	0	2	0	0	0	0	0	0	0
no	1119	Female	40	29		2012-03-01		155	45.6	18.9802	no	#REF!	27	3.67	Positive	negative	1	0	2	2	2	5	1	0	0	0	0	0	0
no	1120	male	49.5342	48		2014-06-01		165	40.8	14.9862	yes	8.45902	60	31.8	Positive	Positive	15	8	4	4	5	31	3	2.5	1	0	0	0	0
no	1121	male	67.4411	66		2014-01-01		165	54.6	20.0551	yes	14.0328	3	3.28	Positive	Positive	0	0	0	0	0	0	0	0	0	0	0	0	0
no	1122	male	61.6411	51		2005-06-01		172	69.4	23.4586	yes	120.557	71	7.36	Positive	Positive	4	1	2	2	2	9	1	0.125	1	1	0	1	0
no	1123	male	48.8384	46		2013-06-04		160	43.8	17.1094	yes	25.9344	4	3.28	negative	negative	5	2	10	6	4	23	3	1.25	1	0	0	0	0
no	1124	male	54.5397	46		2007-08-01		162	70.1	26.7109	yes	96.0328	91	52.7	Positive	Positive	3	3	7	7	6	20	2	1	1	0	0	0	0
no	1125	male	59.3068	56		2012-07-19		162	48.7	18.5566	yes	37.082	37	3.28	Positive	Positive	0	0	3	3	2	6	1	0.125	1	0	0	1	0
no	1126	male	60.4712	59		2014-03-20		164	66.8	24.8364	no	17.1148	46	29.3	negative	negative	10	3	7	6	6	26	3	0.625	1	0	0	0	1
no	1127	male	41.5123	38		2012-06-01		167	69	24.7409	yes	38.6885	3	6.4	Positive	Positive	0	0	0	0	0	0	0	0	0	0	0	0	0
no	1128	male	65.8658	49		1999-08-01		168	64.7	22.9238	yes	192.393	69	26.1	Positive	Positive	8	4	7	7	7	26	3	1.125	1	0	0	0	0
no	1129	male	55.9781	51		2010-10-18		169	60	21.0077	yes	58.1311	77	68.2	Positive	Positive	8	8	2	2	2	20	2	0.75	1	1	0	0	0
no	1130	male	34.6384	28		2009-07-01		173	50.2	16.773	yes	73.8361	3	3.42	Positive	Positive	1	0	0	0	0	1	0	0	0	1	0	0	0
no	1131	male	51.7014	50		2014-09-01		165	59.4	21.8182	yes	12.459	25	16.7	Positive	Positive	11	11	7	6	4	35	3	0.75	1	1	0	0	1
no	1132	male	41.5397	39		2013-05-01		175	72.1	23.5429	no	28.4918	5	3.28	negative	negative	0	0	0	0	2	0	0	0	0	0	0	1	1
no	1133	male	47.1479	34		2003-01-20		180	92.2	28.4568	yes	151.705	45	51.1	negative	Positive	1	1	10	8	10	20	2	1.12	1	0	1	0	0
no	1134	male	64.737	62		2014-01-01		155	59.4	24.7242	yes	20.6885	45	8.39	Positive	Positive	2	1	5	5	4	13	2	0.38	1	0	0	0	1
no	1135	male	60.0767	59		2015-08-10		164	59.2	22.0107	yes	1.47541	36	12	Positive	Positive	0	0	5	4	2	9	1	0.375	1	0	0	0	0
no	1136	male	53.2301	52		2015-01-01		165	72.6	26.6667	yes	8.72131	65	53.8	Positive	Positive	6	6	8	8	6	28	3	0.625	1	0	0	0	1
no	1137	male	59.7589	47		2003-12-29		162	68.4	26.0631	yes	140.557	16	4.22	negative	negative	9	8	4	4	4	25	3	0.875	1	1	0	0	0
no	1138	male	61.1233	57		2011-10-12		168	61	21.6128	yes	47.4426	12	3.28	negative	negative	0	0	0	0	2	0	0	0	0	0	0	0	1
no	1139	male	60.2685	58		2013-10-12		172	62.8	21.2277	yes	23.5082	40	8.29	Positive	negative	1	0	0	0	0	1	0	0	0	0	0	0	0
no	1140	male	67.2247	66		2015-04-27		160	50.5	19.7266	yes	5.11475	32	22.9	Positive	Positive	3	1	6	6	4	16	2	0.375	1	1	0	0	0
no	1141	male	22.9616	20		2013-04-01		162	44.5	16.9563	no	30.1967	27	18.6	negative	negative	5	3	3	3	4	14	2	0.12	1	1	0	0	0
no	1142	male	44.326	36		2008-06-01		163	49	18.4425	yes	88.1639	15	3.28	Positive	Positive	4	4	6	6	4	20	2	0.38	1	0	0	0	0
no	1143	male	78.1726	73		2010-12-08		170	66.8	23.1142	yes	58	18	3.28	negative	negative	0	0	0	0	0	0	0	0	0	1	0	0	0
no	1144	male	68.3507	67		2014-12-01		170	50.8	17.5779	yes	10.3934	52	16.5	Positive	Positive	15	11	8	8	6	42	3	1.5	1	1	0	0	0
no	1145	male	18	10		2009-10-15		158	38.5	15.4222	yes	71.8361	52	61.5	Positive	negative	18	18	8	5	4	49	3	0.875	1	0	1	0	0
no	1146	male	70.0658	66		2012-04-01		168	47.4	16.7942	yes	42.3607	13	2.1	Positive	Positive	0	0	1	1	0	2	0	0	0	1	0	1	1
no	1147	male	61.0411	54		2009-05-23		168	60.9	21.5774	yes	76.7213	65	8.62	Positive	Positive	1	1	3	3	4	8	1	0	0	1	0	0	1
no	1148	male	51.1425	49		2013-10-22		176	67.4	21.7588	yes	23.9344	48	42.9	negative	Positive	0	0	8	6	6	14	2	0.25	1	0	0	0	0
no	1149	male	68.6356	38		1986-01-01		170	49.2	17.0242	yes	356.918	72	7.01	Positive	Positive	0	0	0	0	0	0	0	0	0	0	0	0	0
no	1150	male	70.6	58		2003-11-01		153	70.6	30.1593	yes	144.295	71	3.3	Positive	Positive	0	0	4	4	2	8	1	0.62	1	0	0	0	0
no	1151	male	56.3753	52		2012-05-23		162	46.8	17.8326	yes	41.9344	17	6.89	Positive	Positive	0	0	2	2	0	4	1	0.12	1	0	0	0	0
no	1152	male	62.3534	61		2015-01-01		175	57.9	18.9061	yes	10.7213	109	33.4	Positive	negative	4	0	4	4	4	12	2	0.38	1	0	0	0	0
no	1153	male	44.7644	41		2013-01-01		168	56.5	20.0184	yes	35.6721	136	30.7	Positive	Positive	7	7	6	6	4	26	3	1.25	1	0	0	0	0
no	1154	male	66.8356	66		2015-12-02		165	57.2	21.0101	yes	0.885246	62	5.38	Positive	Positive	5	4	5	5	4	19	2	0.375	1	1	0	0	0
no	1155	male	52.0548	47		2011-06-25		165	55.1	20.2388	yes	55.0164	100	62.7	Positive	negative	16	8	8	8	6	40	3	1.625	1	0	0	0	0
no	1156	male	61.1014	60		2015-10-01		168	71.9	25.4748	yes	4.52459	79	134	Positive	Positive	13	11	9	8	8	41	3	2.875	1	0	0	0	0
no	1157	male	48.2959	44		2012-03-01		162	59.9	22.8243	yes	48.1967	50	49.5	Positive	Positive	10	10	8	8	8	36	3	1.875	1	0	0	1	1
no	1158	male	44.6904	44		2016-01-01		170	68.4	23.6678	no	2.65574	62	30	negative	negative	3	1	1	1	4	6	1	0.125	1	0	0	0	0
no	1159	male	50.6795	49		2015-05-01		165	69.5	25.528	yes	12.7213	63	66.8	Positive	Positive	4	3	5	6	6	18	2	1.375	1	1	0	1	0
no	1160	male	67.2685	66		2016-03-01		160	49.3	19.2578	yes	3.77049	45	53.6	Positive	Positive	9	3	6	6	6	24	3	1	1	0	1	0	0
no	1161	male	59.3973	57		2014-05-01		165	63.3	23.2507	yes	26.4262	37	5.91	Positive	Positive	4	3	5	6	5	18	2	0.375	1	0	0	0	0
no	1162	male	66.9534	59		2009-03-01		166	70.6	25.6206	yes	88.2951	17	3.16	negative	negative	3	0	7	7	6	17	2	0.625	1	1	0	0	0
no	1163	male	52.0137	47		2012-04-17		172	72.8	24.6079	no	51.4754	25	4.32	Positive	Positive	0	0	0	0	2	0	0	0.125	1	1	1	1	0
no	1164	male	60.9863	58		2013-11-01		160	55.5	21.6797	yes	33.6393	16	3.16	Positive	Positive	0	0	0	0	0	0	0	0	0	0	0	0	0
no	1165	male	45.0822	34		2006-09-01		165	59.4	21.8182	yes	120.492	117	61.8	Positive	Positive	8	5	8	7	4	28	3	2.125	1	1	1	0	1
no	1166	male	56.2411	47		2008-05-01		175	77.9	25.4367	yes	101.115	8	3.16	Positive	Positive	0	0	0	0	0	0	0	0	0	1	0	1	0
no	1167	male	62.1068	61		2016-04-01		175	62	20.2449	yes	6.39344	130	84.8	Positive	Positive	15	14	10	10	10	49	3	3	1	1	0	1	1
no	1168	male	61.1918	58		2013-09-01		173	52	17.3745	yes	37.4754	5	3.16	Positive	Positive	1	0	2	2	2	5	1	0	0	1	0	0	0
no	1169	male	57.337	52		2012-05-01		161.877	44.819		yes	53.9016	104	30.5	Positive	negative	0	0	2	3	3	5	1	0.75	1	1	0	0	1
no	1170	male	58.0904	49		2008-07-11		169	49.3	17.2613	yes	101.377	138	173	Positive	Positive	8	11	8	8	9	35	3	2.25	1	0	0	0	0
no	1171	male	60.0959	52		2009-01-01		166	49.3	17.8908	yes	96	43	53.9	Positive	Positive	4	4	2	2	3	12	2	0.125	1	0	0	0	0
no	1172	male	54.3014	54		2017-01-01		181	60.4	18.4366	yes	0.754098	135	108	Positive	Positive	18	14	9	9	6	50	3	2.5	1	0	0	0	0
no	1173	male	63.7425	50		2004-01-01		163	44.5	16.7488	yes	157.213	6	3.11	negative	Positive	1	1	3	3	3	8	1	1	1	0	0	0	0
no	1174	male	68.1342	48		1997-03-01		171	71.4	24.4178	yes	239.672	6	3.11	Positive	Positive	1	1	2	2	2	6	1	0.5	1	0	0	0	0
no	1175	male	63.1726	59		2013-07-01		155	36.7	15.2758	yes	44.5574	110	74.7	Positive	Positive	0	0	0	0	0	0	0	0	0	0	0	0	0
no	1176	male	35.6301	31		2013-01-01		175	89.6	29.2571	yes	50.4918	32	43.5	Positive	Positive	23	12	9	9	8	53	3	1	1	0	0	0	0
no	1177	male	39.3014	37		2015-02-01		170	74	25.6055	yes	26.0984	1	3.11	negative	negative	0	6	6	6	6	18	2	0.875	1	0	0	0	1
no	1178	male	53.2849	50		2014-07-01		168	61.8	21.8963	yes	33.3443	34	7.57	Positive	Positive	1	1	6	6	8	14	2	1.5	1	0	0	0	0
no	1179	male	67.8411	66		2016-04-20		165	66.1	24.2792	yes	12	84	158	negative	Positive	9	14	6	6	4	35	3	2.25	1	0	0	0	0
no	1180	male	50.9205	49		2016-05-30		169	50.5	17.6815	yes	10.8197	80	3.02	Positive	Positive	1	1	2	2	4	6	1	0	0	0	1	1	0
no	1181	male	52.7315	50		2015-01-08		171	60.6	20.7243	yes	27.9672	21	26.4	Positive	Positive	2	2	6	6	6	16	2	0.75	1	1	1	1	1
no	1182	male	51.9178	43		2009-06-13		168	51.1	18.1052	yes	96.0984	59	62.7	Positive	Positive	21	21	6	6	6	54	3	1.125	1	0	1	0	0
no	1183	male	64.6411	54		2007-09-01		170	54.1	18.7197	yes	117.672	71	43.4	Positive	Positive	15	12	9	9	8	45	3	1.875	1	0	0	0	1
no	1184	male	41.1562	40		2016-12-01		162	42.5	16.1942	yes	8.7541	116	49.3	Positive	Positive	6	5	9	7	2	27	3	0.625	1	1	0	0	1
no	1185	male	57.4767	53		2013-08-01		160	62.6	24.4531	yes	49.5082	27	3.02	Positive	Positive	2	0	0	0	2	2	0	0	0	0	0	0	0
no	1186	male	60.474	59		2017-03-01		172	65.2	22.0389	yes	6.81967	120	83.6	Positive	Positive	14	10	4	4	4	32	3	1.875	1	0	0	0	0
no	1187	male	45.4301	44		2016-08-27		173	78.2	26.1285	yes	13.0492	60	3.12	Positive	Positive	0	0	3	3	1	6	1	0.625	1	1	1	1	0
no	1188	male	18.2822	12		2012-07-01		173	47.1	15.7372	no	63.4754	28	14.2	negative	negative	2	2	1	1	2	6	1	0	0	1	1	0	0
no	1189	male	35.989	31		2013-05-20		170	63.4	21.9377	no	52.8852	19	5.74	negative	negative	0	0	3	3	0	6	1	0.25	1	1	0	0	0
no	1190	male	62.2986	61		2017-06-01		180	80	24.6914	yes	4.72131	52	37.9	Positive	Positive	8	8	9	8	9	33	3	1.75	1	1	0	0	0
no	1191	male	46.4932	43		2014-07-04		171	72.6	24.8282	yes	39.5738	26	27.4	Positive	Positive	3	1	4	3	5	11	2	0	0	0	0	0	0
no	1192	male	63.2603	61		2016-01-01		160	58.2	22.7344	yes	21.7049	25	31.4	Positive	negative	0	0	3	3	0	6	1	0	0	0	0	0	0
no	1193	male	44.274	43		2017-05-01		167	52.9	18.9681	yes	5.86885	70	64.5	Positive	Positive	15	11	7	7	4	40	3	1.75	1	0	0	0	0
no	1194	male	64.8658	60		2013-06-10		162	52.8	20.1189	yes	53.541	26	3.13	Positive	Positive	1	0	2	2	2	5	1	0.125	1	0	0	0	0
no	1195	male	66.2438	43		1994-10-14		165	70.3	25.8219	yes	277.016	40	3.67	negative	negative	0	1	3	3	0	7	1	0.25	1	0	0	0	0
no	1196	male	47.2164	46		2017-05-01		168	75.1	26.6086	no	7.37705	45	4.77	negative	Positive	0	0	0	0	0	0	0	0	0	1	0	0	0
no	1197	male	38.9178	17		1996-11-01		170	72.9	25.2249	no	253.279	27	3.13	Positive	negative	0	0	2	2	0	4	1	0	0	0	0	0	0
no	1198	male	69.6356	61		2010-01-01		170	80.4	27.8201	yes	95.8689	15	3.15	Positive	Positive	1	0	0	0	2	1	0	0.25	1	1	0	0	0
no	1199	male	50.5507	35		2003-03-11		160	61.7	24.1016	no	177.672	23	3.13	Positive	Positive	2	1	0	0	2	3	1	0	0	0	0	0	0
no	1200	male	54.863	46		2010-01-01		172	70.1	23.6952	yes	96.5902	27	3.13	Positive	Positive	3	2	4	4	2	13	2	0.125	1	1	0	0	0
no	1201	male	62.7041	58		2014-03-13		161	48.8	18.8264	yes	46.5246	4	3.13	Positive	Positive	0	0	0	0	0	0	0	0	0	0	0	0	0
no	1202	male	60.389	51		2009-02-05		168	59	20.9042	no	107.803	2	4.16	Positive	Positive	0	0	0	0	1	0	0	0	0	1	0	0	0
no	1203	male	59.6932	54		2012-08-19		164	58.9	21.8992	no	65.5082	8	5.41	Positive	Positive	13	8	2	2	3	25	3	0	0	0	0	0	0
no	1204	male	40.6959	38		2016-05-01		165	59.9	22.0018	yes	22.3934	16	3.13	Positive	Positive	0	0	5	3	0	8	1	0	0	0	0	0	1
no	1205	male	53.9041	52		2017-03-01		176.005	48.1	15.5273	yes	12.4262	45	72.4	Positive	negative	20	18	10	10	10	58	3	1.25	1	1	0	0	0
no	1206	male	66.0219	65		2017-10-01		162	61.6	23.472	yes	5.40984	19	3.13	Positive	Positive	12	8	6	6	2	32	3	0.375	1	0	0	0	0
no	1207	male	65.9616	62		2014-05-01		153	38.8	16.5748	yes	46.5902	30	7.83	Positive	Positive	0	1	0	0	0	1	0	0	0	0	0	0	0
no	1208	male	61.6	51		2008-04-13		158	64.2	25.717	yes	119.213	9	3.14	Positive	Positive	0	0	0	0	0	0	0	0	0	1	0	0	0
no	1209	male	39.6932	39		2017-11-01		172	73.5	24.8445	yes	5.01639	51	43.5	Positive	Positive	9	7	8	8	6	32	3	1.625	1	1	0	0	0
no	1210	male	48.4219	42		2012-05-03		173	56.4	18.8446	yes	71.8361	39	3.14	Positive	Positive	2	1	0	0	2	3	1	0	0	1	0	0	0
no	1211	male	29.5507	28		2017-10-01		170	61	21.1073	yes	7.08197	2	3.14	Positive	Positive	0	0	0	0	0	0	0	0	0	0	0	0	0
no	1212	male	53.863	42		2007-06-01		170	60.6	20.9689	yes	131.869	26	3.85	Positive	Positive	4	4	5	5	5	18	2	0.875	1	0	1	0	0
no	1213	male	52.1671	51		2017-09-01		173	68.2	22.7873	yes	9.14754	60	11.5	Positive	Positive	5	5	4	4	4	18	2	0.25	1	0	0	0	0
no	1214	male	24.2849	23		2017-05-01		164	46.4	17.2516	yes	13.1803	3	6.76	negative	Positive	2	1	3	3	3	9	1	0.125	1	0	0	0	0
no	1215	male	35.6767	28		2010-11-04		168	59.6	21.1168	yes	91.0164	38	8.58	Positive	Positive	0	2	8	6	6	16	2	0.375	1	0	0	0	1
no	1216	male	65.1096	57		2010-06-21		178	62.7	19.7892	yes	95.8033	53	3.55	Positive	Positive	2	2	3	3	2	10	2	0	0	1	0	0	1
no	1217	male	63.5288	57		2012-02-01		170	84.5	29.2388	no	76.5902	6	3.23	Positive	Positive	2	0	1	1	2	4	1	0.125	1	0	0	0	0
no	1218	male	65.126	63		2017-01-01		160	50.1	19.5703	yes	17.9344	33	7.89	Positive	Positive	0	0	5	5	0	10	2	0.125	1	1	0	1	0
no	1219	male	49.9288	49		2018-02-01		165	54.6	20.0551	yes	4.98361	10	3.23	Positive	Positive	1	2	2	2	2	7	1	0	0	0	0	0	0
no	1220	male	45.1699	42		2016-03-18		170	71.7	24.8097	yes	27.8689	26	3.72	Positive	negative	0	0	3	3	2	6	1	0	0	0	0	0	1
no	1221	male	56.7863	53		2015-10-01		168	63.8	22.6049	yes	33.9672	11	3.23	Positive	Positive	0	0	0	0	0	0	0	0	0	1	1	1	1
no	1222	male	60.4055	49		2007-12-01		170	57.1	19.7578	yes	128.131	38	3.23	Positive	Positive	3	0	1	1	0	5	1	0	0	1	1	1	0
no	1223	male	62.4356	62		2018-09-18		164	47.6	17.6978	yes	1	106	72.3	Positive	negative	7	5	6	6	6	24	3	0.5	1	0	0	0	0
no	1224	male	61.9836	60		2017-08-01		162	61.5	23.4339	no	14.459	18	5.3	negative	Positive	1	0	0	0	1	1	0	0	0	0	0	0	0
no	1225	male	71.3808	64		2011-10-25		165	73.2	26.8871	yes	85.1475	12	5.82	negative	negative	0	0	2	2	0	4	1	0	0	1	0	0	0
no	1226	male	61.263	54		2012-06-01		168	64	22.6757	yes	78.2295	22	3.23	Positive	Positive	0	0	0	0	0	0	0	0	0	0	0	0	1
no	1227	male	49.4466	49		2019-01-12		163	65.4	24.6152	yes	1	115	67.4	Positive	Positive	19	19	4	5	7	47	3	1.125	1	0	0	0	0
no	1228	male	31.3973	29		2016-09-11		169	71.2	24.9291	no	28.2623	13	7.46	negative	negative	0	0	0	0	0	0	0	0	0	0	0	0	0
no	1229	male	52.674	48		2014-09-01		160	50.5	19.7266	yes	53.7377	35	25.1	Positive	Positive	0	1	0	0	0	1	0	0	0	1	1	0	0
no	1230	male	19.2795	8		2008-01-01		182	107.9	32.5746	no	133.902	20	8.35	negative	negative	1	1	2	2	3	6	1	0.125	1	1	0	0	0
yes	1231	male	50.6932	31	45.0055	2000-01-30	2013-07-01	177	67	21.3859	yes	228.754	3	3.13	Positive	Positive	0	0	0	0	0	0	0	0	0	0	0	0	0
no	1232	male	64.074	53		2009-04-01		160	55.4	21.6406	yes	120.656	93	47	Positive	Positive	11	2	8	8	4	29	3	2.625	1	1	0	1	0
no	1233	male	61.7863	60		2018-03-01		168	63.1	22.3569	yes	14.2951	131	92.8	Positive	Positive	12	11	8	8	5	39	3	2	1	0	0	0	0
no	1234	male	70.463	69		2018-03-19		159	58.3	23.0608	no	14.2623	85	5.41	Positive	Positive	7	1	3	3	2	14	2	0	0	1	0	0	0
no	1235	male	69.6986	69		2018-12-01		165	62	22.7732	yes	5.90164	95	58	Positive	Positive	6	7	8	8	8	29	3	2.5	1	1	0	0	0
no	1236	male	70.5945	70		2019-02-01		170	65.1	22.526	yes	4	123	127	Positive	Positive	15	14	7	7	7	43	3	2	1	0	0	0	0
no	1237	male	34.4959	29		2014-01-01		164	55	20.4491	yes	64.8852	2	3.13	Positive	Positive	0	0	0	0	0	0	0	0	0	0	0	0	0
no	1238	male	54.5534	52		2017-06-01		165	58.2	21.3774	no	24.7213	29	115	negative	negative	23	22	7	7	4	59	3	1	1	0	0	0	0
no	1239	male	71.7315	71		2018-12-01		163.005	57.8	21.7533	yes	6.7541	20	4.47	Positive	Positive	0	1	0	0	0	1	0	0	0	1	0	1	1
no	1240	male	54.7616	52		2017-07-01		169	49.1	17.1913	yes	24.918	68	136	Positive	Positive	11	9	4	4	7	28	3	1.375	1	1	0	0	0
no	1241	male	44.9753	44		2018-10-14		170	58.8	20.346	yes	10.1639	10	3.11	negative	Positive	22	0	5	4	2	31	3	0	0	0	0	0	0
no	1242	male	62.0274	51		2008-11-01		168.005	63.2	22.391	yes	129.311	23	3.11	Positive	Positive	0	0	0	0	0	0	0	0	0	1	0	0	0
no	1243	male	53.6986	53		2019-04-15		165	62	22.7732	yes	4.29508	44	40	Positive	Positive	5	1	4	3	3	13	2	0.5	1	0	0	0	0
no	1244	male	57.3973	56		2019-04-05		170.005	58.6	20.2756	yes	4.98361	92	102	Positive	Positive	17	11	9	8	6	45	3	1.25	1	0	0	1	1
no	1245	male	55.2822	52		2016-10-01		168	53.2	18.8492	no	35.1148	6	3.11	Positive	negative	0	0	5	3	7	8	1	0.125	1	0	0	0	0
no	1246	male	55.9699	55		2018-12-01		163.005	61.7	23.2211	yes	9.93443	14	3.14	Positive	negative	0	0	1	1	0	2	0	0	0	0	0	0	0
no	1247	male	68.3397	66		2018-07-01		165	67.3	24.7199	yes	17.2131	19	39.3	negative	negative	0	0	0	0	1	0	0	0	0	0	0	0	0
no	1248	male	64.4904	63		2019-06-01		160	59.2	23.125	no	6.81967	53	40.1	Positive	Positive	12	3	6	5	2	26	3	1.125	1	0	0	0	0
no	1249	male	65.5863	63		2018-01-01		164	48.6	18.0696	yes	23.8689	50	6.9	Positive	Positive	2	2	4	4	4	12	2	0.125	1	0	0	0	0
no	1250	male	48.0575	46		2018-05-29		167	64.3	23.0557	yes	23.4754	61	43.3	Positive	negative	7	7	6	6	4	26	3	1.5	1	0	0	0	1
no	1251	male	62.0438	54		2013-01-01		161	71	27.3909	no	88.3607	40	22.8	negative	Positive	6	5	9	9	7	29	3	2.125	1	1	0	0	0
no	1252	male	56.4767	56		2019-12-31		166	59.4	21.5561	no	4.59016	17	3.14	Positive	negative	1	1	2	2	2	6	1	0.5	1	0	0	0	0
no	1253	male	63.2384	60		2017-05-01		158	52.3	20.9502	yes	36.8525	111	17.7	Positive	Positive	18	4	5	5	5	32	3	1.125	1	0	0	0	0
no	1254	male	61.2466	54		2013-10-31		165	60.3	22.1488	yes	79.4754	118	100	Positive	Positive	7	7	8	8	8	30	3	2	1	0	0	0	0
no	1255	male	68.3068	37		1990-01-01		160	70.9	27.6953	yes	364.918	113	22.6	Positive	negative	14	6	7	7	7	34	3	2.375	1	0	0	0	0
no	1256	male	70.6712	55		2005-06-30		173	78.2	26.1285	yes	179.443	85	3.11	negative	Positive	3	2	7	7	5	19	2	1.875	1	0	1	0	0
no	1257	male	18	16		2020-04-11		170	44.9	15.5363	yes	2.4918	122	65.3	Positive	negative	3	3	4	4	4	14	2	1.125	1	0	0	0	0
no	1258	male	57.2384	37		2000-07-31		170	60.7	21.0035	yes	238.426	13	3.11	Positive	negative	0	0	4	2	0	6	1	0	0	0	0	1	1
no	1259	male	32.7753	32		2019-11-01		175	62.1	20.2776	yes	7.86885	20	3.11	negative	negative	16	15	8	8	8	47	3	1.75	1	0	0	0	0
no	1260	male	46.3041	45		2019-04-12		167	65.1	23.3425	yes	15.1803	37	21	negative	negative	0	0	4	4	2	8	1	1.125	1	0	0	0	0
no	1261	male	62.8877	62		2020-03-20		168	59.1	20.9396	no	4.09836	36	6.23	Positive	Positive	11	4	4	4	3	23	3	0	0	1	0	0	1
no	1262	male	74.9068	72		2018-06-15		162	52.3	19.9284	no	25.2459	35	7.29	negative	negative	26	26	5	5	2	62	3	1.5	1	0	0	0	0
no	1263	male	41.9836	41		2020-02-02		168	48.6	17.2194	yes	6.4918	54	65.6	Positive	negative	18	18	7	7	8	50	3	2.625	1	1	1	0	1
no	1264	male	63.9096	62		2019-08-27		168	55.6	19.6995	yes	11.9016	32	5.04	Positive	Positive	2	2	4	4	4	12	2	0.375	1	0	0	0	0
no	1265	male	65.189	63		2019-01-14		170	76.8	26.5744	yes	19.4426	123	139	Positive	Positive	12	24	8	8	8	52	3	2.875	1	1	1	0	0
no	1266	male	57.6712	45		2008-05-23		165	71	26.079	yes	147.311	126	92.4	Positive	Positive	3	3	2	2	4	10	2	0.875	1	1	1	0	1
no	1267	male	64.6274	46		2002-10-14		161	52.3	20.1767	yes	214.852	17	2.98	Positive	negative	0	0	0	0	0	0	0	0	0	0	0	0	0
yes	1268	male	52.2767	44	33.937	2012-09-27	2002-07-01	181.005	84.1	25.6693	no	96.8197	21	6.55	Positive	negative	0	0	0	0	0	0	0	0	0	1	0	0	1
no	1269	male	72.1753	71		2019-11-11		162	45.7	17.4135	yes	11.9016	115	66.1	Positive	negative	0	0	0	0	0	0	0	0	0	0	0	0	1
no	1270	male	33.5753	33		2020-08-09		177	70.6	22.535	yes	3.47541	84	49	Positive	Positive	3	4	6	6	6	19	2	0.5	1	0	0	0	0
no	1271	male	70.9014	67		2017-03-01		162	53.1	20.2332	yes	45.1475	7	9.29	Positive	Positive	0	0	2	2	2	4	1	0.375	1	0	0	0	0
no	1272	male	56.3726	35		2000-01-01		160	59.4	23.2031	no	250.721	24	5.06	Positive	Positive	0	0	1	1	1	2	0	0	0	0	0	0	0
no	1273	male	58.9288	58		2020-09-30		170	52.3	18.0969	yes	2.91803	43	22.5	Positive	Positive	9	5	4	6	4	24	3	1.5	1	0	0	0	0
no	1274	male	50.5342	50		2020-11-01		172	66.6	22.5122	yes	2.65574	103	263	Positive	Positive	6	4	8	8	6	26	3	2.125	1	0	0	0	0
no	1275	male	65.5315	55		2011-02-01		161	68.6	26.465	yes	120.492	33	5.59	Positive	Positive	6	1	3	3	3	13	2	1.125	1	0	0	0	0
no	1276	male	58.8658	58		2020-05-01		170	53.7	18.5813	yes	9.80328	78	84.5	Positive	Positive	4	2	10	5	6	21	2	0.875	1	0	1	0	1
no	1277	male	53.8192	50		2018-03-31		165	66.2	24.3159	yes	34.8197	46	3.3	Positive	Positive	14	10	7	7	5	38	3	0.125	1	0	0	0	1
no	1278	male	65.7726	65		2020-08-31		172	62.4	21.0925	no	6	22	91.3	Positive	Positive	2	0	2	2	2	6	1	0.125	1	1	0	0	0
no	1279	male	58.3068	47		2010-04-01		165	69.6	25.5647	no	131.213	17	11.9	Positive	Positive	3	3	6	5	4	17	2	0.375	1	1	1	0	1
no	1280	male	72.3945	31		1980-04-30		163	64.8	24.3893	no	489.541	14	3.3	Positive	negative	0	0	4	2	0	6	1	1.375	1	0	1	1	0
no	1281	male	69.4548	66		2018-03-29		170	56.7	19.6194	yes	35.541	16	9.58	negative	negative	0	0	5	5	0	10	2	0.25	1	0	0	0	0
no	1282	male	42.0877	41		2021-01-31		165	50.8	18.6593	yes	1.90164	136	64.2	Positive	Positive	15	18	5	5	5	43	3	0.75	1	1	0	0	1
no	1283	male	71.6877	61		2011-07-05		160	54.1	21.1328	yes	116.623	37	14.7	Positive	Positive	2	1	5	5	3	13	2	1.25	1	0	0	0	0
no	1284	male	48.1781	46		2019-10-01		167	69.1	24.7768	no	18.1311	56	22.7	negative	Positive	5	5	8	8	8	26	3	0.125	1	1	1	1	0
no	1285	male	58.0356	51		2015-02-15		170	55.8	19.308	yes	73.6066	62	51.4	Positive	Positive	0	0	6	6	0	12	2	0.5	1	0	0	0	0
no	1286	male	41.2849	11		1992-01-01		168	48.1	17.0422	no	350.656	31	15.8	Positive	Positive	0	4	0	0	0	4	1	0	0	0	0	0	0
no	1287	male	68.9205	67		2019-08-13		160	45.9	17.9297	yes	20.0656	100	18	Positive	Positive	13	8	7	7	7	35	3	1.625	1	0	0	0	0
no	1288	male	48.4329	45		2018-09-19		161	63.2	24.3818	no	31.0164	12	3.3	negative	negative	6	6	1	1	2	14	2	0.125	1	0	0	0	1
no	1289	male	37.4712	35		2019-11-01		175	73.7	24.0653	yes	19.8689	8	8.19	Positive	negative	14	2	5	6	4	27	3	0.125	1	1	1	1	1
no	1290	male	59.1096	58		2021-03-01		170	62.9	21.7647	no	4.45902	128	139	Positive	negative	2	0	3	3	2	8	1	0.375	1	0	0	0	0
no	1291	male	53.8575	49		2016-10-22		162	47.5	18.0994	no	56.6557	31	3.13	Positive	Positive	6	6	5	6	4	23	3	0.5	1	0	1	0	0
no	1292	male	59.8767	43		2005-07-16		169	60	21.0077	no	191.967	32	4.53	Positive	Positive	0	0	2	2	1	4	1	0.125	1	0	0	0	0
no	1293	male	71.7534	69		2019-01-01		170	69.9	24.1869	yes	31.1803	70	21.1	Positive	Positive	1	1	3	3	3	8	1	0.625	1	0	0	0	1
no	1294	male	57.7945	47		2011-10-01		172	47.5	16.056	yes	118.754	59	14.3	Positive	Positive	3	2	3	3	4	11	2	0.75	1	1	0	0	0
no	1295	male	42.0192	41		2021-08-18		180	59.9	18.4877	yes	1	103	93.8	negative	negative	2	0	5	5	4	12	2	0.875	1	0	0	0	0
no	1296	male	56.8493	54		2019-01-12		170	67.1	23.218	yes	31.5738	12	4.69	Positive	Positive	0	0	3	2	0	5	1	0	0	0	0	0	0
no	1297	male	37.4795	32		2016-07-01		179	69.2	21.5973	no	61.9672	9	3.17	negative	negative	0	1	3	1	0	5	1	0	0	1	0	0	1
no	1298	male	61.9123	56		2016-11-03		168	65.3	23.1363	yes	59.1475	80	11	Positive	Positive	15	15	6	7	8	43	3	2	1	0	0	0	1
no	1299	male	72.4411	54		2003-12-17		170	75.3	26.0554	yes	213.443	16	12.3	Positive	Positive	9	6	7	7	3	29	3	1.25	1	0	1	0	0
no	1300	male	65.3753	64		2021-06-01		165	60.4	22.1855	yes	5.01639	134	15.5	Positive	Positive	8	3	10	10	8	31	3	2.625	1	0	0	0	1
no	1301	male	36.0932	28		2014-05-26		160	47.6	18.5938	no	89.1475	11	2.86	negative	negative	2	2	5	5	4	14	2	0.25	1	0	0	0	0
no	1302	male	58.4575	54		2018-05-01		165	64.5	23.6915	yes	42.1967	50	5.81	Positive	Positive	5	5	6	8	6	24	3	2	1	1	0	0	0
no	1303	male	58.4466	56		2020-03-10		168	51.5	18.2469	yes	20.2951	111	43.4	Positive	Positive	7	4	6	6	2	23	3	1	1	0	0	0	0
no	1304	male	53.4548	52		2020-09-10		162	48.7	18.5566	yes	14.4918	48	15.6	Positive	Positive	1	1	3	3	4	8	1	0	0	0	0	0	0
no	1305	male	62.7096	54		2014-01-01		160	49.2	19.2188	yes	95.0164	118	55.7	negative	Positive	5	5	5	5	5	20	2	0.5	1	0	0	0	0
no	1306	male	60.5616	59		2013-08-01		157	55	22.3133	no	9.18033	32	13.2	negative	Positive	3	3	1	1	2	8	1	0.25	1	1	0	0	0
no	1307	male	50.6548	49		2013-09-01		156.364	56.0624		yes	14.5246	145	103	Positive	Positive	13	0	2	2	3	17	2	0.125	1	0	0	0	0
no	1308	male	51.2247	50		2014-07-01		165	55	20.202	yes	5.96721	49	70.6	Positive	Positive	14	6	6	5	6	31	3	0.25	1	0	0	0	0
no	1309	male	60.7178	59		2013-12-01		156.707	58.5848		yes	15.7049	20	3.58	Positive	Positive	1	0	1	1	1	3	1	0.125	1	1	0	0	1
no	1310	male	53.1945	45		2008-07-01		148.593	50.6513		no	87.7377	2	3.28	negative	negative	8	4	3	3	2	18	2	0	0	0	0	0	0
no	1311	male	52.4192	44		2008-03-01		156.119	56.1524		yes	96.0328	32	80.6	Positive	Positive	2	2	9	2	7	15	2	1.125	1	1	0	0	0
no	1312	male	80.6247	69		2005-04-01		150.461	45.7096		yes	132.164	80	36.7	Positive	Positive	0	0	9	7	4	16	2	1.5	1	0	0	0	0
no	1313	male	46.3507	44		2014-04-01		160.812	65.1492		yes	24.5902	39	4.54	Positive	Positive	12	10	3	3	3	28	3	0.125	1	0	0	0	1
no	1314	male	62.0247	57		2012-04-01		168.883	47.7904		no	48.6885	29	3.3	Positive	Positive	0	1	4	1	0	6	1	0.25	1	1	0	0	0
no	1315	male	66.6822	65		2015-08-01		162	45	17.1468	no	8.85246	133	75.9	Positive	Positive	22	17	8	8	8	55	3	2.625	1	1	1	1	1
no	1316	male	49.0027	46		2014-04-01		161.761	59.0135		no	24.8197	49	3.51	Positive	Positive	12	10	4	4	4	30	3	0.625	1	1	0	0	0
no	1317	male	49.1589	47		2015-01-01		156.4	73.2547		yes	15.8689	46	44.8	Positive	Positive	6	6	5	5	4	22	3	0	0	0	0	0	0
no	1318	male	71.2822	70		2015-09-01		152.606	39.668		no	8.09836	7	0.65	Positive	negative	1	1	5	5	4	12	2	0.125	1	1	0	1	0
no	1319	male	66.4548	65		2015-05-01		151.888	40.1576		yes	12.5574	123	46.1	Positive	Positive	16	16	7	7	7	46	3	2.625	1	0	0	0	0
no	1320	male	64.6548	42		1994-01-01		140.574	48.2251		no	269.377	99	129	Positive	Positive	3	3	7	7	8	20	2	2.375	1	0	0	0	0
no	1321	male	68.9863	67		2015-08-01		148.308	56.6746		no	12.1311	37	3.16	Positive	Positive	9	3	6	6	6	24	3	1	1	0	0	0	0
no	1322	male	57.4384	51		2010-12-01		152.481	59.4551		yes	68.1967	27	6.37	Positive	Positive	0	0	2	2	2	4	1	0.125	1	0	1	0	1
no	1323	male	78.3123	72		2010-08-01		149.831	33.6528		yes	72.459	85	66.7	Positive	Positive	20	20	8	8	8	56	3	1.875	1	0	0	0	0
no	1324	male	75.6055	71		2012-09-01		161.788	47.7582		no	48.0328	11	28.5	negative	negative	2	8	4	4	4	18	2	1.25	1	0	0	0	0
no	1325	male	59.7753	58		2015-09-01		155.364	54.8295		no	12.7213	112	103	Positive	Positive	10	7	4	4	4	25	3	0.5	1	0	0	0	0
no	1326	male	53.2849	36		2000-04-26		160.623	42.6638		yes	197.869	117	233	Positive	Positive	6	5	10	10	8	31	3	2.75	1	0	0	0	0
no	1327	male	66.7781	61		2011-11-01		165.667	50.4334		no	60.0984	38	15.9	Positive	Positive	15	8	7	6	6	36	3	1.125	1	0	0	0	0
no	1328	male	48.3808	44		2013-01-01		160.762	63.8462		no	49.4098	105	85.9	Positive	Positive	14	8	7	7	4	36	3	1.625	1	1	1	1	1
no	1329	male	53.6192	53		2017-02-09		174	79.6	26.2915	yes	2.95082	20	6.63	Positive	Positive	5	5	5	5	8	20	2	0.875	1	1	1	0	1
no	1330	male	64.5096	54		2007-05-01		155.153	46.3405		no	120.656	35	52.4	Positive	negative	20	20	6	6	6	52	3	1.875	1	0	0	0	0
no	1331	male	61.2466	47		2003-06-01		163.212	60.7246		yes	168.361	56	24.1	Positive	Positive	20	20	4	4	4	48	3	1.375	1	0	1	0	1
no	1332	male	67.3534	66		2016-10-01		164.515	70.1864		yes	10.2623	20	3.78	Positive	Positive	1	1	0	0	2	2	0	0.125	1	1	0	0	0
no	1333	male	38.0932	32		2011-09-01		154.099	42.7466		no	72.2623	85	172	negative	negative	3	0	5	2	2	10	2	0.5	1	0	0	0	1
no	1334	male	55.1123	53		2016-07-07		157.917	66.2519		yes	14.7541	31	21.8	Positive	Positive	2	2	4	4	4	12	2	0	0	0	0	0	0
no	1335	male	39.9644	38		2016-10-14		166.848	65.0117		yes	11.8033	22	30.4	Positive	Positive	3	3	5	5	4	16	2	0.375	1	0	1	0	1
no	1336	male	51.3671	47		2013-11-10		170	68.2	23.5986	yes	47.2131	5	3.14	negative	negative	2	2	2	2	2	8	1	0	0	0	0	0	1
yes	1337	male	65.2712	63	61.2795	2015-11-27	2014-01-01	147.016	66.3341		yes	24.9836	27	7.81	Positive	Positive	1	0	4	4	2	9	1	0.25	1	0	0	0	0
no	1338	male	66.863	56		2008-03-11		162.427	64.6308		yes	118.033	36	3.13	Positive	Positive	0	0	2	2	1	4	1	0.125	1	1	0	0	1
no	1339	male	60.5753	52		2010-03-01		164.407	64.2325		no	96	23	3.13	Positive	Positive	17	3	2	2	2	24	3	0.75	1	0	0	0	1
no	1340	male	74.4247	67		2011-06-01		172.764	64.8769		yes	82.6885	31	5.83	negative	negative	22	7	10	10	10	49	3	3	1	0	0	0	0
no	1341	male	23.789	12		2007-02-01		160.03	71.1554		no	134.557	14	3.14	negative	negative	0	0	0	0	0	0	0	0	0	0	0	0	0
no	1342	male	62.4356	55		2011-04-01		156.937	54.2353		yes	84.7213	104	70.6	Positive	Positive	2	22	8	8	4	40	3	0.75	1	0	0	0	1
no	1343	male	53.6247	53		2018-03-01		160	49	19.1406	yes	2.91803	75	47.7	Positive	Positive	4	12	4	4	4	24	3	0.375	1	0	0	0	0
no	1344	male	66.6822	64		2015-12-01		148.316	37.5506		yes	29.8689	50	7.89	Positive	Positive	5	7	3	3	3	18	2	0	0	1	0	0	0
no	1345	male	37.7123	36		2017-01-04		160.803	63.7969		no	17.7049	4	3.23	negative	Positive	1	0	1	1	2	3	1	0	0	0	0	0	1
no	1346	male	62.2384	60		2016-07-19		158.986	51.4923		no	23.6066	85	13.3	Positive	Positive	0	0	5	4	7	9	1	0	0	0	0	0	0
no	1347	male	42.2822	41		2017-07-01		169.202	44.6782		yes	12.8197	72	110	negative	negative	5	6	5	5	4	21	2	0.125	1	0	0	0	1
no	1348	male	45.2603	39		2012-08-28		158.723	59.5641		yes	70.8197	32	19	Positive	Positive	1	1	5	5	5	12	2	0.125	1	1	0	1	1
no	1349	male	32.8685	31		2017-07-06		156.352	37.4014		no	12.7869	75	44.2	Positive	Positive	13	9	6	6	6	34	3	0.675	1	0	0	0	0
no	1350	male	53.8274	50		2015-07-18		159.548	56.7241		no	36.3934	30	18.8	Positive	Positive	1	1	6	6	4	14	2	0.25	1	0	0	0	0
no	1351	male	31.8959	30		2017-03-28		159.958	45.3831		yes	16.7213	9	4.67	Positive	negative	0	0	5	5	4	10	2	0	0	0	0	0	1
no	1352	male	73.9671	70		2015-09-09		159.126	50.6077		yes	35.4098	137	65.2	Positive	Positive	10	7	9	9	8	35	3	1.625	1	0	0	1	0
no	1353	male	53.8712	53		2018-07-07		173	71	23.7228	yes	1.96721	110	75.4	negative	negative	5	5	5	5	4	20	2	0.625	1	1	0	1	1
no	1354	male	58.2959	56		2017-01-01		166.34	70.3424		yes	20.5246	51	33.8	Positive	Positive	1	3	4	4	4	12	2	0.25	1	0	0	0	0
no	1355	male	47.1123	45		2016-12-06		161.752	49.7278		yes	23.6066	110	73.2	Positive	Positive	27	25	10	10	10	72	3	1.625	1	1	0	0	0
no	1356	male	56.7425	55		2018-03-01		165	46	16.8962	yes	10.7213	5	3.13	Positive	Positive	2	0	3	3	2	8	1	0.125	1	0	0	0	0
no	1357	male	70.811	69		2018-04-22		154.455	56.387		no	15.4754	7	3.08	negative	negative	9	2	6	6	4	23	3	0.75	1	0	0	0	1
no	1358	male	59.2986	58		2019-07-12		163	63.5	23.9	yes	3.40984	92	79.1	Positive	Positive	10	7	10	8	8	35	3	1.625	1	0	0	0	0
no	1359	male	62.7233	61		2019-05-01		175	84	27.4286	no	8.45902	143	131	negative	Positive	14	10	10	9	5	43	3	2.5	1	0	0	0	1
no	1360	male	44.5726	10		1986-01-08		160.993	48.6113		no	409.902	28	7.28	negative	Positive	1	1	3	3	5	8	1	0	0	0	0	0	0
no	1361	male	63.8329	55		2012-05-20		136.762	33.1072		yes	94.6557	23	25.7	negative	negative	0	0	2	2	0	4	1	2.25	1	0	0	0	0
no	1362	male	60.9342	57		2017-02-15		155.079	61.3084		no	38.1311	24	17	Positive	Positive	2	4	3	3	3	12	2	0.375	1	0	0	0	0
no	1363	male	74.3014	71		2018-04-25		152.961	61.41		yes	35.7705	67	13.5	Positive	Positive	1	1	8	6	7	16	2	2	1	0	0	0	0
no	1364	male	63.3863	58		2017-01-01		155.054	49.8405		yes	54.7541	80	11.3	Positive	Positive	4	4	7	7	6	22	3	1.25	1	0	0	0	0
no	1365	male	51	50		2015-03-17		170	79.7	27.5779	no	7	13	3.28	Positive	Positive	0	0	0	0	0	0	0	0	0	0	0	0	1
no	1366	male	58	49		2006-05-01		167	61.7	22.1234	no	112	20	20	Positive	negative	2	2	5	3	2	12	2	0	0	0	0	0	1
no	1367	male	57	55		2013-04-10		158	55.4	22.192	yes	28	12	5.48	Positive	Positive	0	0	1	1	0	2	0	0	0	0	1	0	1
no	1368	male	66	63		2012-10-03		157	50.1	20.3254	no	35	22	18.3	Positive	Positive	0	0	3	3	4	6	1	0.375	1	1	0	0	0
no	1369	male	35	31		2011-11-03		170	63.4	21.9377	no	47	10	3.28	negative	negative	2	1	5	3	2	11	2	0	0	1	0	0	0
no	1370	male	56	50		2009-12-15		166	61.2	22.2093	yes	70	10	3.28	Positive	negative	1	1	2	2	4	6	1	0	0	0	0	0	1
no	1371	male	48	46		2014-09-10		166	53.1	19.2699	yes	15	55	21	Positive	Positive	4	4	4	3	2	15	2	0.25	1	0	0	0	0
no	1372	male	58	48		2005-12-15		164	59.7	22.1966	yes	120	40	2.5	negative	Positive	2	2	3	3	2	10	2	0.375	1	0	0	0	0
no	1373	male	18	6		2000-02-03		137	31.1	16.5699	no	192	31	22.9	negative	negative	2	0	6	6	6	14	2	1.625	1	0	0	0	0
no	1374	male	36	36		2015-12-01		160	46.3	18.0859	yes	2	15	10.9	Positive	Positive	10	6	5	5	4	26	3	1.625	1	0	0	0	0
no	1375	male	59	53		2010-02-08		172	70.6	23.8643	yes	78	85	44.9	Positive	Positive	2	4	4	9	4	19	2	0	0	0	0	0	0
no	1376	male	45	44		2018-04-07		163.005	57.8	21.7533	no	11	4	3.13	Positive	Positive	2	1	0	0	1	3	1	0	0	0	0	0	0
no	1377	male	63	63		2020-04-29		167	56.9	20.4023	no	1	87	31.2	Positive	Positive	2	2	3	3	1	10	2	0	0	0	0	0	0
no	1378	male	65	65		2020-10-09		165.5	44.3	16.1736	yes	5	7	27.2	negative	negative	0	0	2	2	0	4	1	0	0	0	0	0	0
no	1379	male	58	58		2010-10-01		168	55	19.487	no	7	103	42.3	Positive	Positive	5	3	2	2	7	12	2	0.3	1	0	1	0	1
no	1380	male	81	60		1991-01-01		151.58	54.8358		no	244	28	17.9	Positive	Positive	2	11	6	7	2	26	3	1.55	1	1	0	0	0
no	1381	male	61	42		1993-01-01		158.983	63.0925		no	220	82	60.5	Positive	negative	8	13	3	3	6	27	3	1.4	1	0	0	0	0
no	1382	male	54	48		2006-01-01		171.903	71.4594		no	64	60	18.7	Positive	Positive	19	13	7	7	3	46	3	0.85	1	1	0	1	1
no	1383	male	51	49		2012-01-01		167.918	56.9605		no	24	118	73.9	Positive	Positive	14	5	9	8	7	36	3	2.625	1	0	1	0	0
no	1384	male	61	51		2004-03-01		148.776	37.2313		no	120	81	30.7	Positive	Positive	6	2	8	7	7	23	3	2.125	1	0	0	0	1
no	1385	male	42	35		2007-01-01		149.641	45.983		yes	87	45	98.3	Positive	Positive	2	2	2	3	4	9	1	0.625	1	1	0	1	1
no	1386	male	49	44		2010-01-01		156.326	58.1657		yes	51	98	22.8	Positive	Positive	11	4	8	7	6	30	3	2.125	1	0	0	0	1
no	1387	male	75	74		2013-08-01		153	58	24.7768	yes	10	112	69.5	Positive	Positive	23	9	7	7	7	46	3	2.125	1	1	0	0	0
no	1388	male	53	30		1991-08-01		153.87	50.6388		no	276	93	78.4	Positive	negative	19	3	6	6	6	34	3	2.375	1	1	0	0	0
no	1389	male	53	51		2014-03-01		156.092	44.5679		no	24	77	105	Positive	Positive	7	5	6	6	8	24	3	0.75	1	1	1	0	1
no	1390	male	61	51		2006-04-01		161.162	47.996		no	120	30	30.5	Positive	Positive	10	10	8	6	4	34	3	0.625	1	0	0	0	1
no	1391	male	40	32		2008-08-01		162.811	44.9738		yes	93	2	3.3	Positive	Positive	0	0	0	0	0	0	0	0	0	1	0	0	0
no	1392	male	36	32		2012-01-01		154.45	55.7797		yes	53	10	3.16	Positive	Positive	6	6	0	0	3	12	2	0	0	0	0	0	0
no	1393	male	45	43		2014-06-01		153.487	52.2983		no	25	38	36.6	Positive	Positive	2	2	5	5	2	14	2	0.375	1	0	0	0	0
no	1394	male	49	24		1991-09-01		131.851	35.6847		no	300	7	3.16	Positive	Positive	2	2	2	2	4	8	1	0.75	1	1	0	0	0
no	1395	male	47	46		2016-03-01		158.233	45.1504		no	7	45	11.6	Positive	Positive	10	9	3	3	0	25	3	0	0	0	0	0	0
yes	1396	male	61	52	61.9041	2008-01-01	2016-11-22	143.454	51.4016		no	106	22	14.9	Positive	Positive	2	0	7	5	2	14	2	0.625	1	0	1	0	0
no	1397	male	54	54		2016-05-01		173.759	69.9946		no	8	5	3.11	negative	negative	7	7	0	0	2	14	2	0	0	1	0	0	0
no	1398	male	61	58		2015-04-01		160.959	62.7996		yes	33	83	55.6	Positive	Positive	7	7	5	5	5	24	3	0.625	1	0	0	0	0
no	1399	male	65	65		2018-05-01		158.901	49.2944		yes	3	10	3.23	Positive	negative	2	0	0	0	0	2	0	0	0	0	0	0	0
no	1400	male	36	34		2017-05-29		182	69.5	20.9818	yes	17	13	15.9	negative	negative	6	6	6	6	2	24	3	0.75	1	0	0	0	1
no	1401	male	64	63		2018-05-01		156.577	49.3056		yes	8	71	21	Positive	Positive	22	1	8	8	8	39	3	2	1	0	0	0	0
yes	1402	male	49	29	41.7808	2000-05-28	2012-10-29	156.331	62.9794		yes	239	3	3.3	negative	negative	0	0	1	1	0	2	0	0	0	1	0	0	0
no	1403	male	38	36		2018-06-01		168.214	55.0103		no	24	66	35.8	negative	negative	7	2	5	5	3	19	2	0.625	1	0	0	0	1
no	1404	male	18	11		2016-11-07		171.005	50.3	17.2009	no	51	2	2.98	negative	negative	0	0	0	0	0	0	0	0	0	0	0	0	0
no	1405	male	64	63		2020-03-10		159.1	45.1697		yes	20	111	43.4	Positive	Positive	7	4	6	6	2	23	3	1	1	0	0	0	0
no	1406	male	41	35		2005-12-12		181	69.3	21.1532	yes	75	7	3.28	Positive	Positive	0	0	2	2	1	4	1	0	0	0	0	0	1
no	1407	male	69	57		2003-08-01		149	59.9	26.9808	no	147	9	0.53	Positive	Positive	0	0	0	0	0	0	0	0	0	0	0	0	0
no	1408	male	68	68		2016-08-01		179	57.1	17.8209	no	5	19	11.2	negative	negative	1	5	5	5	3	16	2	0	0	0	0	0	0
yes	1409	male	57	55	54.9973	2016-02-12	2015-08-14	168	73.9	26.1834	yes	20	12	3.12	negative	Positive	0	0	0	0	0	0	0	0	0	0	0	0	1
yes	1410	male	62	61	36.8329	2016-12-19	1992-01-01	170	61.5	21.2803	yes	10	32	18.7	negative	Positive	5	5	2	2	4	14	2	0.25	1	0	0	0	0
yes	1411	male	66	65	66.7014	2019-05-18	2020-11-12	170	56.6	19.5848	yes	18	12	3.3	negative	negative	0	0	0	0	0	0	0	0.125	1	1	0	0	0
yes	1412	male	74	69	73.8932	2016-07-05	2020-10-13	170	64.6	22.3529	yes	56	55	13.7	Positive	Positive	2	1	6	6	2	15	2	0.375	1	0	0	0	0
no	1413	male	60	54		2008-01-01		145.239	46.8488		yes	75	126	86.5	negative	Positive	10	10	6	6	7	32	3	0.25	1	1	0	0	0
yes	1414	male	71	51	64.3233	1996-09-01	2009-01-01	167.092	67.3829		yes	240	126	23	Positive	Positive	12	10	5	5	8	32	3	1.375	1	0	0	0	0
no	1415	male	74	34		1982-03-25		155.417	41.2293		no	479	60	60.8	Positive	Positive	28	12	8	6	5	54	3	2.125	1	0	0	0	0
no	1416	male	49	41		2014-04-01		165	61.8	22.6997	yes	96	10	21.3	negative	negative	2	0	4	3	3	9	1	0	0	0	0	0	0
no	1417	male	64	61		2018-12-11		171	69.2	23.6654	yes	37	81	42.6	Positive	Positive	2	2	4	4	2	12	2	0.625	1	0	0	0	1
no	1418	male	59	50		2013-07-01		178	69.6	21.9669	no	107	9	3.3	negative	negative	1	0	2	1	1	4	1	0	0	0	0	0	0
no	1419	male	64	61		2019-06-13		152.5	55	23.6496	no	35	23	3.3	Positive	Positive	8	4	5	5	4	22	3	0.375	1	1	1	0	1
no	1420	male	44	39		2016-12-01		173	68.8	22.9877	no	60	68	10.8	Positive	Positive	13	12	5	6	5	36	3	0	0	0	0	0	0
no	1421	male	59	59		2021-12-01		158	54.2	21.7113	no	2	78	25.8	negative	negative	15	8	5	5	4	33	3	0.75	1	0	0	0	0
yes	1422	male	67	66	67.2247	2021-02-01	2022-02-05	162	59.2	22.5575	yes	12	54	8.83	Positive	Positive	7	0	6	4	7	17	2	1.375	1	0	0	0	0
no	1423	male	60	57		2020-01-23		165	62.4	22.9201	yes	28	83	60	negative	Positive	6	4	7	7	6	24	3	1.25	1	0	0	0	0
no	1424	male	67	67		2021-12-01		167	62.9	22.5537	yes	5	110	49.4	Positive	Positive	2	0	6	6	5	14	2	0.5	1	0	0	1	0
no	1425	male	65	59		2016-07-13		170	66.7	23.0796	no	71	24	4.06	negative	negative	1	0	0	0	0	1	0	0.125	1	1	0	0	0
no	1426	male	64	51		2009-01-01		169	55.7	19.5021	yes	158	75	54.3	Positive	Positive	7	4	4	4	4	19	2	1.25	1	0	0	0	0
no	1427	male	18	15		2018-07-08		160	68.7	26.8359	no	44	2	5.07	negative	negative	0	0	0	0	0	0	0	0	0	1	0	0	0
no	1428	male	45	36		2013-05-01		156	60	24.6548	no	107	8	7.72	negative	Positive	0	0	0	0	0	0	0	0	0	0	0	0	0
no	1429	male	68	68		2021-08-01		178	74.3	23.4503	yes	5	112	68.5	Positive	Positive	7	4	6	6	6	23	3	2	1	0	0	0	0
no	1430	male	57	53		2018-05-01		182	102.4	30.9141	no	48	10	3.3	negative	negative	14	0	6	6	6	26	3	0.5	1	1	0	0	0
no	1431	male	53	52		2021-01-01		168	64.6	22.8883	yes	14	105	24.1	Positive	Positive	4	2	5	5	4	16	2	1.125	1	0	0	0	1
no	1432	male	52	51		2021-06-01		171	60.8	20.7927	no	9	33	7.9	Positive	Positive	4	2	5	3	5	14	2	0	0	1	0	0	0
no	1433	male	58	56		2019-06-26		170	53.1	18.3737	no	33	6	3.3	Positive	negative	0	0	0	0	0	0	0	0	0	0	0	0	0
no	1434	male	58	57		2021-07-01		165	67.8	24.9036	yes	11	15	13.5	Positive	Positive	3	2	1	1	4	7	1	0.125	1	0	0	1	1
no	1435	male	57	53		2018-01-01		161	68.7	26.5036	no	53	10	3.34	negative	negative	0	2	1	1	0	4	1	0.125	1	1	0	0	1
no	1436	male	56	56		2021-03-16		169	66.7	23.3535	no	11	19	7.77	Positive	Positive	1	1	2	1	2	5	1	0	0	1	0	0	0
no	1437	male	58	56		2021-04-01		165	77.7	28.5399	yes	15	122	60.5	Positive	negative	9	7	5	5	5	26	3	1.125	1	1	1	0	0
no	1438	Female	48	27		2002-01-01		155	40.7	16.9407	no	245	23	3.34	Positive	Positive	0	0	0	0	1	0	0	0	0	1	0	0	0
no	1439	Female	76	70		2017-01-01		145	41.7	19.8335	no	67	13	4.2	negative	negative	0	0	1	1	1	2	0	0	0	0	1	0	0
yes	1440	Female	53	52	45.526	2022-02-01	2015-01-12	171.064	63.5945		no	7	75	3.81	Positive	Positive	0	0	2	2	3	4	1	0	0	0	0	0	0
no	1441	Female	42	41		2022-06-01		160	60.7	23.7109	no	3	105	38.3	Positive	Positive	12	7	5	5	5	29	3	0.75	1	1	0	0	1
no	1442	Female	26	22		2018-11-01		160	57	22.2656	no	46	18	3.34	Positive	Positive	1	0	2	2	2	5	1	0	0	0	0	0	0
no	1443	Female	52	51		2021-06-30		162	68.7	26.1774	no	14	12	3.34	Positive	Positive	6	5	5	5	2	21	2	0.375	1	0	0	0	0
no	1444	Female	57	56		2021-01-01		160	55.8	21.7969	no	19	47	3.3	negative	negative	0	0	0	0	1	0	0	0.125	1	0	0	0	0
no	1445	Female	32	31		2021-08-01		160	45.9	17.9297	no	12	55	19.7	Positive	Positive	10	3	7	6	3	26	3	0.375	1	1	0	1	1
no	1446	Female	44	43		2021-04-01		160	45.3	17.6953	no	16	36	7.3	Positive	negative	2	1	2	2	2	7	1	0	0	0	0	0	0
no	1447	male	55	51		2019-01-01		167	57.9	20.7609	no	44	11	3.34	Positive	Positive	0	0	0	0	0	0	0	0	0	0	0	0	0
no	1448	Female	48	45		2020-01-01		157	44.7	18.1346	no	32	23	12	Positive	Positive	0	0	4	4	2	8	1	0	0	0	0	0	0
no	1449	Female	52	44		2014-01-01		159	58.4	23.1004	no	103	7	3.3	Positive	Positive	0	0	0	0	0	0	0	0.125	1	0	0	0	1
no	1450	Female	50	48		2021-03-01		160	47.5	18.5547	no	17	2	3.34	negative	negative	3	0	2	2	2	7	1	0	0	0	1	0	1
no	1451	male	57	48		2014-01-01		168	53.9	19.0972	no	105	52	9.2	Positive	negative	3	2	2	2	2	9	1	0.25	1	0	0	0	0
no	1452	Female	28	27		2022-05-01		148	65.2	29.7663	no	3	35	10.6	Positive	Positive	8	6	6	6	4	26	3	1.25	1	0	0	0	0
no	1453	Female	37	34		2018-10-08		156	49.9	20.5046	no	45	39	3.34	Positive	negative	2	1	1	1	1	5	1	0.5	1	0	0	0	0
no	1454	Female	53	51		2021-01-01		162	68.4	26.0631	no	21	24	3.34	Positive	Positive	0	0	0	0	0	0	0	0	0	0	0	0	1
no	1455	Female	54	41		2009-08-01		160	47.8	18.6719	no	156	28	3.3	Positive	Positive	4	2	1	1	2	8	1	0	0	1	0	0	1
no	1456	Female	62	61		2022-05-01		155	49.9	20.77	yes	4	66	13.3	Positive	negative	6	4	4	4	2	18	2	0.625	1	0	0	0	1
no	1457	Female	61	45		2006-03-01		167.953	61.5736	21.8283	yes	192	97	70.8	Positive	Positive	6	4	4	3	4	17	2	0	0	0	1	1	0
no	1458	Female	45	44		2022-01-01		158	54.9	21.9917	no	7	35	3.34	Positive	negative	0	0	0	0	1	0	0	0	0	0	0	0	0
no	1459	Female	59	36		2000-01-01		150	46.7	20.7556	no	272	64	7.49	Positive	Positive	4	2	7	7	5	20	2	1.125	1	0	0	0	0
no	1460	Female	73	45		1995-01-01		145	52.8	25.113	no	331	40	10.4	Positive	Positive	10	10	5	5	5	30	3	1.5	1	0	0	0	0
no	1461	male	57	54		2020-01-01		162	66	25.1486	no	33	46	7.3	Positive	Positive	8	4	2	2	2	16	2	0.125	1	1	1	0	1
no	1462	Female	50	50		2022-08-01		155	51.5	21.436	no	1	116	44.5	negative	negative	3	0	5	5	1	13	2	1.125	1	0	0	0	0
no	1463	Female	58	45		2009-01-01		156	67.4	27.6956	no	164	70	14.1	Positive	Positive	1	0	0	0	0	1	0	0	0	1	0	0	0
no	1464	Female	57	56		2021-08-01		158	57.4	22.9931	no	12	28	2.5	Positive	Positive	1	0	1	1	1	3	1	0	0	0	0	0	0
no	1465	Female	18	16		2020-03-01		162	52.6	20.0427	no	29	14	4.84	Positive	Positive	1	0	3	1	2	5	1	0	0	0	0	0	1
yes	1466	Female	52	49	49.137	2019-04-01	2018-10-01	162	46.6	17.7564	no	40	6	3.34	Positive	Positive	0	0	0	0	0	0	0	0	0	1	0	0	0
no	1467	male	50	48		2020-06-01		161	52.4	20.2153	no	26	4	3.34	negative	negative	0	0	4	4	2	8	1	0	0	0	0	0	0
no	1468	Female	70	62		2014-01-01		158	47.3	18.9473	no	102	62	6.15	Positive	Positive	7	4	5	5	6	21	2	1.5	1	1	0	0	0
no	1469	Female	70	51		2004-01-01		145	42.5	20.214	no	225	104	22.1	Positive	Positive	3	2	5	5	5	15	2	1.25	1	0	0	1	0
no	1470	Female	76	56		2002-01-01		149	40.5	18.2424	no	248	97	29.7	Positive	Positive	21	0	5	5	4	31	3	1.25	1	0	0	0	0
no	1471	Female	49	34		2007-12-01		168	67.4	23.8804	no	0	24	2.5	negative	Positive	4	4	7	7	6	22	3	0	0	1	0	0	0
no	1472	Female	56	35		2002-01-01		164	91.3	33.9456	no	249	10	5.03	Positive	Positive	2	0	0	0	1	2	0	0	0	0	0	0	1
no	1473	male	66	62		2018-06-01		174.112	61.5612		no	52	62	3.34	negative	negative	2	2	1	1	1	6	1	0.375	1	0	0	0	0
no	1474	male	71	54		2006-01-01		170	55.7	19.2734	no	200	16	5.23	Positive	Positive	19	16	10	6	5	51	3	0	0	1	0	0	1
no	1475	Female	52	49		2018-12-01		163	58.7	22.0934	no	44	13	3.3	negative	negative	0	0	0	0	0	0	0	0	0	0	0	0	0
no	1476	Female	68	65		2020-01-01		148	53.2	24.2878	no	33	11	3.13	negative	negative	1	0	0	0	0	1	0	0	0	1	0	0	0
no	1477	male	69	51		2005-01-01		168	45.4	16.0856	yes	212	132	80.4	Positive	negative	2	2	1	1	1	6	1	0.125	1	1	1	0	0
no	1478	Female	74	56		2005-01-01		160	50.8	19.8438	no	213	60	5.08	Positive	negative	1	0	0	0	1	1	0	0	0	0	0	0	0
no	1479	Female	56	49		2016-01-01		150	35.8	15.9111	no	79	36	7.6	Positive	Positive	0	0	0	0	0	0	0	0	0	0	0	0	0
no	1480	Female	46	42		2019-03-01		154	48.4	20.4082	no	41	7	3.34	Positive	Positive	0	0	0	0	1	0	0	0	0	0	0	1	0
no	1481	Female	50	48		2020-10-01		160	73.3	28.6328	no	22	30	4.84	negative	negative	2	2	2	2	2	8	1	0.125	1	1	0	0	0
no	1482	Female	27	18		2014-01-01		160	44.8	17.5	no	105	46	15	Positive	Positive	1	1	0	0	0	2	0	0	0	1	1	0	0
no	1483	Female	56	29		1996-01-01		157	45.4	18.4186	no	319	47	3.65	Positive	Positive	2	2	4	2	4	10	2	0.25	1	1	0	0	1
no	1484	Female	48	41		2016-01-01		169	57.5	20.1323	no	79	15	3.34	Positive	Positive	1	0	2	2	3	5	1	0.5	1	0	0	0	0
no	1485	Female	54	53		2022-08-01		160	49	19.1406	no	2	46	24.1	Positive	Positive	16	12	8	8	8	44	3	1.25	1	1	0	0	0
no	1486	Female	52	49		2020-07-01		162	53.2	20.2713	yes	25	2	3.34	Positive	Positive	2	0	0	0	0	2	0	0.125	1	0	0	0	1
no	1487	Female	64	54		2012-01-01		135	34	18.6557	no	127	32	14.3	negative	Positive	15	9	9	8	3	41	3	1.125	1	0	0	0	1
no	1488	Female	59	49		2012-01-01		156	49.7	20.4224	no	127	44	20.7	Positive	negative	8	8	3	3	2	22	3	1.25	1	0	0	0	0
no	1489	Female	27	23		2018-01-01		153	53.9	23.0253	no	55	24	3.34	Positive	Positive	0	8	1	1	1	10	2	0	0	0	0	0	1
no	1490	male	59	59		2022-08-01		160	66.1	25.8203	yes	1	23	3.85	Positive	Positive	24	21	8	8	8	61	3	1.125	1	0	1	0	0
no	1491	Female	49	44		2017-01-01		158	51.8	20.7499	no	69	11	11.3	Positive	Positive	0	0	1	1	0	2	0	0.125	1	1	0	0	0
no	1492	Female	49	38		2011-03-01		157	50.5	20.4876	no	137	87	53.2	negative	negative	1	1	8	5	3	15	2	0.5	1	1	1	0	0
no	1493	Female	72	65		2016-01-01		153	48	20.5049	no	81	8	3.34	negative	negative	12	1	6	7	6	26	3	0.625	1	0	0	0	1
no	1494	male	66	43		2000-01-01		160	46.9	18.3203	yes	271	47	11.3	Positive	Positive	2	2	4	4	3	12	2	0.125	1	0	0	0	0
no	1495	Female	63	50		2009-01-01		156	46.1	18.9431	no	163	41	3.34	Positive	Positive	0	2	0	0	1	2	0	0	0	0	0	0	0
no	1496	Female	30	24		2016-08-01		162	55.5	21.1477	no	72	39	3.34	Positive	Positive	8	3	6	5	4	22	3	1.125	1	0	0	0	0
no	1497	Female	45	44		2022-03-01		148	48.8	22.279	no	6	21	7.8	Positive	Positive	2	0	1	0	0	3	1	0	0	0	0	0	0
no	1498	Female	45	30		2007-09-22		156	59	24.2439	no	179	21	3.34	negative	negative	5	4	2	2	2	13	2	0.75	1	0	0	0	0
no	1499	Female	75	62		2009-09-01		151	46.6	20.4377	no	156	80	10	negative	Positive	0	0	3	3	1	6	1	0.375	1	0	0	0	0
no	1500	Female	72	68		2019-02-01		156	44.4	18.2446	no	43	64	3.34	Positive	Positive	0	0	0	0	0	0	0	0	0	0	0	0	0
no	1501	Female	43	38		2018-03-01		147	52.9	24.4805	no	53	137	99.7	negative	negative	6	6	0	1	3	13	2	0	0	0	0	0	1
no	1502	male	60	55		2018-01-01		162	55.8	21.262	no	55	5	12	negative	negative	9	3	2	2	2	16	2	0.875	1	0	0	1	1
yes	1503	Female	73	72	73.6438	2021-09-01	2022-09-15	150	47.6	21.1556	no	12	107	38	Positive	Positive	8	2	5	5	3	20	2	0.5	1	1	1	1	0
no	1504	Female	36	35		2022-01-01		155	54.9	22.8512	no	8	13	3.34	negative	Positive	0	0	0	0	0	0	0	0	0	0	0	0	0
no	1505	Female	42	39		2020-04-01		150	55.5	24.6667	no	30	37	3.34	Positive	Positive	0	0	0	0	0	0	0	0	0	0	0	0	0
no	1506	Female	51	48		2020-01-01		154	56.7	23.9079	no	32	18	3.34	negative	negative	1	0	1	1	1	3	1	0	0	1	0	0	0
no	1507	Female	27	24		2020-01-01		163	51.8	19.4964	no	31	67	15.1	Positive	Positive	0	0	2	1	2	3	1	0	0	0	0	0	0
no	1508	male	66	64		2020-04-01		161	52.8	20.3696	no	28	16	4.79	Positive	Positive	0	0	0	0	0	0	0	0	0	0	0	0	0
no	1509	male	61	59		2020-12-01		170	80.9	27.9931	no	20	45	12.5	Positive	Positive	28	26	7	7	5	68	3	1.875	1	0	1	0	0
no	1510	Female	49	46		2019-03-01		149	59.6	26.8456	no	41	12	3.34	Positive	Positive	0	0	0	0	0	0	0	0	0	1	0	0	1
no	1511	Female	35	34		2022-03-01		163	63.1	23.7495	no	#REF!	5	3.34	negative	Positive	4	3	4	3	3	14	2	0	0	0	0	0	0
no	1512	Female	51	31		2002-09-01		150	43	19.1111	no	#REF!	63	3.13	negative	negative	2	2	1	1	1	6	1	0.125	1	0	0	0	0
no	1513	Female	47	37		2012-06-01		153	56.1	23.9651	no	#REF!	48.8214	55.009	Positive	Positive	0	0	0	0	0	0	0	0	0	0	0	0	1
no	1514	Female	42	18		1999-01-01		154.247	40.3977		no	#REF!	47	11.6	Positive	Positive	24	24	9	8	6	65	3	2	1	0	1	0	0
no	1515	Female	39	39		2022-09-01		158	59	23.634	no	#REF!	54	21	Positive	Positive	5	6	2	2	2	15	2	0.125	1	0	0	0	0
no	1516	Female	74	69		2018-01-01		152	61.2	26.4889	no	#REF!	123	313	negative	negative	0	0	7	6	5	13	2	1	1	0	0	0	0
no	1517	Female	67	51		2007-01-06		150.5	59.6	26.3132	no	#REF!	26	3.34	Positive	negative	0	0	0	0	0	0	0	0	0	0	0	0	0
no	1518	Female	72	41		1992-01-06		159	58.3	23.0608	no	#REF!	60	23.1	Positive	negative	11	11	8	8	7	38	3	1.75	1	0	0	0	1
yes	1519	Female	64	47	54.2438	2006-01-27	2012-09-27	157	56.4	22.8813	no	#REF!	63.4434	45.5205	Positive	Positive	10	2	8	8	7	28	3	1.5	1	0	0	0	0
no	1520	Female	73	69		2019-01-01		156	52.8	21.6963	no	#REF!	63.6087	1.22724	Positive	Positive	0	0	2	2	1	4	1	0.125	1	0	0	0	1
no	1521	Female	71	68		2019-10-06		158	68.2	27.3193	no	#REF!	117	22.7	Positive	Positive	9	3	8	8	5	28	3	1.375	1	1	0	0	0
no	1522	male	71	66		2017-01-27		168	69.7	24.6953	no	#REF!	75	60.9	Positive	Positive	4	12	6	6	6	28	3	0.625	1	1	1	0	1
no	1523	Female	49	45		2018-11-06		167	81	29.0437	no	#REF!	26	11	Positive	Positive	1	1	1	1	1	4	1	0	0	0	0	0	1
no	1524	Female	60	51		2014-01-01		149.732	46.1773		no	#REF!	71.2696	22.2399	Positive	Positive	0	0	8	8	3	16	2	2	1	0	0	0	0
no	1525	male	44	44		2022-07-01		175	69.3	22.6286	yes	#REF!	7	3.34	Positive	negative	3	3	1	1	1	8	1	0.125	1	0	0	0	0
no	1526	male	66	50		2007-01-01		167	78.3	28.0756	no	#REF!	91.2317	11.9344	Positive	Positive	1	1	7	7	7	16	2	1	1	0	0	0	0
no	1527	Female	35	19		2007-03-01		156	45.8	18.8199	no	#REF!	9	3.22	Positive	Positive	12	8	3	3	3	26	3	0.25	1	0	0	0	0
no	1528	Female	54	48		2017-01-01		162	52.1	19.8522	no	#REF!	43	11.2	Positive	Positive	13	10	9	9	3	41	3	2.625	1	1	1	1	1
no	1529	Female	71	26		1977-01-01		131.49	29.2173		no	#REF!	110	3.34	Positive	negative	0	0	4	4	2	8	1	0.375	1	1	0	0	0
no	1530	Female	61	60		2022-04-06		158	59.6	23.8744	no	#REF!	105	12.8	Positive	Positive	7	2	8	8	8	25	3	1.25	1	0	0	0	0
no	1531	Female	53	37		2007-01-01		160	70	27.3438	no	#REF!	65.2285	6.49727	Positive	Positive	4	3	6	6	2	19	2	0.875	1	1	0	0	0
no	1532	Female	43	41		2021-02-01		150	42.7	18.9778	no	#REF!	49	3.34	negative	Positive	6	0	3	3	3	12	2	0.625	1	0	0	0	0
no	1533	Female	40	39		2021-08-01		159	57.6	22.7839	no	#REF!	80	13.4	Positive	negative	1	0	0	0	3	1	0	0	0	0	0	0	1
no	1534	Female	59	53		2017-01-30		156	40.2	16.5187	no	#REF!	25	3.34	Positive	Positive	0	0	0	0	0	0	0	0	0	0	0	0	0
no	1535	Female	58	57		2021-03-06		163	55.1	20.7385	no	#REF!	35	3.34	Positive	Positive	1	1	5	5	2	12	2	0	0	1	0	1	1
no	1536	Female	57	53		2019-01-30		165	49.5	18.1818	no	#REF!	8	3.34	Positive	Positive	2	2	2	2	2	8	1	0.375	1	0	0	0	0
no	1537	Female	57	27		1993-01-30		159	57.6	22.7839	no	#REF!	76	31.1	Positive	Positive	1	1	7	7	4	16	2	1	1	0	0	0	0
no	1538	Female	52	51.25		2019-02-01		157.005	46.2	18.742	no	7	130	101	Positive	Positive	10	6	6	6	8	28	3	2.25	1	0	0	0	0
no	1539	Female	56	54		2019-04-30		150	56.8	25.2444	no	22	39	8.83	Positive	Positive	9	1	5	4	2	19	2	0	0	0	0	0	1
no	1540	Female	63	61		2018-01-10		160	63.8	24.9219	no	29	25	3.11	negative	negative	1	0	2	2	1	5	1	0.125	1	1	0	0	0
no	1541	Female	57	55				148	51.5	23.5117	no	30	22	3.3	Positive	negative	13	2	5	5	4	25	3	1	1	1	0	0	0
no	1542	Female	47	44				156	45.8	18.8199	no	36	14	3.23	Positive	Positive	1	0	5	5	0	11	2	0.25	1	0	0	0	0
no	1543	Female	53	49				165	54.5	20.0184	no	53	18	3.28	negative	Positive	3	1	2	2	2	8	1	0.75	1	1	0	0	0
yes	1544	Female	50	44	35.3562	2009-04-27	2002-02-01	155	44.9	18.6889	no	78	21	3.28	negative	negative	0	0	2	2	0	4	1	0	0	0	0	0	1
no	1545	Female	59	52				148	46.6	21.2747	no	84	14	3.3	Positive	Positive	0	0	2	2	2	4	1	0.25	1	1	0	0	0
no	1546	Female	62	52				148	56.1	25.6118	no	116	45	3.28	Positive	Positive	3	1	5	3	2	12	2	0.5	1	1	0	0	0
no	1547	Female	64	44				155	49.8	20.7284	no	240	16	1.74	Positive	negative	1	1	2	2	2	6	1	0.12	1	1	1	0	0
no	1548	Female	60	39.5833				158	51.8	20.7499	no	245	60	38.6	negative	Positive	17	2	5	5	3	29	3	1.125	1	0	0	0	0
no	1549	Female	54	54		2022-02-28		160	58.7	22.9297	no	1	35	3.3	negative	Positive	5	0	2	0	2	7	1	0	0	1	0	0	0
no	1550	Female	64	55		2014-01-01		152	51.9	22.4636	no	101	64	7.74	negative	Positive	3	0	3	2	2	8	1	0.75	1	0	0	0	1
no	1551	Female	54	52		2020-04-23		163	55.9	21.0396	no	25	21	3.3	negative	negative	10	10	7	7	4	34	3	0.875	1	0	0	0	1
no	1552	Female	31	30		2018-06-01		162	54.3	20.6904	no	12	43	29.5	Positive	Positive	11	7	7	7	6	32	3	1	1	0	0	0	0
no	1553	Female	31	16				160	46.9	18.3203	no	180	11	3.11	negative	Positive	1	1	5	5	3	12	2	0.75	1	0	0	0	0
no	1554	Female	50	32		2004-01-30		152.176	43.7082		no	#REF!	25	3.3	Positive	Positive	4	0	0	0	1	4	1	0.125	1	0	0	0	0
no	1555	Female	73	72		2021-06-30		157.773	51.0213		no	#REF!	140	166	negative	negative	2	2	8	8	8	20	2	1.25	1	0	0	0	0
no	1556	Female	60	51		2014-01-30		153	58.8	25.1185	no	#REF!	16	3.19	Positive	negative	2	0	2	2	1	6	1	0.375	1	0	0	0	0
no	1557	Female	62	53		2014-01-30		140	46.4	23.6735	no	#REF!	37	3.19	Positive	Positive	3	1	2	2	2	8	1	0.875	1	0	0	0	1
no	1558	male	53	38		2007-01-31		168	65.6	23.2426	no	#REF!	53	17.6	Positive	Positive	16	13	5	5	8	39	3	0.75	1	0	1	0	1
no	1559	Female	57	35		2000-10-30		162	70	26.6728	no	#REF!	85	26.26	Positive	Positive	9	9	5	5	7	28	3	0.75	1	0	0	0	1
no	1560	Female	49	36		2009-04-30		170	75.3	26.0554	no	#REF!	38	0.323	Positive	Positive	1	0	6	2	2	9	1	0.375	1	1	0	0	0
no	1561	Female	52	51		2021-02-01		148	43.3	19.7681	no	#REF!	58	11	Positive	Positive	9	5	3	3	4	20	2	0.875	1	0	1	0	1
no	1562	male	51	44		2014-08-31		170	76.6	26.5052	no	#REF!	32	31.2	Positive	Positive	2	3	4	4	6	13	2	0.375	1	0	0	0	0
no	1563	male	77	71		2016-01-31		164	64.6	24.0184	no	#REF!	35	3.19	Positive	Positive	0	0	0	0	0	0	0	0	0	0	0	0	1
no	1564	Female	45	45		2022-07-08		156	65.7	26.997	no	1	54	17.88	Positive	Positive	9	6	5	5	4	25	3	0.25	1	0	0	0	0
no	1565	Female	57	47		2011-01-31		155	64.4	26.8054	no	#REF!	60	7.05	Positive	Positive	23	4	6	6	6	39	3	2.75	1	0	0	0	0
no	1566	Female	66	61		2018-02-01		156	54.5	22.3948	no	#REF!	38	51	negative	negative	3	2	4	4	7	13	2	0.75	1	0	0	0	0
no	1567	Female	50	44		2016-07-31		158	64.7	25.9173	no	#REF!	38	3.34	Positive	Positive	0	0	3	2	2	5	1	0	0	1	1	1	0
no	1568	Female	68	39		1993-05-31		158	48	19.2277	no	#REF!	45	42.13	Positive	negative	1	3	4	4	5	12	2	0.375	1	0	0	0	0
no	1569	Female	64	63		2021-02-01		155.629	56.7702		no	#REF!	20	2.33	Positive	Positive	1	0	7	7	4	15	2	1.125	1	0	0	0	0
no	1570	male	81	80		2021-12-31		150.268	60.4381		no	#REF!	46	9.46	Positive	negative	4	4	4	4	4	16	2	0.5	1	0	0	0	0
no	1571	male	54	50		2018-04-03		161.925	53.2018		no	#REF!	32	13.4	negative	negative	1	0	2	2	1	5	1	0.5	1	0	0	0	0
no	1572	Female	57	50		2015-02-03		155	48.5	20.1873	no	#REF!	32	1.91	Positive	negative	5	5	1	1	1	12	2	0.25	1	0	0	0	1
no	1573	male	75	72		2019-02-03		165	70.4	25.8586	no	#REF!	86	7.94	Positive	negative	0	0	1	1	0	2	0	0.5	1	0	0	0	0
no	1574	male	52	43		2014-02-03		161.756	62.2065		no	#REF!	11	0.23	negative	negative	0	1	0	0	0	1	0	0	0	0	0	0	0
no	1575	Female	58	49		2014-02-03		157	60	24.3418	no	#REF!	9	3.19	Positive	Positive	0	0	0	0	0	0	0	0	0	0	0	0	0
no	1576	Female	47	44		2019-01-30		150	46.1	20.4889	no	#REF!	25	1.38	Positive	negative	4	2	8	8	5	22	3	1.875	1	0	1	0	0
no	1577	Female	51	49		2020-04-30		157.5	58.3	23.5021	no	#REF!	10	3	Positive	Positive	4	1	6	3	5	14	2	1.25	1	0	0	0	0
no	1578	Female	59	56		2020-02-20		168.602	66.1767		no	#REF!	82	8.38	Positive	Positive	2	0	4	4	2	10	2	0.25	1	1	0	0	1
no	1579	Female	35	23		2010-07-31		159.783	63.3404		no	#REF!	23	3.34	negative	negative	0	0	6	6	3	12	2	0.125	1	1	0	1	0
no	1580	male	50	48		2020-10-30		165.388	64.8622		no	#REF!	6	2.22	Positive	negative	9	10	6	6	0	31	3	0	0	1	0	0	0
no	1581	Female	52	37		2008-01-31		164	59	21.9363	no	#REF!	8	3.34	negative	Positive	2	0	2	2	2	6	1	0.125	1	1	0	0	0
no	1582	Female	52	45		2016-01-31		166.586	63.9564		yes	#REF!	6	0.24	Positive	Positive	0	0	1	1	1	2	0	0	0	0	0	0	0
no	1583	male	47	46		2021-08-31		171	71.6	24.4862	no	#REF!	109	42.5	Positive	Positive	0	0	2	2	2	4	1	0.125	1	1	0	1	0
no	1584	Female	62	60		2020-01-31		160	59.9	23.3984	no	#REF!	13	3.34	Positive	Positive	2	1	5	4	2	12	2	0.625	1	1	0	0	1
no	1585	Female	62	54		2014-07-31		163	60.8	22.8838	no	#REF!	27	2.1	Positive	negative	1	0	6	6	2	13	2	0.875	1	0	0	0	0
no	1586	Female	52	40		2010-01-31		150.513	41.4236		no	#REF!	30	3.67	Positive	Positive	2	1	2	2	2	7	1	0	0	1	0	0	1
no	1587	Female	68	67		2021-05-31		165.934	57.8552		no	#REF!	54	10.4	Positive	Positive	0	0	0	0	0	0	0	0.375	1	0	0	0	0
no	1588	Female	68	45		1999-01-31		153.769	51.7496		no	#REF!	30	3.06	Positive	negative	2	1	4	4	0	11	2	0	0	0	0	0	0
no	1589	Female	73	68		2018-02-07		153	66.4	28.3652	no	#REF!	78	24.3	negative	negative	3	1	3	3	1	10	2	1.5	1	0	1	0	0
no	1590	male	52	46		2016-12-07		170	77.5	26.8166	no	#REF!	5	3.19	Positive	Positive	0	0	0	0	0	0	0	0	0	0	1	0	0
no	1591	male	57	57		2021-09-07		172	58	19.6052	no	#REF!	55	24.26	Positive	Positive	1	0	1	1	1	3	1	0	0	1	0	0	0
no	1592	Female	42	37		2017-02-07		160.788	40.984		no	#REF!	21	4.38	negative	Positive	2	1	6	2	4	11	2	0	0	1	1	1	0
no	1593	male	59	52		2015-02-10		157.001	42.5928		no	#REF!	35	5.33	Positive	Positive	2	0	3	2	3	7	1	0	0	0	0	0	0
no	1594	Female	43	41		2020-06-10		159	70	27.6888	no	#REF!	28	3.3	Positive	Positive	3	1	2	2	1	8	1	0.125	1	1	0	0	1
no	1595	male	54	44		2012-12-01		172	56	18.9292	no	#REF!	69	28.14	Positive	Positive	10	0	7	7	5	24	3	0.375	1	0	0	0	0
no	1596	male	36	32		2019-02-10		175	51.2	16.7184	no	#REF!	169	140.98	Positive	Positive	6	0	7	6	2	19	2	2.125	1	0	0	0	0
no	1597	Female	57	46		2012-02-10		161	67.3	25.9635	no	#REF!	14	3.51	negative	negative	8	2	0	0	0	10	2	0	0	0	0	0	0
no	1598	Female	56	52		2019-02-10		162	58	22.1003	no	#REF!	23	10.9	Positive	Positive	28	2	6	6	5	42	3	0.5	1	0	0	0	1
no	1599	Female	53	32		2001-02-10		157	63	25.5588	no	#REF!	8	3.4	Positive	negative	28	0	4	4	4	36	3	0.25	1	0	0	0	0
no	1600	Female	30	28		2020-02-11		150	44.8	19.9111	no	#REF!	80	5.6	Positive	Positive	6	5	7	7	8	25	3	1.125	1	0	0	0	0
no	1601	Female	57	24		1990-02-10		153	53	22.6409	no	#REF!	140	109.95	Positive	Positive	12	12	6	6	5	36	3	1.875	1	1	0	0	0
no	1602	male	73	71		2020-09-10		161	41.1	15.8559	no	#REF!	95	61.21	Positive	Positive	0	0	4	4	2	8	1	1.25	1	0	0	0	0
no	1603	male	60	60		2022-07-10		163	55.5	20.889	no	#REF!	140	38.2	Positive	Positive	22	12	9	9	5	52	3	2.625	1	0	0	0	0
no	1604	Female	54	47		2016-02-10		158	62.4	24.996	no	#REF!	13	0.32	negative	Positive	3	3	3	3	3	12	2	0	0	1	0	0	1
no	1605	Female	42	40		2020-10-10		160	56	21.875	no	#REF!	24	3.19	Positive	Positive	0	0	0	0	0	0	0	0	0	0	0	0	1
no	1606	Female	70	47		1999-02-10		152	46.5	20.1264	no	#REF!	16	3.34	Positive	Positive	4	0	6	6	2	16	2	0	0	1	0	0	1
no	1607	male	69	68		2021-01-10		167	60	21.5139	no	#REF!	94	25.1	negative	Positive	4	3	8	8	4	23	3	1.5	1	1	0	0	0
no	1608	male	60	55		2017-09-10		167	59.4	21.2987	no	#REF!	13	5.24	Positive	Positive	23	1	1	1	2	26	3	0.75	1	0	0	0	0
no	1609	Female	46	45		2021-01-10		155	60	24.974	no	#REF!	39	0.64	Positive	Positive	2	0	5	5	4	12	2	0.25	1	0	0	0	0
no	1610	Female	64	56		2015-02-10		153	49.6	21.1884	no	#REF!	31	42.12	negative	negative	6	2	7	7	5	22	3	1.25	1	1	1	0	0
no	1611	Female	67	59		2014-02-10		150	59	26.2222	no	#REF!	101	42.31	Positive	negative	24	24	6	6	5	60	3	2.25	1	0	0	0	0
no	1612	Female	46	44		2021-04-15		148.152	45.3555		no	#REF!	18	1.3	Positive	Positive	2	2	3	3	2	10	2	0	0	1	1	0	1
no	1613	Female	37.2082	36.7699		2022-10-01		161.01	50.6862		no	#REF!	32	3.41	negative	Positive	4	0	1	1	1	6	1	2.5	1	0	0	0	1
no	1614	Female	57.6986	47.726		2013-04-22		165.312	64.2166		no	#REF!	40	3.41	Positive	Positive	12	10	9	9	8	40	3	0.375	1	1	0	0	0
no	1615	male	68.5918	64.6932		2019-06-29		177.4	62.5285		no	#REF!	56	29.9	Positive	Positive	4	0	2	2	2	8	1	0.125	1	1	0	0	1
no	1616	Female	33.5233	29.1233		2019-01-14		166.147	69.7443		no	#REF!	25	3.41	Positive	Positive	1	1	4	2	2	8	1	0	0	0	0	0	0
no	1617	male	57.5945	52.6877		2018-07-03		170.045	69.5785		no	#REF!	52	13.8	Positive	negative	4	2	0	0	1	6	1	0	0	0	0	0	0
no	1618	Female	56.7589	56.5041		2022-11-27		162.3	48.9087		no	#REF!	42	5.25	Positive	Positive	4	3	2	2	2	11	2	0.125	1	1	0	0	0
no	1619	Female	60.7123	37.7507		2000-04-22		157.355	60.426		no	#REF!	30	4.83	negative	Positive	0	0	1	1	0	2	0	0	0	0	0	0	0
no	1620	Female	52.326	51		2022-05-09		149.289	63.9813		no	12	24	3.34	Positive	Positive	0	0	0	0	0	0	0	0.125	1	0	1	0	0
no	1621	Female	45.274	44.7562		2022-09-01		161.566	51.1319		no	#REF!	10	3.14	negative	Positive	3	0	1	1	2	5	1	2.125	1	0	0	0	0
no	1622	Female	69.9123	69		2023-02-25		152.138	51.4155		no	3	35	3.64	Positive	Positive	0	0	0	0	0	0	0	2	1	0	0	0	0
no	1623	Female	73.4493	53.3342		2003-01-29		159.372	47.3243		no	#REF!	60	46.8	Positive	Positive	8	2	8	8	6	26	3	0	0	0	0	1	1
no	1624	Female	33.389	32.5534		2022-08-14		172.659	56.7093		no	#REF!	7	3.41	negative	negative	0	0	0	0	0	0	0	0.5	1	0	0	0	0
no	1625	Female	33.7616	33.3808		2022-12-29		159.139	60.2307		no	#REF!	56	10.4	negative	negative	2	1	5	5	5	13	2	0	0	0	0	0	0
no	1626	Female	51.1616	48.9945		2021-01-22		162.755	66.4404		no	#REF!	16	3.41	Positive	Positive	0	0	0	0	0	0	0	0	0	0	0	0	1
no	1627	Female	46.9068	46.8219		2023-05-05		149.129	70.9611		no	#REF!	26	3.41	Positive	Positive	5	0	1	1	2	7	1	0	0	1	0	0	0
no	1628	male	52.126	51.9507		2023-03-07		161.81	56.2149		no	#REF!	22	3.41	Positive	Positive	11	7	2	2	3	22	3	0.625	1	1	0	0	0
no	1629	male	68.6219	63.3973		2018-01-22		164.903	44.6946		yes	#REF!	38	7.1	Positive	Positive	4	2	7	7	3	20	2	0.5	1	0	0	0	0
no	1630	Female	52.9562	49.7014		2019-11-20		165.797	65.8061		no	#REF!	54	3.41	negative	Positive	4	2	2	2	2	10	2	3	1	0	1	0	0
no	1631	Female	49.0849	39.9808		2014-01-01		157.151	61.6599		no	#REF!	158	191	negative	negative	28	26	10	10	9	74	3	0.75	1	1	0	0	0
no	1632	Female	54.8932	53.926		2022-04-22		148.075	51.3952		no	#REF!	70	48	Positive	Positive	3	3	2	2	2	10	2	1	1	0	0	0	0
no	1633	Female	52.7452	51.8356		2022-07-05		158.795	46.456		no	#REF!	14	3.41	negative	negative	8	6	3	3	3	20	2	0	0	1	0	0	1
yes	1634	Female	66.9342	56.3534	53.3151	2012-09-30	2009-09-17	162.144	62.6384		no	#REF!	50	3.96	Positive	Positive	0	0	0	0	0	0	0	0.125	1	1	0	0	0
no	1635	Female	60.3918	54.4959		2017-07-03		147.294	57.5058		no	#REF!	30	3.68	Positive	negative	4	0	2	2	2	8	1	0	0	1	0	0	1
no	1636	male	62.726	61		2021-03-06		157.766	55.5116		no	0	12	3.22	Positive	Positive	0	0	0	0	0	0	0	0.5	1	0	0	0	0
no	1637	Female	39.3452	31.1616		2015-01-07		149.469	49.5625		no	#REF!	25	39.5	Positive	Positive	8	8	8	5	5	29	3	0.25	1	0	0	0	0
no	1638	Female	63.3123	53		2012-05-01		169.656	49.4872		no	132	25	4.78	Positive	Positive	5	2	2	2	2	11	2	0.625	1	0	1	0	0
no	1639	Female	49.4603	40.3973		2014-03-22		158.877	37.8674		no	#REF!	55	7.72	Positive	Positive	10	11	3	3	2	27	3	0	0	0	0	0	1
no	1640	Female	58.611	53.1945		2018-01-14		157.002	66.3556		no	#REF!	20	6.18	negative	Positive	1	0	1	0	1	2	0	0.25	1	0	0	0	0
no	1641	Female	55.7068	40.2986		2008-01-14		154.675	55.9167		no	#REF!	23	3.64	Positive	negative	1	0	1	1	1	3	1	0.5	1	0	1	0	0
no	1642	Female	33.8767	33.5918		2023-02-01		159.353	66.013		no	#REF!	60	5.18	negative	Positive	13	9	5	5	5	32	3	0.625	1	1	0	1	1
no	1643	Female	43.1562	36.737		2017-01-05		159.444	50.6683		no	#REF!	6	3.41	negative	Positive	1	0	4	4	3	9	1	0	0	0	0	0	1
no	1644	Female	50.2027	48.263		2021-07-19		141.672	44.274		no	#REF!	11	3.41	negative	negative	0	0	0	0	1	0	0	0.125	1	1	1	1	1
no	1645	male	53.189	52.2384		2022-04-22		152.172	54.6933		no	#REF!	18	3.41	Positive	Positive	3	3	0	0	2	6	1	0.75	1	0	0	0	1
no	1646	male	69.4356	67.5753		2021-04-29		163.428	62.2933		yes	#REF!	90	38.2	Positive	Positive	8	5	7	7	3	27	3	1.125	1	1	0	0	0
no	1647	Female	65.5507	62.2247		2020-01-07		154.001	50.5344		no	#REF!	82	45.2	Positive	Positive	24	20	8	8	8	60	3	0.25	1	0	0	0	0
no	1648	Female	64.4521	64.1945		2023-03-19		163.612	46.5013		no	#REF!	45	3.23	Positive	negative	3	0	2	2	2	7	1	3	1	0	0	0	0
no	1649	Female	60.537	50.3342		2013-01-22		167.812	59.7302		yes	#REF!	140	168	Positive	Positive	16	11	10	10	10	47	3	0.375	1	0	0	0	0
no	1650	Female	60.9479	59.9479		2022-04-26		149.485	43.1398		no	#REF!	58	4.68	Positive	Positive	7	8	2	2	2	19	2	1.375	1	0	0	0	0
no	1651	Female	68.9014	58.4055		2013-01-01		153.357	60.8808		no	#REF!	42	4.19	Positive	negative	2	2	8	8	3	20	2	0.125	1	0	0	1	1
no	1652	Female	52.3123	45.8164		2017-01-01		142.874	58.8772		no	#REF!	0.706187	3.99506	Positive	Positive	4	0	2	2	2	8	1	0	0	0	0	1	0
no	1653	male	77.8493	77.3315		2022-08-01		134.156	30.344		yes	#REF!	37	3.41	Positive	Positive	0	0	1	1	0	2	0	0.375	1	1	1	1	1
no	1654	male	56.6384	55.3534		2021-11-01		153.203	49.9282		no	#REF!	66	35.2	Positive	Positive	3	2	6	3	7	14	2	0.625	1	0	0	0	0
no	1655	Female	67.5918	67.389		2023-01-01		174.171	63.8555		no	#REF!	70	10.9	Positive	Positive	14	12	2	2	4	30	3	1.625	1	0	0	1	1
no	1656	Female	51.9288	49.5315		2021-01-14		146.269	43.2411		no	#REF!	70	138	Positive	Positive	28	26	8	8	8	70	3	0.25	1	0	0	0	0
no	1657	Female	56.074	51.7014		2018-10-01		152.181	44.68		no	#REF!	47	3.41	Positive	Positive	0	0	2	2	2	4	1	0.875	1	0	1	0	1
no	1658	Female	49.4027	40.2356		2014-01-22		173.656	62.6623		no	#REF!	55	7.72	Positive	Positive	13	13	5	5	3	36	3	0	0	1	0	0	0
no	1659	Female	35.9644	21		2008-01-01		160.824	51.5829		no	184	16	6.17	negative	negative	0	0	0	0	0	0	0	1.75	1	0	0	0	0
no	1660	male	60.0904	59		2022-10-01		147.368	48.137		no	0	73	81.3	negative	negative	5	12	6	6	6	29	3	0.5	1	0	0	0	0
no	1661	Female	57.2986	56.9014		2023-01-14		150.018	47.6795		no	#REF!	77	11.1	Positive	Positive	2	0	2	2	1	6	1	1.25	1	1	0	0	1
no	1662	Female	52.8685	43.8493		2014-03-22		169.902	50.0444		no	#REF!	53	18.2	Positive	Positive	2	1	7	7	7	17	2	0.625	1	0	0	0	0
no	1663	Female	58.3342	56.9808		2021-10-01		133.961	32.2405		yes	#REF!	7	3.41	negative	Positive	6	0	5	5	5	16	2	0	0	0	0	0	0
no	1664	Female	39.7288	36.7096		2020-02-29		142.557	50.8017		no	#REF!	12	3.41	Positive	Positive	1	0	0	0	2	1	0	0.375	1	1	1	0	1
no	1665	Female	56.1781	55.5808		2022-08-07		154.326	41.7573		no	#REF!	39	9.41	negative	Positive	3	2	2	2	2	9	1	0.5	1	0	0	0	1
no	1666	Female	71.6685	61.6247		2013-05-24		148.282	47.6179		yes	#REF!	50	3.41	Positive	negative	2	2	2	2	2	8	1	0.25	1	1	0	1	0
no	1667	Female	66.4164	61.9123		2019-01-01		166.019	48.5053		no	#REF!	25	3.3	Positive	negative	1	1	1	1	1	4	1	0	0	1	0	0	0
no	1668	Female	50.9479	40.6247		2013-01-01		167.884	66.8663		no	#REF!	35	3.41	negative	negative	0	0	0	0	0	0	0	0.75	1	0	0	0	1
no	1669	Female	40.1753	38.989		2022-04-22		162.968	62.2038		no	#REF!	18	5.79	negative	Positive	1	1	4	4	3	10	2	0.625	1	1	1	1	1
no	1670	Female	54.2	48.126		2017-01-06		149.618	43.9611		no	#REF!	1.92389	12.3488	Positive	Positive	0	0	3	3	1	6	1	1.25	1	0	0	0	0
no	1671	Female	62.611	51.4521		2012-01-20		155	59.6		no	#REF!	120	65.8	Positive	Positive	13	9	8	8	6	38	3	0.75	1	1	0	0	1
no	1672	Female	49.2822	48.4685		2022-08-14		150.769	55.1667		no	#REF!	5	3.41	negative	negative	0	0	0	0	0	0	0	0	0	0	0	0	0
no	1673	Female	54.9288	51.5315		2020-01-14		165.323	57.1933		yes	#REF!	48	10.7	negative	negative	0	0	3	3	2	6	1	0.375	1	0	0	0	1
no	1674	Female	50.011	49.2877		2022-07-22		164.459	69.9504		yes	#REF!	25	3.22	Positive	Positive	0	0	0	0	0	0	0	0	0	0	0	0	0
no	1675	Female	57.537	49.0301		2015-01-01		152.067	53.1125		no	#REF!	125	3.41	Positive	Positive	8	8	5	5	5	26	3	0.5	1	0	0	1	0
yes	1676	Female	66.6849	64	53.3808	2020-09-01	2010-01-01	163.902	58.8947		no	31	55	41.8	negative	negative	6	4	3	3	2	16	2	0.25	1	0	0	0	0
no	1677	Female	42.4055	32.2767		2013-01-01		155.923	48.951		no	#REF!	5	12.2	Positive	Positive	1	1	2	2	2	6	1	0.375	1	0	0	0	1
no	1678	male	50.7041	49.2466		2021-09-01		164.273	60.2443		yes	#REF!	67	18.2	Positive	Positive	8	8	4	4	2	24	3	0.125	1	0	1	0	0
no	1679	Female	42.8356	41.7589		2022-04-14		149.308	41.9566		no	#REF!	22	3.41	Positive	Positive	5	5	5	5	2	20	2	0.125	1	0	0	0	0
no	1680	Female	43.3123	41.3288		2021-03-01		151.012	51.4837		no	#REF!	27	9.68	Positive	Positive	10	5	2	2	2	19	2	0.25	1	0	1	0	0
no	1681	male	64.9123	56.9178		2015-04-22		159.315	44.2663		yes	#REF!	55	150	Positive	Positive	4	0	5	5	6	14	2	1.25	1	1	0	0	0
no	1682	male	57.3863	56.126		2022-01-16		169.938	59.6285		yes	#REF!	98	22.6	Positive	Positive	16	12	7	7	7	42	3	1.625	1	0	0	0	0
yes	1683	Female	55.4548	29.4822	53.9918	1997-05-05	2021-11-01	162.489	57.5927		yes	#REF!	34	3.41	Positive	Positive	2	2	0	0	1	4	1	0	0	0	0	0	0
no	1684	Female	41.2575	32		2014-05-13		169.137	53.8652		yes	#REF!	30	3.41	Positive	Positive	0	0	0	0	0	0	0	0	0	0	0	0	0
no	1685	Female	51.1836	40.7616		2013-01-14		162.899	60.1228		no	#REF!	33	8.83	Positive	Positive	13	8	5	5	6	31	3	1.25	1	1	0	1	0
no	1686	Female	56.8767	53.5452		2019-11-22		152.444	53.8001		no	#REF!	55	10.7	negative	negative	2	2	4	4	4	12	2	0.125	1	0	0	0	1
no	1687	Female	64.6603	52.4137		2011-01-30		171.657	60.6909		no	#REF!	70	60	Positive	Positive	14	9	8	8	6	39	3	2	1	1	0	0	1
no	1688	male	60.4795	60.2575		2022-12-01		180.442	63.0829		no	#REF!	55	26.9	Positive	Positive	1	1	0	1	0	3	1	0	0	1	0	0	0
no	1689	male	68.6164	58.5096		2013-01-29		154.207	48.6087		yes	#REF!	30	9.04	Positive	Positive	2	1	1	1	1	5	1	0.5	1	1	0	0	1
no	1690	Female	68.3014	50.8932		2006-01-05		167.145	71.4236		no	#REF!	32	7.69	negative	negative	0	0	0	0	0	0	0	0	0	0	0	0	0
no	1691	Female	47.0986	38.9726		2015-01-02		154.682	50.17		no	#REF!	29	8.8	negative	negative	2	1	1	1	1	5	1	0	0	1	0	0	0
no	1692	Female	68.8164	62.8986		2017-05-26		158.642	37.6075		no	#REF!	37	3.81	Positive	negative	0	0	1	1	1	2	0	0.125	1	1	0	1	1
no	1693	Female	57.4548	52.4932		2018-03-01		158.826	47.5225		no	#REF!	54	13.1	negative	Positive	4	4	4	4	3	16	2	0.75	1	1	0	0	0
no	1694	Female	67.9753	67.6329		2022-10-01		152.483	66.9112		yes	#REF!	66	40.2	Positive	Positive	26	26	10	8	8	70	3	2.625	1	0	0	0	0
no	1695	Female	50.0685	34.874		2008-01-22		150.449	52.5749		no	#REF!	79	21.9	negative	negative	5	4	9	9	9	27	3	2	1	0	0	0	1
no	1696	Female	67.4521	45.6301		2001-05-01		145.871	47.4777		no	#REF!	53	10.2	Positive	negative	3	3	7	7	3	20	2	1.375	1	0	0	0	0
no	1697	male	67.6219	55.3781		2011-01-25		164.034	45.0888		no	#REF!	53.7687	55.9385	Positive	Positive	1	1	6	4	2	12	2	0.375	1	0	0	0	0
no	1698	Female	40.663	31.7726		2014-07-24		153.701	48.5287		yes	#REF!	47	4.85	Positive	Positive	7	7	5	4	3	23	3	0.875	1	1	0	1	0
no	1699	Female	47.7479	37.3616		2013-01-24		155.307	48.2003		no	#REF!	13	3.64	Positive	Positive	1	0	1	1	1	3	1	0	0	0	0	0	0
no	1700	Female	55.0438	54.4137		2022-09-01		178.165	69.6548		no	#REF!	6	3.41	negative	negative	2	2	3	3	2	10	2	0.5	1	1	0	0	0
no	1701	Female	48.8055	24.9562		1999-07-26		157.872	50.9416		no	#REF!	60	4.01	Positive	Positive	0	0	3	3	0	6	1	0.5	1	0	0	0	1
no	1702	Female	64.7068	59.7753		2018-04-22		153.089	46.8641		no	#REF!	88	44.9	Positive	Positive	5	4	5	5	5	19	2	0.875	1	0	0	0	0
no	1703	Female	41.4329	41.211		2022-12-01		151.423	39.3944		no	#REF!	18	3.41	Positive	Positive	3	3	1	1	1	8	1	0.125	1	0	0	0	0
no	1704	Female	45.5041	21.5397		1999-02-20		161.62	48.4829		no	#REF!	32.8751	9.33	Positive	Positive	2	0	0	0	2	2	0	0.875	1	0	0	0	0
no	1705	Female	47.8	46.7096		2022-01-27		162.012	57.7455		no	#REF!	1	4.87	Positive	Positive	1	0	1	1	0	3	1	0	0	0	0	0	0
no	1706	Female	46.9315	41.4247		2018-01-01		161.441	72.897		no	#REF!	105	3.41	Positive	Positive	0	0	1	1	0	2	0	0.25	1	0	0	0	0
no	1707	Female	56.8055	56.2274		2022-08-01		168.468	57.8873		yes	#REF!	107	47	Positive	Positive	24	22	8	8	8	62	3	0.875	1	0	0	0	0
no	1708	Female	63.0137	52.0795		2012-03-27		155.78	61.9124		no	#REF!	25	3.22	negative	negative	3	1	2	2	2	8	1	0	0	1	0	0	1
no	1709	Female	50.3644	49.7836		2022-09-26		161.555	56.3229		no	#REF!	8	3.41	negative	negative	2	1	0	0	1	3	1	0	0	0	0	0	0
no	1710	Female	54.1397	50.1507		2019-05-29		161.912	60.0975		yes	#REF!	20	3.41	negative	Positive	0	0	0	0	0	0	0	0	0	0	0	0	0
no	1711	Female	50.3808	47.2137		2020-01-22		137.19	42.8997		no	#REF!	5	3.41	negative	negative	7	3	1	1	2	12	2	0	0	1	0	0	0
no	1712	male	47.2849	36.7973		2013-01-01		152.645	48.2868		no	#REF!	120	64.2	Positive	Positive	5	4	10	8	8	27	3	2	1	1	0	1	1
no	1713	Female	60.1315	59.3808		2022-08-14		139.394	40.4188		no	#REF!	108	44.1	Positive	negative	16	13	7	7	6	43	3	0.75	1	0	0	0	1
no	1714	male	65.2219	60.3151		2018-04-22		158.158	60.7223		no	#REF!	45	3.55	Positive	Positive	13	11	4	4	6	32	3	0.875	1	0	0	0	0
yes	1715	Female	49.0493	46.9863	48.6521	2021-05-03	2023-01-01	163.899	70.5471		no	#REF!	128	60.2	Positive	Positive	4	2	8	8	8	22	3	1.625	1	0	0	0	0
no	1716	Female	61.0904	60.6822		2023-02-01		165.188	73.1473		no	#REF!	122	59.6	Positive	Positive	28	26	9	9	9	72	3	2.875	1	0	0	0	0
no	1717	Female	50.9233	20.2521		1992-07-21		150.563	43.7943		no	#REF!	43	3.41	negative	negative	2	1	3	3	6	9	1	0.625	1	1	0	0	1
no	1718	Female	45.7671	38.6247		2016-01-01		163.785	50.7952		no	#REF!	12	3.41	Positive	Positive	1	0	0	0	1	1	0	0	0	1	0	0	0
no	1719	Female	58.0274	47.5315		2013-01-01		152.904	57.6252		no	#REF!	60	3.41	Positive	negative	28	28	9	9	9	74	3	2.125	1	0	0	0	1
no	1720	Female	49.0329	38.7288		2013-01-29		151.223	46.3705		no	#REF!	20	3.41	Positive	negative	0	0	0	0	0	0	0	0	0	0	0	0	0
no	1721	Female	34.011	25.5233		2015-01-01		155.044	53.4487		no	#REF!	17	3.64	Positive	negative	4	2	1	1	1	8	1	0	0	1	0	0	1
no	1722	Female	54.674	54.1808		2022-10-30		160.969	41.3789		yes	#REF!	40	6.14	Positive	Positive	3	3	2	2	2	10	2	0	0	1	1	0	1
yes	1723	Female	53.2658	50.3973	48.0658	2020-05-01	2018-01-01	144.744	44.2265		no	#REF!	25	3.41	Positive	Positive	10	0	2	2	2	14	2	0.375	1	0	0	0	0
no	1724	Female	50.9123	49.0219		2021-03-20		156.01	55.5827		no	#REF!	15	11.8	Positive	Positive	3	1	4	4	4	12	2	1.125	1	0	0	0	0
no	1725	Female	23.6849	21.4822		2021-01-01		169.787	61.3717		no	#REF!	5	3.41	Positive	negative	0	0	0	0	0	0	0	0	0	0	0	1	0
no	1726	Female	58.9671	58.1233		2022-04-27		161.269	56.9498		no	#REF!	79	10.8	Positive	Positive	15	8	4	4	2	31	3	0.5	1	0	0	0	0
no	1727	Female	67.3589	62.8767		2018-11-12		156.399	47.646		no	#REF!	75	5.98	Positive	Positive	8	4	4	4	4	20	2	1.375	1	1	0	0	1
no	1728	male	34.3068	32.3863		2021-06-14		143.286	42.0912		no	#REF!	107	47.6	Positive	negative	28	16	6	6	5	56	3	1	1	1	0	0	0
no	1729	male	36.5699	36.4082		2022-12-27		155.968	46.0826		yes	#REF!	12	3.41	Positive	Positive	12	9	6	4	5	31	3	0.25	1	0	0	0	0
no	1730	male	48.5644	48.1808		2022-11-22		158.205	56.8355		yes	#REF!	27	21.2	Positive	Positive	9	10	7	7	3	33	3	0.25	1	0	0	0	0
no	1731	Female	58.7918	48.874		2013-06-06		136.502	33.4184		no	#REF!	113	64.7	Positive	negative	0	0	0	0	0	0	0	0	0	0	0	0	1
no	1732	Female	89.389	68.937		2003-01-11		153.255	65.9177		yes	#REF!	85	40.6	Positive	Positive	8	6	8	8	8	30	3	2.5	1	1	0	1	0
no	1733	Female	59.4219	58.1781		2022-01-26		168.036	60.5746		no	#REF!	1.87945	9.90658	Positive	Positive	10	8	2	2	2	22	3	0.25	1	0	0	0	0
no	1734	male	70.3973	70.3342		2023-04-03		152.439	53.6257		no	#REF!	55	141	Positive	Positive	26	24	8	8	8	66	3	1.75	1	0	0	0	1
no	1735	male	52.5315	51.7233		2022-06-22		157.037	46.9132		no	#REF!	3	3.41	negative	negative	9	9	2	2	1	22	3	0.125	1	1	0	1	0
no	1736	Female	45.326	36.3096		2014-05-19		155.211	43.5456		no	#REF!	4	3.64	negative	negative	0	0	1	1	0	2	0	0.125	1	1	0	0	0
no	1737	male	58.1616	56		2021-02-26		154.597	48.3588		yes	0	65	18.2	Positive	Positive	3	3	2	2	2	10	2	0.125	1	1	0	0	0
no	1738	Female	54.8219	53.9781		2022-06-30		154.072	42.0628		no	#REF!	118	91.2	negative	negative	0	0	0	0	0	0	0	0	0	0	0	0	0
no	1739	male	54.1178	53		2022-11-01		169.626	69.6191		no	0	35	6.62	Positive	Positive	0	2	0	0	0	2	0	0	0	0	0	0	0
no	1740	Female	45.9781	44.9014		2022-03-30		177.02	63.1792		no	#REF!	41	7.56	Positive	Positive	8	4	2	2	2	16	2	0.125	1	0	1	0	1
no	1741	male	35.8548	35.7808		2023-03-22		176.931	60.8247		no	#REF!	16	14.1	Positive	Positive	2	8	1	1	1	12	2	0	0	0	0	0	1
no	1742	Female	68.2904	37.8055		1993-01-01		151.67	42.6285		no	#REF!	124	26.2	Positive	Positive	28	26	8	8	8	70	3	2.75	1	0	0	0	0
no	1743	Female	59.0438	58.2712		2022-05-29		157.582	49.7924		no	#REF!	68	22.1	Positive	negative	22	20	5	5	5	52	3	1.125	1	1	0	1	0
no	1744	Female	63.9808	53.9233		2013-01-20		154.613	56.6997		no	#REF!	35	3.41	Positive	negative	0	0	0	0	0	0	0	0	0	0	0	0	1
no	1745	male	60.1644	53.8356		2017-01-06		167.443	61.5635		yes	#REF!	64	3.41	Positive	Positive	3	3	4	4	4	14	2	0.5	1	1	0	0	1
no	1746	Female	56.8384	53.9288		2020-04-03		147.825	40.5538		no	#REF!	22	3.41	Positive	Positive	6	3	0	0	0	9	1	0	0	0	1	0	1
no	1747	Female	39.1644	34.0082		2018-01-20		160.817	62.3386		no	#REF!	40	3.41	Positive	Positive	7	5	6	4	2	22	3	0.625	1	1	0	0	1
no	1748	Female	53.4795	44.0055		2014-01-01		138.119	44.8319		no	#REF!	15	36.5	Positive	Positive	12	4	3	3	3	22	3	0.5	1	0	0	0	0
no	1749	Female	71.0548	51.1315		2003-06-07		152.33	44.1876		no	#REF!	64	3.41	Positive	negative	28	28	6	6	6	68	3	1	1	0	0	0	0
no	1750	Female	53.4849	35.0042				162.094	71.566		yes	0	24.6876	48.5218	Positive	Positive	0	0	0	0	0	0	0	0.125	1	0	0	1	1
no	1751	Female	60.6055	60.463		2023-02-25		159.061	51.2643		no	#REF!	35	8.34	Positive	Positive	17	12	5	5	5	39	3	1	1	0	1	0	0
no	1752	male	65.4329	62.0137		2020-01-14		146.819	50.3096		no	#REF!	116	14.5	Positive	Positive	0	0	1	1	1	2	0	0	0	0	0	0	0
no	1753	Female	42.0904	41.9288		2023-05-01		156.556	64.0101		no	#REF!	78	9.77	Positive	Positive	14	9	2	2	2	27	3	0.25	1	1	0	0	1
no	1754	Female	25.8575	21.3918		2019-01-01		177.985	63.1996		no	#REF!	10	3.41	negative	Positive	1	1	2	2	2	6	1	0.25	1	0	0	0	0
no	1755	Female	76.7068	29.7205		1976-03-02		139.611	51.1857		yes	#REF!	36	5.68	negative	negative	0	0	1	1	1	2	0	0	0	0	0	0	0
yes	1756	Female	51.589	43.3068	30.5534	2014-09-30	2002-01-01	157.898	51.4134		no	100.767	17	3.64	negative	negative	2	0	1	0	1	3	1	0	0	0	0	0	1
yes	1757	Female	63.2932	54.1945	49.874	2013-12-26	2009-09-01	146.001	52.7112		no	110.7	25	3.64	negative	negative	1	1	2	2	2	6	1	0	0	0	0	0	0
no	1758	Female	47.726	29.1041		2004-06-20		178.114	58.3108		no	226.567	52	7.82	Positive	negative	10	8	3	3	2	24	3	0.75	1	1	1	0	1
no	1759	Female	34.3589	28.7425		2017-06-22		169.819	66.0798		no	68.3333	23	3.64	Positive	Positive	2	0	7	5	3	14	2	0	0	1	1	0	1
no	1760	Female	55.8822	47.326		2014-07-27		151.924	49.4228		no	104.1	22	3.64	Positive	Positive	7	4	4	5	2	20	2	0.125	1	1	0	0	0
no	1761	Female	34.5644	22.6164		2011-03-10		163.957	43.4163		no	145.367	17	3.64	negative	Positive	2	0	5	2	3	9	1	0	0	0	0	0	0
no	1762	Female	62.9288	61.1315		2021-05-01		158.407	61.5674		no	21.8667	35	3.64	Positive	Positive	3	3	2	2	2	10	2	0.375	1	0	0	0	0
yes	1763	Female	56.8877	19.937	50.5233	1986-03-22	2016-10-14	153.488	44.4161		no	449.567	9	3.64	Positive	negative	2	1	2	2	1	7	1	0.75	1	1	0	1	1
no	1764	Female	59.863	46.7644		2010-01-27		163.238	72.1075		no	159.367	4	3.64	negative	negative	19	2	6	6	2	33	3	0.875	1	0	0	0	1
no	1765	Female	51.9644	44.9479		2016-03-01		162.989	46.184		no	85.3667	17	3.64	Positive	Positive	0	0	0	0	0	0	0	0	0	0	0	0	1
no	1766	Female	40.9452	30.4411		2012-09-12		165.997	56.0451		no	127.8	45	21.7	Positive	Positive	1	0	2	0	2	3	1	0	0	0	0	0	0
no	1767	Female	53.5753	47.874		2017-07-01		163.605	68.766		no	69.3667	20	3.64	negative	negative	5	0	6	4	6	15	2	0	0	0	0	0	0
yes	1768	Female	71.7808	58.1808	62.5397	2009-08-24	2014-01-01	147.86	35.5796		no	165.467	83.9478	63.5632	Positive	Positive	25	15	5	5	5	50	3	1.25	1	0	0	0	0
no	1769	Female	67.0767	59.4027		2015-08-11		157.119	55.3211		no	93.3667	35	3.64	Positive	Positive	1	0	2	2	3	5	1	0	0	0	0	1	1
no	1770	Female	26.8137	11.8795		2008-05-16		151.58	60.9498		no	181.7	2	3.64	negative	negative	0	0	0	0	0	0	0	0	0	0	0	0	0
no	1771	male	18	14.4795		2021-08-26		157.514	52.841		no	20.1667	3	3.64	Positive	Positive	0	0	0	0	0	0	0	0	0	0	0	0	0
yes	1772	Female	35.4685	29.0274	18.1041	2016-12-01	2006-01-01	168.471	58.9957		yes	78.3667	22	8.67	negative	Positive	0	0	0	0	0	0	0	0	0	0	0	0	0
no	1773	Female	72.9205	59.5918		2010-01-14		148.827	64.9905		no	162.167	38	27.6	negative	Positive	2	2	0	0	0	4	1	0	0	0	0	0	0
no	1774	Female	22.9863	14.1836		2014-09-01		143.364	41.5032		no	107.1	25	5.62	negative	negative	0	0	0	0	0	0	0	0	0	0	0	0	0
no	1775	Female	30.2658	29.263		2022-07-03		156.223	53.8502		no	12.2	24	3.92	negative	Positive	10	7	10	8	6	35	3	1	1	0	0	0	0
no	1776	Female	52.7315	51.8082		2022-08-02		162.996	40.6602		yes	11.2333	110	44	negative	negative	15	10	4	4	4	33	3	1.125	1	0	0	0	0
no	1777	Female	55.1452	47.9644		2016-05-01		151.167	43.6253		no	87.3667	7	3.64	Positive	Positive	0	0	0	0	0	0	0	0	0	0	1	1	0
no	1778	Female	58.389	57.2822		2022-06-03		157.494	52.6979		no	13.4667	34	21.1	Positive	Positive	9	3	8	7	6	27	3	1.125	1	1	0	0	0
no	1779	Female	74.8877	60.3507		2009-01-01		159.741	57.091		no	176.867	94	39.3	negative	negative	12	10	5	5	5	32	3	0.625	1	0	0	0	0
no	1780	male	60.1973	57.6658		2021-01-01		154.273	54.7826		no	30.8	32	3.7	Positive	Positive	3	2	2	2	2	9	1	0.375	1	1	0	0	0
no	1781	Female	53.6904	50.1479		2020-01-01		161.192	48.035		no	43.1	6	5.66	Positive	Positive	1	0	1	1	1	3	1	0.125	1	0	0	0	0
no	1782	male	69.7014	49.1479		2003-01-01		146.178	40.4599		no	250.067	1	3.64	negative	negative	8	2	5	5	3	20	2	0.75	1	0	0	0	1
no	1783	Female	32.8274	30.8274		2021-07-17		167.125	62.6394		no	24.3333	17	3.64	Positive	negative	0	0	0	0	0	0	0	0	0	0	0	0	0
no	1784	Female	54.7562	52.5452		2021-05-01		168.754	65.4075		no	26.9	50	5.45	negative	negative	7	4	5	3	7	19	2	0.375	1	0	0	0	0
no	1785	Female	82.1014	76.5534		2018-01-01		167.704	42.3946		no	67.5	45	9.07	Positive	Positive	4	0	4	4	4	12	2	1.5	1	0	1	0	1
no	1786	Female	54.3233	47.4027		2016-08-18		152.047	46.2636		no	84.2	60	12.1	negative	Positive	5	3	4	4	4	16	2	0.875	1	0	0	0	0
no	1787	Female	73.1726	52.6603		2003-01-18		158.515	43.421		no	249.567	57	7.37	negative	negative	1	1	4	4	2	10	2	0.5	1	1	0	0	1
no	1788	Female	53.3479	52.9315		2023-02-18		154.491	42.5499		no	5.06667	9	3.64	Positive	Positive	5	2	2	2	2	11	2	0	0	0	0	1	0
no	1789	male	67.5096	66.9589		2023-01-01		156.448	55.2682		yes	6.7	26.3616	19.2601	Positive	Positive	23	17	8	8	8	56	3	1.875	1	0	0	0	1
no	1790	Female	30.7479	21.1918		2014-01-01		146.505	36.253		no	116.267	30	3.64	Positive	negative	4	4	2	2	4	12	2	0.25	1	0	0	0	0
no	1791	Female	65.3808	56.8164		2015-01-01		156.33	42.3906		no	104.2	25	3.64	Positive	Positive	3	1	1	1	2	6	1	0.125	1	0	0	0	0
no	1792	Female	59.863	57.6055		2021-04-21		148.562	58.5502		no	27.4667	56	3.64	negative	negative	5	4	1	1	1	11	2	0	0	0	0	1	1
no	1793	Female	66.5397	36.9616		1994-01-01		160.153	58.8364		no	359.867	142	60.1	Positive	negative	14	3	6	6	6	29	3	1.75	1	1	0	0	1
no	1794	Female	40.2575	39.7836		2023-02-01		162.91	53.9756		no	5.76667	90	36.8	Positive	Positive	0	0	0	0	1	0	0	0	0	0	1	0	1
no	1795	male	65.526	65.0301		2023-01-25		142.299	52.9895		no	6.03333	122	149	Positive	Positive	8	3	5	5	4	21	2	1	1	0	0	1	0
no	1796	Female	68.4548	50.8932		2006-01-05		141.681	50.5888		no	213.667	18.1126	1.92076	Positive	Positive	0	0	0	0	0	0	0	0	0	0	0	0	1
no	1797	Female	45.8164	43.2521		2021-01-01		164.849	59.505		no	31.2	35	3.64	negative	negative	6	4	2	2	2	14	2	0.5	1	1	0	0	1
no	1798	Female	66.0986	65.5123		2022-12-24		154.331	49.6503		no	7.13333	84	5.47	Positive	Positive	7	7	2	2	2	18	2	0.25	1	0	0	0	1
no	1799	male	64.9397	56.4301		2015-01-24		161.453	52.9443		yes	103.533	26	4.72	negative	negative	1	0	2	2	2	5	1	0.5	1	0	0	0	0
no	1800	male	27.537	22.0329		2018-01-25		153.966	50.1913		no	66.9667	63	22.8	negative	Positive	4	0	1	1	1	6	1	0	0	1	0	0	0
no	1801	male	60.8548	60.3507		2023-01-24		159.496	53.8569		yes	6.13333	16	3.64	Positive	negative	4	1	1	1	1	7	1	0	0	0	0	0	0
no	1802	Female	37.8877	37.8767		2023-07-24		151.901	45.6064		no	0.133333	26	3.64	negative	Positive	4	3	4	4	3	15	2	0.25	1	0	0	0	0
no	1803	Female	74.7616	71.8055		2020-08-13		154.774	61.6597		no	35.9667	46	3.64	Positive	Positive	0	0	0	0	0	0	0	0.125	1	0	0	0	0
no	1804	Female	67.5178	63.7973		2019-11-08		165.594	58.4247		no	45.2667	35	3.64	Positive	negative	1	0	6	6	4	13	2	1.875	1	1	0	0	1
no	1805	Female	44.4192	41.4849		2020-08-24		152.315	39.5367		no	35.7	59	49.7	negative	negative	12	6	5	4	4	27	3	0.875	1	1	0	0	0
no	1806	Female	83.6137	83.1863		2023-02-25		167.774	63.3419		no	5.2	45	3.64	Positive	negative	0	0	3	3	0	6	1	3	1	0	1	0	1
no	1807	Female	59.9068	52.9671		2016-08-24		157.856	63.2755		no	84.4333	28	3.64	Positive	Positive	0	0	0	0	0	0	0	0	0	0	1	0	0
no	1808	Female	51.9452	47.7534		2019-05-25		155.037	41.475		no	51	24	3.64	Positive	Positive	3	0	0	0	1	3	1	0	0	0	0	0	1
no	1809	male	66.874	64.3534		2021-01-25		158.434	60.1291		no	30.6667	69	55.1	Positive	Positive	19	9	5	5	5	38	3	1.5	1	0	0	0	0
no	1810	Female	40.8959	33.1178		2015-10-25		157.885	37.8881		no	94.6333	22	3.64	Positive	Positive	5	5	2	2	5	14	2	0.125	1	0	0	0	0
no	1811	Female	69.5397	68.3534		2022-05-28		146.915	40.7369		no	14.4333	35	3.64	negative	negative	15	14	10	10	6	49	3	3	1	1	0	0	1
no	1812	Female	32.9425	30.0932		2020-09-28		148.696	53.5212		no	34.6667	35	3.64	negative	Positive	2	0	3	1	1	6	1	0.125	1	0	0	0	1
no	1813	Female	63.9014	56.0055		2015-09-19		160.986	65.0339		no	96.0667	10	3.64	Positive	Positive	1	0	0	0	1	1	0	0	0	0	0	0	0
no	1814	Female	67.7507	57.137		2013-01-01		148.882	45.1785		no	129.133	16	3.64	negative	negative	28	21	8	8	8	65	3	1	1	0	0	0	0
no	1815	Female	48.1808	25.2521		2000-09-14		147.562	44.2277		no	278.967	54.6173	18.4432	Positive	Positive	0	0	0	0	0	0	0	0	0	1	1	0	0
no	1816	Female	60.989	55.3753		2018-01-04		151.107	64.2166		no	68.3	15	3.64	negative	negative	0	0	0	0	0	0	0	0	0	0	0	0	0
no	1817	Female	49.4521	32.8301		2007-01-04		164.97	77.3179		no	202.233	98	54.4	Positive	Positive	26	24	6	6	4	62	3	1.125	1	0	0	0	0
yes	1818	male	66.7973	56.7918	62.6712	2013-08-15	2019-07-01	168.322	72.6462		yes	121.733	20	18.1	Positive	Positive	2	0	0	0	1	2	0	0	0	0	0	0	0
yes	1819	male	59.6192	57.2466	57.4137	2021-04-01	2021-06-01	161.867	57.2361		no	28.8667	43	52	Positive	negative	20	3	4	4	4	31	3	0.5	1	0	0	0	0
no	1820	Female	36.2411	31.4575		2018-11-04		127.584	41.628		no	58.2	24	3.64	Positive	Positive	0	0	0	0	0	0	0	0	0	0	0	0	1
no	1821	Female	49.8	48.7671		2022-08-04		170.98	48.973		no	12.5667	24	3.64	Positive	negative	6	5	1	1	2	13	2	0.125	1	0	0	0	0
no	1822	Female	71.4	62.4466		2014-09-04		168.957	52.179		no	108.933	144	114	Positive	Positive	18	7	6	6	6	37	3	1.5	1	0	0	0	0
no	1823	Female	32.7205	27.1014		2018-01-04		171.981	66.448		no	68.3667	20	7.81	negative	negative	28	24	3	3	4	58	3	0.825	1	1	1	0	0
no	1824	Female	74.0521	45.4164		1995-01-04		146.864	50.5948		no	348.4	76	25.1	Positive	negative	28	5	8	8	8	49	3	2.75	1	1	1	0	1
no	1825	Female	56.3507	56.0603		2023-05-04		158.553	55.3722		no	3.53333	103	58.2	negative	negative	0	0	0	0	0	0	0	0	0	0	0	0	0
no	1826	Female	82.7068	81.2493		2022-03-04		148.271	46.2975		no	17.7333	42	9.11	negative	negative	9	3	5	5	4	22	3	1.5	1	0	0	0	0
no	1827	Female	33.9315	33.0438		2022-10-01		152.263	52.4396		no	10.8	30	3.64	Positive	Positive	0	0	4	3	3	7	1	0.625	1	1	0	0	0
no	1828	Female	52.3863	44.589		2015-11-05		155.743	45.6288		no	94.8667	102	48.5	Positive	Positive	21	15	4	4	4	44	3	1.375	1	1	1	0	0
yes	1829	Female	68.5945	64.9644	67.7288	2020-01-05	2022-10-10	150.022	58.711		no	44.1667	77	10.1	Positive	negative	28	2	4	4	7	38	3	0.875	1	0	1	0	0
no	1830	Female	44.8849	43.5808		2022-05-05		163.118	59.6148		no	15.8667	52	34.5	Positive	negative	8	6	3	3	5	20	2	0.375	1	0	0	0	1
no	1831	Female	48.9836	45.3452		2020-01-05		149.27	45.7817		no	44.2667	85	20.4	Positive	negative	6	4	6	3	5	19	2	0.5	1	0	0	0	0
no	1832	Female	48.874	47.3205		2022-02-05		148.145	34.1449		no	18.9	28.9034	9.76129	Positive	negative	10	6	3	3	3	22	3	0.25	1	0	0	0	0
no	1833	Female	48.9808	47.4877		2022-03-01		175.892	55.1926		no	18.1667	32	3.64	Positive	negative	0	0	0	0	0	0	0	0	0	0	0	0	0
no	1834	Female	39.6	38.737		2022-10-17		173.386	61.7875		yes	10.5	10	3.64	Positive	Positive	0	0	0	0	0	0	0	0	0	1	0	0	1
no	1835	male	55.2164	52.6082		2021-01-19		160.548	56.5627		yes	31.7333	61.4267	41.2028	Positive	Positive	20	17	8	8	6	53	3	2	1	1	0	0	0
yes	1836	male	72.2	56.1123	71.0384	2007-08-01	2022-07-01	144.18	62.6986		no	195.733	63.3744	59.3653	Positive	Positive	0	0	1	1	0	2	0	0.125	1	0	0	1	1
no	1837	Female	37.1836	35.3178		2021-10-19		159.189	54.7918		no	22.7	22	3.64	Positive	Positive	8	6	2	2	2	18	2	0.375	1	0	0	0	0
no	1838	male	73.8	72.3671		2022-03-30		154.148	51.9429		no	17.4333	42.8091	15.1331	Positive	Positive	10	0	0	0	1	10	2	0	0	0	0	0	0
no	1839	Female	52.3562	47.3425		2018-08-31		160.014	60.4219		no	61	27	3.64	Positive	negative	1	0	0	0	1	1	0	0.125	1	0	0	0	0
no	1840	Female	55.9315	35.9562		2003-09-18		162.339	65.9206		no	243.033	42	3.64	Positive	Positive	28	0	5	5	5	38	3	2.125	1	0	0	0	0
no	1841	Female	56.5288	35.8822		2003-01-18		154.67	65.0461		yes	251.2	22	4.98	Positive	Positive	2	2	0	0	1	4	1	0	0	0	0	0	0
no	1842	Female	60.9534	56.3101				160.419	48.9045		no	0	16	3.19	Positive	negative	0.334296	5.75626	3.84733	3.28132	4.24266	13.2192	2	0.5	1	0	0	0	0
no	1843	Female	70.9616	62.5646				153.929	47.3109		no	0	40	1.63	Positive	Positive	8.74107	1.78893	2.62072	2.01239	0.942118	15.1631	2	0.675	1	1	0	0	1
no	1844	Female	30.1041	30.1041				162.213	54.1127		no	0	30	0.167	Positive	negative	3.04418	6.51447	5.2547	4.772	1.91662	19.5853	2	0.5	1	0	0	0	0
no	1845	Female	29.8164	29.8164				163.744	57.4277		no	0	26	0.167	negative	negative	1.29385	2.9501	3.95142	3.32131	3.43557	11.5167	2	0.15	1	1	0	0	1
no	1846	Female	42.337	42.337				175.795	44.5066		yes	0	84	10.8	negative	Positive	19.4367	10.1549	1.57264	2.61543	0.0403487	33.7796	3	0.675	1	1	0	0	0
no	1847	Female	57.9315	56.0211				147.482	34.3532		no	0	98	46.2	Positive	Positive	4.1483	4.77359	3.73963	3.72973	4.76897	16.3912	2	0.75	1	0	0	0	0
no	1848	male	49.9041	49.9041				164.558	64.4625		no	0	60	11.9	negative	Positive	16.5742	12.2363	3.37182	4.68343	5.55311	36.8657	3	0.62	1	0	0	1	0
no	1849	Female	63.6603	32.079				158.762	41.3007		no	0	66	43.9	Positive	Positive	8.13262	7.57256	3.33864	3.58915	2.82597	22.633	3	0.3	1	0	0	0	1
no	1850	Female	69.3616	54.9401				155.857	48.3808		no	0	30	3.06	Positive	negative	3.1344	3.16227	1.4918	2.19608	1.99634	9.98454	1	0.38	1	0	0	1	0
no	1851	Female	69.3205	50.6545				146.336	30.0348		no	0	86.2108	79	Positive	Positive	15.844	10.9991	4.04878	3.58369	4.35655	34.4756	3	1	1	1	1	0	0
no	1852	Female	76.3616	54.0416				151.014	59.1506		no	0	86	7.94	Positive	negative	6.73857	6.84181	7.32268	6.71263	5.88476	27.6157	3	0.12	1	1	0	0	0
no	1853	Female	58.3781	58.3781				157.74	56.9572		yes	0	24	3.19	negative	Positive	13.2264	7.73601	3.94834	3.3042	3.49975	28.2149	3	0.675	1	0	1	1	1
no	1854	Female	60.0301	60.0301				155.236	42.9521		no	0	60	7.05	Positive	Positive	10.2545	4.17258	1.64412	1.79267	1.75215	17.8639	2	1.625	1	0	0	0	1
no	1855	Female	58.8849	57.3481				155.042	40.8565		yes	0	55	24.26	Positive	Positive	8.70117	6.98601	4.10043	3.70957	3.3897	23.4972	3	1.62	1	1	0	1	1
no	1856	Female	65.7397	35.3099				138.869	36.802		no	0	20	2.33	Positive	Positive	14.2337	4.70463	9.07123	7.86455	5.59826	35.8741	3	0.25	1	0	0	0	0
no	1857	Female	75.2438	67.9989				168.552	70.1976		no	0	80	22.48	Positive	Positive	3.14111	6.61901	4.08754	2.60704	1.899	16.4547	2	1.625	1	1	0	0	0
no	1858	Female	64.6932	38.7965				153.179	46.4159		no	0	50	4.43	Positive	Positive	11.1316	6.72247	3.78241	4.32095	4.09372	25.9574	3	1.375	1	0	0	0	0
no	1859	Female	74.611	56.2079				144.927	55.8295		yes	0	62	18.2	Positive	Positive	11.6672	8.61555	4.44768	4.00107	2.86719	28.7315	3	1.625	1	0	0	0	0
no	1860	male	58.0767	37.9825				149.222	64.5577		no	0	37	0.721	Positive	Positive	9.13467	8.37101	5.13471	4.97575	4.25392	27.6161	3	0.8	1	1	0	0	0
no	1861	Female	56.6301	37.6243				158.12	49.6309		no	0	23	10.9	Positive	Positive	9.64105	6.85629	4.38441	3.70074	2.23445	24.5825	3	0.38	1	0	1	0	0
no	1862	Female	54.5589	54.5589				157.999	53.766		yes	0	53	17.6	Positive	Positive	2.68595	1.716	0.733981	0.0647881	0.171467	5.20072	1	0.15	1	0	0	0	0
no	1863	Female	59.1151	59.1151				157.777	53.8399		no	0	24	1.98	Positive	negative	1.71258	1.8594	0.41343	0.626648	1.78181	4.61206	1	0.5	1	0	0	0	1
no	1864	male	49.7863	49.7863				171.087	63.2593		no	0	58	24.44	Positive	Positive	4.2314	3.49713	2.15721	2.2523	2.59404	12.138	2	1.2	1	1	0	0	1
no	1865	Female	63.3397	33.1102				146.981	40.1991		no	0	36	1	negative	negative	1.44915	3.59213	1.94415	2.16153	0.866296	9.14695	1	0.3	1	1	1	1	1
no	1866	male	52.8904	52.0249				158.361	63.0689		no	0	25	2.19	Positive	Positive	1.09439	1.01433	2.15509	1.28369	2.50216	5.54749	1	0.3	1	0	0	0	0
no	1867	Female	53.5836	15.3164				170.555	51.1436		no	0	25	2.19	Positive	Positive	0.155059	1.29633	5.76926	4.94707	4.76346	12.1677	2	0.5	1	0	0	0	1
no	1868	Female	55.7781	55.7781				154.581	50.9732		no	0	12.7842	1.27	Positive	Positive	3.53861	0.972729	1.62425	2.70575	1.33524	8.84134	1	0	0	0	0	0	0
no	1869	Female	24.6164	24.6164				161.601	51.4671		no	0	26	12.4	Positive	negative	2.29492	0.286709	0.667822	0.108066	1.53943	3.35752	1	0	0	1	0	0	0
no	1870	Female	66.1425	40.9689				162.81	59.952		no	0	35	10.9	Positive	Positive	10.9852	1.97651	4.1477	4.06697	1.93007	21.1763	2	0.38	1	0	0	0	0
no	1871	Female	53.4027	40.9636				154.751	59.376		no	0	30	3.67	Positive	Positive	4.38781	1.04594	0.727806	0.546893	1.29764	6.70846	1	0.3	1	0	1	0	0
no	1872	male	61.6055	38.4842				158.768	55.1317		no	0	35	5.33	Positive	Positive	6.20991	8.37424	1.47126	2.47539	5.70194	18.5308	2	0.875	1	0	1	0	1
no	1873	Female	61.0767	40.7112				150.537	62.9149		yes	0	48	6.5	Positive	Positive	15.8006	8.66017	8.13772	7.2762	7.05049	39.8747	3	0.5	1	0	0	0	1
no	1874	Female	67.9014	30.9367				167.734	48.3519		no	0	51.3266	0.457	Positive	Positive	1.85742	2.22235	1.48759	0.258026	2.09367	5.82538	1	0.3	1	0	0	0	1
no	1875	Female	30.663	30.663				150.937	46.9523		no	0	18	0.845	Positive	Positive	2.57243	4.72731	1.57677	0.00399236	0.027422	8.88051	1	0.38	1	1	0	0	1
no	1876	Female	48.3041	48.3041				159.361	45.2544		yes	0	48	12.8	negative	Positive	2.17855	2.04039	3.01026	2.5712	2.73164	9.80039	1	0.12	1	0	0	0	0
no	1877	Female	64.1918	49.038				165.376	65.8522		no	0	10	0.322	Positive	negative	6.98319	8.00616	1.63961	2.38733	4.64786	19.0163	2	0.38	1	0	0	0	1
no	1878	Female	44.0301	44.0301				173.671	74.8789		no	0	21	4.38	negative	Positive	6.77522	7.94523	5.51686	5.94757	6.54764	26.1849	3	0	0	0	0	0	0
no	1879	Female	59.874	59.874				162.09	60.7322		yes	0	9	3.19	Positive	Positive	1.00379	4.17739	3.10769	3.71067	2.95123	11.9995	2	0.62	1	1	0	0	1
no	1880	male	36.7315	36.7315				159.898	71.211		no	0	169	140.98	Positive	Positive	19.3203	13.4029	8.49324	8.3806	5.81627	49.5971	3	1.2	1	0	0	0	1
no	1881	Female	56.6466	35.7282				162.135	63.2609		no	0	44	2.36	Positive	Positive	2.33012	3.28839	5.83457	4.82873	1.89414	16.2818	2	0.3	1	0	0	0	0
no	1882	Female	55.0932	49.9256				155.731	54.8437		yes	0	13	0.32	negative	Positive	2.07213	2.52545	5.48629	5.14039	5.55718	15.2243	2	0.15	1	1	0	0	1
no	1883	Female	54.8247	26.8002				155.7	59.5663		no	0	46	1.69	negative	Positive	4.7163	2.20701	2.34297	2.74721	2.34561	12.0135	2	0.3	1	1	0	0	0
no	1884	Female	59.2356	59.2356				168.652	47.0341		no	0	46.865	38.1319	Positive	Positive	0.0172934	0.905113	3.89157	3.35769	3.4059	8.17166	1	0.3	1	0	0	0	0
no	1885	male	34.4466	34.4466				170.51	69.7717		no	0	30	0.282	Positive	negative	0.631158	4.21285	3.02606	3.00813	3.0048	10.8782	2	0.25	1	0	0	0	1
no	1886	Female	34.337	34.337				153.309	45.829		no	0	28	0.527	Positive	negative	6.10646	5.97313	5.40397	4.57152	2.96451	22.0551	3	1	1	1	0	0	1
no	1887	Female	48.3726	29.8488				151.608	56.8704		no	0	18	8.92	negative	negative	11.8021	6.49888	4.48943	5.09163	4.60659	27.882	3	0.62	1	0	0	0	0
no	1888	Female	51.7589	47.5675				154.822	53.632		no	0	40	2.36	negative	Positive	9.65289	5.76008	2.21986	1.51066	1.78347	19.1435	2	1.375	1	0	0	0	0
no	1889	Female	42.0438	42.0438				156.987	57.2287		no	0	11	7.03894	Positive	Positive	5.54518	4.25018	4.69034	2.82551	1.93406	17.3112	2	0.3	1	0	0	0	0
no	1890	Female	71.9562	53.0112				161.313	49.4644		no	0	16	3.34	Positive	Positive	8.88435	10.4761	5.52491	4.47115	1.86123	29.3565	3	0.875	1	0	0	0	0
no	1891	Female	64.5096	29.8119				162.639	60.9315		no	0	59	4.48	Positive	negative	10.432	6.4029	4.39132	3.17198	5.03684	24.3982	3	0.15	1	0	0	0	0
no	1892	Female	28.3699	28.3699				155.02	46.3598		no	0	51	18.2	Positive	Positive	10.6293	5.16427	7.8253	7.39376	4.62379	31.0126	3	0.3	1	0	0	0	0
no	1893	Female	65.0247	65.0247				151.66	54.3693		yes	0	40	0.309	Positive	Positive	10.4358	1.74697	2.22571	1.42842	2.08671	15.8369	2	0.15	1	0	0	0	1
no	1894	Female	51.8767	51.8767				155.514	47.8409		no	0	51	4.8	Positive	Positive	6.49394	3.78444	5.55771	5.01761	2.3603	20.8537	2	0	0	0	0	0	0
no	1895	Female	51.6521	51.8468				164.679	59.6286		no	0	60	2.91	Positive	Positive	3.32001	1.64997	4.90672	4.07394	3.34361	13.9506	2	0.5	1	0	0	0	1
no	1896	Female	48.526	28.0105				169.243	66.2642		no	0	23	0.187	Positive	negative	7.31723	1.81006	3.62881	3.29721	3.37102	16.0533	2	0.375	1	0	0	0	1
no	1897	Female	58.2795	49.0691				163.786	62.3901		no	0	140	109.95	Positive	Positive	3.38569	9.79613	6.4114	5.53984	6.30693	25.1331	3	1.75	1	1	0	0	0
no	1898	Female	60.0082	60.0082				174.618	78.5178		yes	0	66	16.49	Positive	Positive	4.09201	2.78206	3.20968	2.64664	4.31087	12.7304	2	0.875	1	0	0	0	1
no	1899	male	76.0384	42.0516				143.324	58.6996		no	0	16	2.54	Positive	Positive	14.1319	6.7408	3.83522	4.40851	2.54857	29.1165	3	0.62	1	1	0	1	0
no	1900	Female	75.6712	42.2135				161.931	60.6579		no	0	13	2.1	Positive	Positive	10.242	6.9256	0.513058	0.098073	0.179604	17.7787	2	1.125	1	1	0	0	0
no	1901	male	58.1699	49.131				170.516	66.2364		no	0	19	3.1	Positive	negative	10.9822	7.27834	3.18313	3.10184	4.74339	24.5455	3	0.5	1	0	0	0	0
no	1902	Female	67.5562	29.3178				154.095	43.8982		no	0	19	1.12	negative	negative	5.3601	1.46879	3.74267	1.12907	3.64154	11.7006	2	0.5	1	0	0	0	0
no	1903	male	68.6493	58.5066				157.53	50.1221		no	0	53	25.3	Positive	Positive	6.59737	3.1711	4.22235	3.66456	2.64072	17.6554	2	0.5	1	0	0	0	0
no	1904	male	47.074	47.074				155.144	53.4654		no	0	20	5.53	Positive	Positive	8.80317	0.205658	6.05994	5.55039	4.57123	20.6192	2	0.3	1	0	0	0	0
no	1905	Female	54.1973	41.318				179.249	73.4607		yes	0	8	3.4	Positive	negative	6.60699	3.04745	5.13595	4.04181	3.63162	18.8322	2	1	1	0	0	1	1
no	1906	Female	54.4521	54.4521				166.989	68.7746		no	0	16	19.8	Positive	negative	12.562	6.25873	3.52955	2.2647	1.35283	24.615	3	0.75	1	1	0	0	1
no	1907	male	64.5836	35.7581				172.137	58.7756		no	0	37.687	17.1	Positive	Positive	1.1223	2.74089	2.21351	1.28969	1.54401	7.36639	1	0.875	1	0	0	0	0
no	1908	Female	63.7945	63.7945				163.443	66.162		yes	0	96	30.9	Positive	negative	4.11193	3.21926	5.77297	5.7389	4.98733	18.8431	2	0.38	1	0	0	0	1
no	1909	Female	66.263	55.1203				155.823	63.7378		no	0	41	1.18	Positive	negative	1.02085	0.892735	4.9008	3.91744	4.36092	10.7318	2	0.75	1	1	0	0	1
no	1910	Female	59.0849	40.0223				154.219	47.619		yes	0	18	9.13	Positive	Positive	13.8249	3.76001	4.88051	4.53185	3.78454	26.9972	3	0.875	1	0	0	0	0
no	1911	Female	60.9616	23.8279				154.635	52.916		no	0	140	38.2	Positive	Positive	8.41219	12.8482	7.23289	6.3435	5.64055	34.8368	3	0.38	1	0	0	0	0
no	1912	Female	61.6301	42.6861				154.811	53.9668		yes	0	95	51.7	Positive	Positive	9.01056	3.39342	2.22247	2.61649	4.71089	17.2429	2	1.125	1	1	0	0	1
no	1913	male	42.9479	42.9479				171.291	61.3968		no	0	24	3.19	Positive	Positive	3.0428	2.48228	0.929898	1.10685	3.57811	7.56182	1	0.12	1	0	0	0	0
no	1914	Female	67.2575	47.8236				146.439	44.0189		no	0	122	8.19	Positive	Positive	4.55562	0.14693	5.45396	3.874	4.24652	14.0305	2	0.8	1	0	0	0	0
no	1915	Female	66.7699	38.4621				174.573	68.7376		yes	0	38	51	negative	negative	6.7977	1.18051	0.606036	1.00455	0.189458	9.58879	1	0.3	1	0	1	0	0
no	1916	male	69.611	29.5404				157.725	53.4975		no	0	45	42.13	Positive	negative	0.282372	1.64595	6.76805	5.07865	3.49178	13.775	2	2	1	0	0	0	0
no	1917	Female	53.4685	29.4586				171.107	82.2499		no	0	58	11	Positive	Positive	6.18511	5.98084	1.85038	2.45209	2.27919	16.4684	2	1.375	1	0	0	0	0
no	1918	Female	53.3288	43.4394				160.556	51.9829		no	0	113	22.8	Positive	Positive	2.96348	4.9283	3.84092	2.80088	4.23664	14.5336	2	1	1	0	0	0	0
no	1919	Female	63.0493	36.7628				169.617	64.6091		no	0	37	3.19	Positive	Positive	2.83143	1.29427	7.97979	8.18189	7.05724	20.2874	2	1.125	1	1	1	1	1
no	1920	Female	52.2877	52.2877				166.227	66.8903		no	0	70	1.43	Positive	Positive	8.88581	8.54019	2.1438	1.84019	2.19815	21.41	2	1.375	1	1	0	1	1
no	1921	Female	62.5315	41.4507				153.802	41.6773		no	0	67	2.1	Positive	Positive	3.13177	3.04291	1.54473	0.343037	0.391288	8.06245	1	0	0	0	0	0	0
no	1922	Female	65.6877	37.5349				148.171	62.385		no	0	31	0.996	Positive	Positive	13.5059	7.99738	6.76199	5.8877	5.38602	34.153	3	0	0	1	0	1	0
no	1923	male	56.3041	53.7021				170.822	44.6891		no	0	45	0.836	Positive	negative	3.97077	4.09045	6.90072	6.48691	6.00845	21.4488	2	0	0	0	0	0	0
no	1924	Female	66.9918	33.0439				163.983	66.048		no	0	73	12.2	negative	negative	7.03674	1.51676	5.55925	4.48428	2.99874	18.597	2	0.25	1	0	0	0	1
no	1925	Female	60.7753	61.239				178.122	69.3179		no	0	27	2.02	Positive	Positive	5.55777	9.50808	4.11923	4.42037	4.20268	23.6054	3	1.2	1	0	0	0	1
no	1926	Female	56.6137	56.9901				143.844	46.9782		no	0	2	0.363	Positive	Positive	0.261669	0.071176	1.85947	1.00741	0.741935	3.19973	1	0.3	1	1	0	0	0
no	1927	Female	40.6055	32.5691				151.141	43.583		no	0	105	69.9	Positive	negative	3.3681	0.785031	3.2881	1.83165	2.10988	9.27289	1	0.875	1	1	0	0	1
no	1928	Female	67.9315	48.2545				158.644	56.8229		no	0	16	1.51	Positive	Positive	1.94789	0.829216	6.19474	6.36139	5.10105	15.3332	2	0.3	1	0	0	0	1
no	1929	Female	50.6658	30.7008				149.003	53.2561		no	0	11	0.79	Positive	Positive	16.14	11.4895	4.21247	4.38321	5.69693	36.2252	3	0.5	1	1	0	1	1
no	1930	Female	64.5068	60.3986				167.315	63.7636		no	0	24	0.982	negative	Positive	4.26365	0.109869	3.42867	3.17508	2.10293	10.9773	2	1	1	0	0	0	1
no	1931	Female	42.1096	42.1096				166.736	59.1695		no	0	49.6984	10.9	negative	negative	0.456675	1.283	7.6537	5.94996	8.6899	15.3433	2	1	1	1	1	0	0
no	1932	Female	78.4767	42.3087				157.79	43.3366		no	0	35	3.19	Positive	Positive	0.8966	1.77308	3.82972	2.9793	1.52191	9.47871	1	0.38	1	1	0	1	0
no	1933	Female	64.4	56.1608				151.585	42.0317		no	0	0.370617	0.901	Positive	Positive	3.24952	6.00325	6.32017	5.66714	4.99398	21.2401	2	0	0	0	0	0	0
no	1934	Female	39.5616	39.5616				166.106	60.2164		no	0	61	0.325	Positive	Positive	6.33764	6.33706	4.75953	4.288	3.24165	21.7222	2	0.15	1	0	0	0	0
no	1935	male	28.2301	28.2301				166.742	50.2999		no	0	66.7722	72	negative	negative	8.92662	9.85457	5.77069	4.47251	3.57394	29.0244	3	1.2	1	0	0	0	0
no	1936	male	66.2822	40.4676				165.203	49.1147		no	0	28	0.321	Positive	Positive	0.0931677	0.867561	2.16626	1.56532	2.08219	4.69231	1	0	0	0	0	0	0
no	1937	Female	43.7781	22.192				154.731	43.0745		no	0	6	0.616	negative	negative	11.5426	4.89506	5.60645	5.91566	6.13588	27.9598	3	0.8	1	1	0	0	0
no	1938	Female	55.0959	55.0959				157.426	62.4398		no	0	69	28.14	Positive	Positive	13.2763	11.9832	2.93123	2.6972	2.18603	30.8879	3	0.675	1	1	0	0	0
no	1939	Female	60.1205	60.1205				152.823	60.7422		no	0	30	2.51	Positive	Positive	1.1565	3.86902	5.87318	4.74425	6.52289	15.643	2	0.38	1	1	0	1	1
no	1940	Female	82.5014	50.4156				151.434	54.7462		no	0	46	9.46	Positive	negative	2.71155	0.532994	6.50531	6.05478	7.11548	15.8046	2	0.675	1	0	0	0	0
no	1941	Female	33.1836	33.1836				154.627	66.186		yes	0	15	4.39	negative	negative	6.84885	2.86699	0.87513	1.15771	0.352812	11.7487	2	2	1	1	1	0	0
no	1942	Female	48.8438	8.29203				162.372	59.1846		no	0	25	1.38	Positive	negative	2.46202	2.50811	6.81394	4.78964	2.57354	16.5737	2	0.5	1	0	0	0	0
no	1943	Female	53.0986	53.0986				165.982	69.0136		no	0	6	0.24	Positive	Positive	4.43105	6.91412	2.17473	1.38074	3.50977	14.9006	2	0.3	1	0	0	0	0
no	1944	Female	48.5123	48.5123				163.16	64.7006		no	0	60	4.93	Positive	Positive	2.32286	3.59693	2.69216	1.91558	4.34677	10.5275	2	0.5	1	0	0	0	0
no	1945	male	60.326	45.7812				152.704	49.2038		no	0	82	8.38	Positive	Positive	3.15156	5.0295	2.68302	2.20356	2.80606	13.0676	2	0.62	1	0	1	0	0
no	1946	Female	52.9726	43.378				162.918	62.3548		no	0	16	0.766	negative	negative	5.3553	3.35205	7.64737	6.17088	6.84445	22.5256	3	0.3	1	0	0	0	1
no	1947	Female	52.8301	28.3783				159.901	66.5965		no	0	14	0.276	negative	Positive	10.7124	11.1528	3.34037	3.02589	1.82752	28.2315	3	0.62	1	1	0	0	0
no	1948	Female	49.7644	39.332				164.148	50.6969		no	0	48	1.44	Positive	Positive	5.32638	3.38447	3.67877	2.55291	1.91013	14.9425	2	0.38	1	0	0	0	0
no	1949	Female	54.2301	31.1479				153.95	54.8624		no	0	65	9.57	Positive	Positive	9.51282	5.93935	9.23093	9.69272	6.3541	34.3758	3	0.25	1	0	0	0	0
no	1950	Female	53.4137	51.7697				152.113	54.2551		no	0	62	2.67	Positive	Positive	4.40902	4.46613	1.3501	1.34882	0.950591	11.5741	2	0	0	0	0	0	1
no	1951	Female	70.3534	47.5629				143.662	52.3911		no	0	94	25.1	negative	Positive	3.93978	0.371335	3.78051	2.95148	2.81742	11.0431	2	2.375	1	0	0	0	0
no	1952	Female	53.4192	33.4953				148.985	34.2809		no	0	50	10.2	negative	Positive	3.85199	5.09188	4.44163	3.50676	2.75923	16.8923	2	0	0	0	0	0	1
no	1953	male	60.6795	33.3944				167.065	44.744		no	0	12	0.442	Positive	Positive	9.46527	0.191854	2.60059	1.03449	1.05522	13.2922	2	1.2	1	0	0	0	0
no	1954	Female	22.2274	22.2274				160.307	57.8101		no	0	116	30.7	Positive	Positive	11.1987	5.01362	2.43083	2.14171	4.82866	20.7849	2	0.5	1	1	0	0	0
no	1955	Female	22.2219	22.2219				170.509	55.6764		no	0	118	16	Positive	Positive	10.6423	10.3246	7.7184	8.04598	6.164	36.7313	3	1.125	1	0	0	0	0
no	1956	Female	52.4822	20.803				145.733	43.2086		no	0	22	0.931	Positive	negative	5.17081	5.29059	3.91224	3.45947	2.01574	17.8331	2	0	0	0	0	0	0
no	1957	male	42.011	42.011				144.872	47.9935		no	0	2.38919	3.87	negative	negative	14.6388	8.1041	5.65622	5.25962	5.67051	33.6588	3	1.2	1	0	0	0	0
no	1958	Female	68.9726	42.756				158.715	62.5848		no	0	16	2.23	Positive	Positive	9.03249	7.10906	5.07958	5.09297	5.75854	26.3141	3	0.62	1	0	1	0	1
no	1959	Female	71.2685	65.6013				156.783	50.13		yes	0	104	68.6	Positive	Positive	5.79599	7.56257	3.47936	2.28651	3.47496	19.1244	2	1.2	1	1	0	0	0
no	1960	Female	52.674	32.0994				155.257	67.887		no	0	58.7229	0.847	negative	negative	1.29652	2.2633	3.8326	4.96819	1.866	12.3606	2	0.5	1	0	0	0	0
no	1961	Female	60.8247	42.4936				152.9	43.7407		no	0	38	0.93	Positive	Positive	9.2453	0.60175	4.05832	3.32718	4.48609	17.2326	2	1.125	1	0	0	0	0
no	1962	Female	41.4548	41.4548				156.933	57.2907		no	0	9	3.65	negative	Positive	1.08554	0.710451	1.58328	1.41809	2.40376	4.79736	1	0.875	1	0	0	0	1
no	1963	male	68.0493	51.1425				163.212	62.6693		no	0	30	13	Positive	Positive	3.50258	3.5688	1.58756	1.30878	2.75774	9.96774	1	1	1	0	0	0	0
no	1964	Female	59.7123	33.9566				159.467	70.4021		no	0	30	4.66	negative	negative	8.34968	5.41962	0.260655	0.851657	0.792033	14.8816	2	0.3	1	0	0	0	0
no	1965	Female	62.3808	40.1942				158.375	47.9961		no	0	6	1.12	Positive	Positive	6.23097	5.16111	4.29855	4.41928	6.31271	20.1099	2	0.5	1	1	0	0	1
no	1966	Female	40.6247	38.2869				153.5	48.4365		no	0	24	0.984	Positive	negative	13.5899	4.07352	2.61894	3.08658	0.910963	23.369	3	0.5	1	0	0	0	0
no	1967	Female	56.6822	33.6095				165.218	63.7703		no	0	52	22.6	Positive	Positive	2.37227	0.816888	2.83147	2.11719	1.16729	8.13782	1	1.2	1	0	0	0	0
no	1968	Female	74.0603	55.204				162.559	58.921		no	0	78	12.3	Positive	Positive	13.3746	8.81553	6.8015	6.0154	5.4653	35.007	3	0.25	1	0	0	0	0
no	1969	male	55.5616	54.235				167.651	64.3147		no	0	153.915	87.6	Positive	Positive	9.02746	5.5605	2.83111	3.12371	1.83104	20.5428	2	1.845	1	0	0	0	0
no	1970	Female	65.674	56.2174				166.075	65.9833		no	0	26	1.01	Positive	Positive	2.19747	6.4978	2.46153	2.60161	2.04097	13.7584	2	0.5	1	0	0	0	0
no	1971	Female	54.8685	54.8844				165.662	47.2433		no	0	18	0.965	Positive	Positive	10.3383	3.58789	4.4441	5.40656	6.20329	23.7769	3	0	0	0	0	0	0
no	1972	Female	86.5712	46.3367				161.019	58.6718		no	0	153	127	negative	negative	23.9923	14.599	3.99797	4.99902	3.68733	47.5884	3	1	1	1	0	1	1
no	1973	Female	65.4932	65.4932				176.129	63.2585		no	0	145	97	negative	negative	7.05596	10.5557	7.27944	6.60367	4.26371	31.4947	3	1	1	1	0	1	0
no	1974	male	83.6986	36.9572				154.338	48.9871		yes	0	37	10.5	negative	negative	1.59049	2.56496	5.2869	3.60434	3.64037	13.0467	2	0.3	1	1	0	0	1
no	1975	Female	27.6082	27.6082				156.865	45.3939		no	0	21	1.3	negative	negative	9.9397	1.30636	1.51885	0.820449	2.46545	13.5854	2	0.675	1	0	0	0	0
no	1976	Female	27.9131	27.9131				158.722	48.2369		no	0	38	15	negative	negative	4.19056	2.13296	3.935	2.8769	4.67605	13.1354	2	0.675	1	0	0	0	0
no	1977	male	81.4137	44.4394				148.654	49.3182		yes	0	95	84.2	negative	negative	10.0346	7.64794	2.33285	1.80451	2.54513	21.8199	2	2	1	0	0	0	0
no	1978	Female	82.5014	59.9338				157.89	59.673		no	0	28	3.4	negative	negative	17.899	12.3241	7.55307	7.51003	5.82975	45.2862	3	0.8	1	0	0	0	1
no	1979	Female	55.4247	55.4247				166.982	58.2073		no	0	31	3.3	negative	negative	5.40629	4.34927	0.765501	0.00745101	0.124405	10.5285	2	1	1	0	0	0	0
no	1980	male	54.3781	51.7659				169.166	55.4581		yes	0	82	91	negative	negative	12.8411	10.8113	2.95441	4.35984	3.54279	30.9666	3	0.5	1	0	0	0	0
no	1981	Female	66.3726	40.5967				170.058	59.4956		no	0	124	72.6	negative	negative	10.9373	0.664952	6.49351	6.18414	5.9837	24.2799	3	1.375	1	1	0	0	0
no	1982	Female	73.6712	40.3115				156.829	48.6613		no	0	34	0.8	negative	negative	7.29577	5.03273	2.69068	1.51164	1.55772	16.5308	2	0.5	1	0	0	0	0
no	1983	Female	65.1123	60.4153				160.53	54.2539		no	0	20	7.5	negative	negative	12.1978	9.77451	3.32091	4.13413	3.65916	29.4274	3	1	1	0	0	0	0
no	1984	Female	77.7644	36.9054				155.175	48.3162		yes	0	14	3	negative	negative	2.69314	6.69178	1.6051	1.45552	0.000832725	12.4455	2	0.62	1	0	0	0	0
no	1985	Female	79.1342	40.9162				147.415	56.4099		no	0	55	6.46	negative	negative	0.745565	0.248715	0.00231355	0.150966	0.702304	1.14756	0	1	1	0	0	0	0
no	1986	Female	75.3151	46.3923				155.742	61.981		no	0	21	3.4	negative	negative	2.14571	4.21567	8.37487	8.38211	5.7953	23.1184	3	0.15	1	0	0	0	0
no	1987	Female	60.8932	27.9871				157.067	59.1613		no	0	76	43	negative	negative	1.00567	1.34653	0.135541	1.24992	2.2651	3.73767	1	0.5	1	0	1	0	0
no	1988	Female	50.8192	24.4406				161.464	61.5055		no	0	9	3	negative	negative	4.44324	9.30468	1.66944	1.01724	0.744527	16.4346	2	0	0	0	1	0	0
no	1989	male	58.4521	58.4521				156.115	53.9984		no	0	35	12	negative	negative	8.3079	5.71624	0.402834	0.674631	0.924848	15.1016	2	0.12	1	0	0	0	1
no	1990	Female	59.4137	26.4599				165.923	67.059		no	0	45	4	negative	negative	8.35088	10.7355	2.75232	3.47235	2.55192	25.311	3	0	0	0	0	0	0
no	1991	male	69.337	51.2708				176.057	75.5281		yes	0	126	83	negative	negative	7.77037	0.736331	2.39697	2.24045	0.0674201	13.1441	2	0.38	1	1	1	1	0
no	1992	Female	71.0055	34.3948				150.148	41.2138		no	0	35	5.5	negative	negative	1.69219	5.97008	5.16604	5.04551	3.79443	17.8738	2	0.5	1	0	0	0	0
no	1993	male	63.0013	39.4646				156.381	42.4676		yes	0	45	25.5	negative	negative	9.70238	11.9397	6.03522	4.63086	7.51224	32.3082	3	1.2	1	1	0	0	0
no	1994	Female	31.3425	31.3425				174.005	50.7572		no	0	35	19.4	negative	negative	1.56767	2.6073	1.36479	1.81314	0.859394	7.3529	1	1.625	1	0	1	0	0
no	1995	Female	46.3634	46.0201				158.099	48.0915		no	0	75	31.2	negative	negative	5.87373	4.89346	1.70378	1.98389	1.69969	14.4549	2	1.875	1	0	0	0	0
no	1996	Female	58.2917	41.7661				160.457	56.4085		no	0	82	122	negative	negative	12.2	5.70503	5.45508	6.13158	4.67177	29.4917	3	1.5	1	1	0	0	1
no	1997	Female	33.84	33.84				162.67	53.5854		no	0	82	80	negative	negative	19.754	20.1298	7.53358	8.21088	7.65312	55.6282	3	0.75	1	0	1	0	0
no	1998	Female	79.0667	56.4796				154.076	66.1979		no	0	86	10	negative	negative	6.53129	3.70747	2.81469	3.26384	3.73363	16.3173	2	1.125	1	1	0	0	0
no	1999	Female	70.4411	51.6337				156.052	58.1765		no	0	83	45	negative	negative	10.9674	5.01853	6.39917	6.00926	4.89396	28.3944	3	0.875	1	0	0	0	0
[truncated: 74 more rows]
